# Supplementary material
Source: PubMed Central journal article supplement (PMC2750882)

## Catalytic Enantioselective Allylation of Dienals Through the Intermediacy of Unsaturated $\pi$ -Allyl Complexes

Ping Zhang and James P. Morcken\*

*Department of Chemistry, Merkert Chemistry Center, Boston College, Chestnut Hill, MA 02467*

### Supporting Information

#### Table of Contents

|                                                                                                                         |      |
|-------------------------------------------------------------------------------------------------------------------------|------|
| <b>GENERAL INFORMATION</b> .....                                                                                        | S-2  |
| <b>EXPERIMENTAL PROCEDURES</b> .....                                                                                    | S-3  |
| Preparation of Dienals .....                                                                                            | S-3  |
| Procedure for Non-Catalyzed Allylation ( <b>Scheme 1</b> ) .....                                                        | S-5  |
| Representative Procedure for Ni-Catalyzed Allylation at Ambient Temperature ( <b>Scheme 1 and Table 1</b> ) .....       | S-5  |
| Representative Procedure for Ni-Catalyzed Allylation at -35 °C ( <b>Table 2</b> ) .....                                 | S-6  |
| Characterization and Proof of Stereochemistry .....                                                                     | S-7  |
| Procedure for Functionalization of ( <i>S</i> ,5 <i>Z</i> ,7 <i>E</i> )-nona-1,5,7-trien-4-ol ( <b>Scheme 2</b> ) ..... | S-19 |
| <b>SPECTRAL DATA</b> .....                                                                                              | S-21 |

## General Information

$^1\text{H}$  NMR spectra were recorded on either a Varian Gemini-400 (400 MHz), or a Varian Inova-500 (500 MHz) spectrometer. Chemical shifts are reported in ppm with the solvent resonance as the internal standard ( $\text{CDCl}_3$ : 7.26 ppm). Data are reported as follows: chemical shift, integration, multiplicity (s = singlet, d = doublet, t = triplet, q = quartet, p = pentet, br = broad, m = multiplet), coupling constants (Hz), and assignment.  $^{13}\text{C}$  NMR spectra were recorded on either a Varian Gemini-400 (100 MHz), or a Varian Inova-500 (125 MHz) spectrometer with complete proton decoupling. Chemical shifts are reported in ppm with the solvent resonance as the internal standard ( $\text{CDCl}_3$ : 77.23 ppm). Infrared (IR) spectra were recorded on a Bruker alpha spectrophotometer,  $\nu_{\text{max}}$   $\text{cm}^{-1}$ . Bands are characterized as broad (br), strong (s), medium (m), and weak (w). High resolution mass spectrometry (ESI) was performed at the Mass Spectrometry Facility, Boston College.

Liquid Chromatography was performed using forced flow (flash chromatography) on silica gel ( $\text{SiO}_2$ , 230 $\times$ 450 Mesh) purchased from Silicycle. Thin Layer Chromatography was performed on 25  $\mu\text{m}$  silica gel plates purchased from Silicycle. Visualization was performed using ultraviolet light (254 nm), phosphomolybdic acid (PMA) in ethanol, or potassium permanganate ( $\text{KMnO}_4$ ) in water. Analytical chiral gas-liquid chromatography (GLC) was performed on a Hewlett-Packard 6890 Series chromatograph equipped with a split mode capillary injection system, a flame ionization detector, and a Supleco  $\beta$ -Dex 120 column with helium as the carrier gas. Analytical chiral supercritical fluid chromatography (SFC) was performed on a Berger Instruments Supercritical Chromatograph equipped with an Alcott auto sampler and a Knauer UV detector with methanol as the modifier. Analytical high performance liquid chromatography (HPLC) was performed on a Shimadzu chromatography equipped with two LC-10APvp pumps, SPD-10AVvp UV detector and SIL-10ADvp injector. Optical rotations were measured on a Rudolph Analytical Research Autopol IV Polarimeter.

All reactions were conducted in oven- or flame-dried glassware under an inert atmosphere of nitrogen or argon. Tetrahydrofuran (THF) and dichloromethane (DCM) were purified using a Pure Solv MD-4 solvent purification system from Innovative Technology Inc. Bis(1,5-cyclooctadiene)nickel(0) [ $\text{Ni}(\text{cod})_2$ ] and tricyclohexylphosphine ( $\text{PCy}_3$ ) were purchased from Strem Chemicals, Inc. Acetic acid and dimethyl malonate were distilled under reduced pressure. Hoveyda-Grubbs catalyst second generation (HG-II) refers to [1,3-Bis(2,4,6-trimethylphenyl)-2-imidazolidinylidene] dichloro(*o*-isopropoxyphenylmethylene)ruthenium.<sup>1</sup> All other reagents were purchased from either Fisher or Aldrich and used without further purification. (*R,R*)- $^t\text{BuTADDOLPPh}$  (**L1**)<sup>2</sup>, (*R,R*)-xylylTADDOLPPh (**L2**)<sup>1</sup>, (*R,R*)-TADDOLPPh (**L3**)<sup>1</sup>, (*R,R*)-

<sup>1</sup> Garber, S.B.; Kingsbury, J.S.; Gray, B.L.; Hoveyda, A.H. *J. Am. Chem. Soc.* **2000**, *122*, 8168.

<sup>2</sup> Sieber, J. D.; Morken, J. P. *J. Am. Chem. Soc.* **2008**, *130*, 4978.

TADDOLPN(C<sub>4</sub>H<sub>8</sub>) (**L4**)<sup>3</sup> and (*R,R*)-TADDOLPN(C<sub>4</sub>H<sub>8</sub>) (**L5**)<sup>2</sup> were prepared according to literature procedures.

## Experimental Procedures

### Preparation of Dienals

#### Representative Procedure for the Synthesis of Dienals

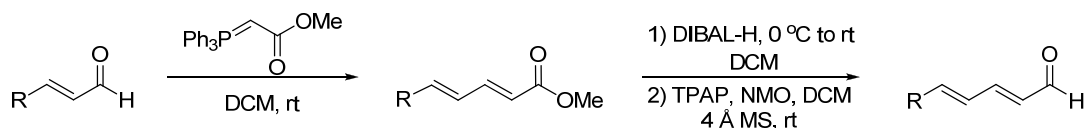

The following dienals were prepared from commercially available  $\alpha,\beta$ -unsaturated aldehydes: (*2E,4E*)-deca-2,4-dienal (Table 2, entries 3 and 4)<sup>4</sup> and (*2E,4E*)-phenylpenta-2,4-dienal (Table 2, entry 5)<sup>3</sup>. Spectral data are in accordance with the literature references.

(*2E,4E*)-5-cyclohexylpenta-2,4-dienal was prepared from (*E*)-3-cyclohexylacrylaldehyde (Table 2, entry 8), which was originally synthesized from cyclohexanecarboxaldehyde according to general procedure. Spectral data are in accordance with the literature reference.<sup>3</sup>

(*2E,4E*)-5-(furan-2-yl)penta-2,4-dienal (Table 2, entry 9) was prepared according to the literature procedure.<sup>5</sup> Spectral data are in accordance with the literature reference.

#### Preparation of (*2E,4E*)-6-(*tert*-butyldimethylsilyloxy)hexa-2,4-dienal

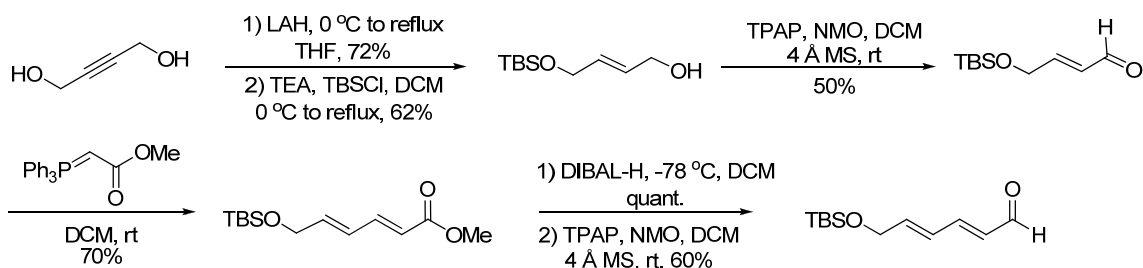

**(*2E,4E*)-6-(*tert*-butyldimethylsilyloxy)hexa-2,4-dienal (Table 2, entry 7).** A light yellow oil.  $R_f = 0.48$  (3:1 hexane:EtOAc); <sup>1</sup>H NMR (400 Hz,

<sup>3</sup> Burks, H. E.; Morken, J. P. *J. Am. Chem. Soc.* **2007**, *129*, 8766.

<sup>4</sup> Rein, T.; Kann, N.; Åkermark, B.; Helquist, P. *J. Org. Chem.* **1990**, *55*, 5312.

<sup>5</sup> Bellassoued, M.; Salemkour, M. *Tetrahedron.* **1996**, *52*, 4507.

CDCl<sub>3</sub>):  $\delta$  0.09 (6H, s, Si(CH<sub>3</sub>)<sub>2</sub>), 0.93 (9H, s, SiC(CH<sub>3</sub>)<sub>3</sub>), 4.34 (2H, dd,  $J = 4.2$  Hz, 1.8 Hz, SiOCH<sub>2</sub>CH=CH), 6.15 (1H, dd,  $J = 15.2$  Hz, 8.0 Hz, C(O)HCH=CH), 6.32 (1H, dt,  $J = 15.2$  Hz, 4.0 Hz, SiOCH<sub>2</sub>CH=CH), 6.56 (1H, ddt,  $J = 15.2$  Hz, 10.8 Hz, 2.0 Hz, SiOCH<sub>2</sub>CH=CH), 7.13 (1H, dd,  $J = 15.4$  Hz, 11.0 Hz, C(O)HCH=CH), 9.57 (1H, d,  $J = 8.4$  Hz, C(O)H); <sup>13</sup>C NMR (100 Hz, CDCl<sub>3</sub>):  $\delta$  193.9, 151.7, 144.4, 131.5, 127.0, 63.1, 26.1, 18.7, -5.05 ppm; IR (neat): 2954.7 (m), 2930.0 (m), 2886.1 (w), 2856.8 (w), 2728.7 (m), 1684.6 (s), 1645.7 (s), 1602.7 (w), 1643.4 (w), 1362.1 (w), 1264.2 (m), 1161.5 (m), 1131.98 (s) cm<sup>-1</sup>; HRMS (ESI+) for C<sub>12</sub>H<sub>23</sub>O<sub>2</sub>Si [M+H]: calculated 227.1467, found: 227.1475.

### Preparation of (2E,4E)-6-(benzyloxy)hexa-2,4-dienal

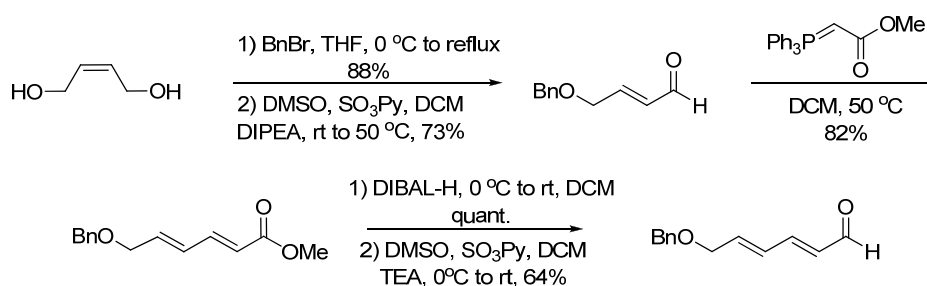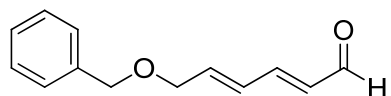

**(2E,4E)-6-(benzyloxy)hexa-2,4-dienal** (Table 2, entry 6). A yellow oil.  $R_f = 0.37$  (3:1 hexane:EtOAc); <sup>1</sup>H NMR (400 Hz, CDCl<sub>3</sub>):  $\delta$  4.18 (2H, d,  $J = 5.2$  Hz, OCH<sub>2</sub>CH=CH), 4.57 (2H, s, PhCH<sub>2</sub>O), 6.16 (1H, dd,  $J = 15.2$  Hz, 8.0 Hz, C(O)HCH=CH), 6.32 (1H, dt,  $J = 15.2$  Hz, 5.2 Hz, OCH<sub>2</sub>CH=CH), 6.58 (1H, ddm,  $J = 15.2$  Hz, 10.8 Hz, OCH<sub>2</sub>CH=CH), 7.13 (1H, dd,  $J = 15.4$  Hz, 11.0 Hz, C(O)HCH=CH), 7.31-7.36 (5H, m, Ph-H), 9.58 (1H, d,  $J = 8.0$  Hz, C(O)H); <sup>13</sup>C NMR (125 Hz, CDCl<sub>3</sub>):  $\delta$  194.0, 151.4, 141.2, 137.9, 132.0, 126.2, 128.7, 128.1, 128.0, 73.1, 69.7 ppm; IR (neat): 3030.9 (w), 2845.9 (br), 2735.3 (w), 1678.8 (s), 1643.4 (s), 1602.1(w), 1469.6 (w), 1453.3 (m), 1391.1 (w), 1360.4 (m), 1161.9 (m), 1101.9 (s) cm<sup>-1</sup>; HRMS (ESI+) for C<sub>13</sub>H<sub>15</sub>O<sub>2</sub> [M+H]: calculated 203.1072, found: 203.1082.

### Preparation of (2E,4E)-7-(tert-butyldimethylsilyloxy)hepta-2,4-dienal

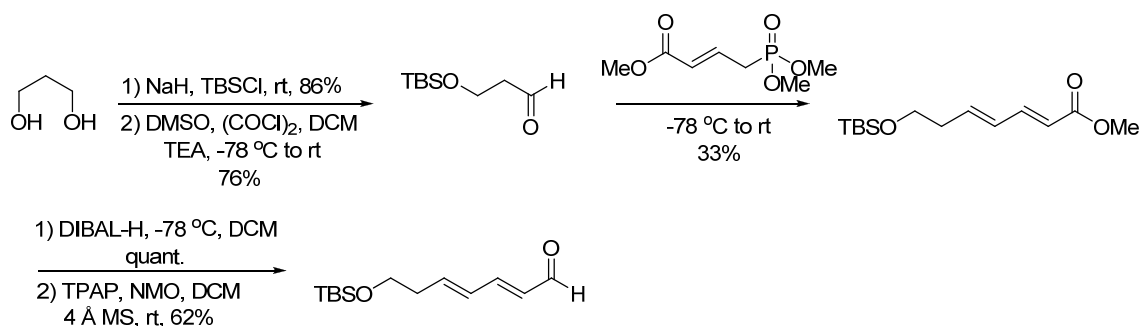

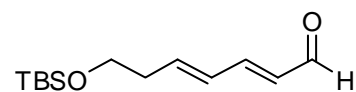
**(2E,4E)-7-(tert-butyldimethylsilyloxy)hepta-2,4-dienal (Table 2, entry 10).** A yellow oil.  $R_f = 0.65$  (3:1 hexane:EtOAc);  $^1\text{H NMR}$  (400 Hz,  $\text{CDCl}_3$ ):  $\delta$  0.05 (6H, s,  $\text{Si}(\text{CH}_3)_2$ ), 0.89 (9H, s,  $\text{SiC}(\text{CH}_3)_3$ ), 2.43 (2H, q,  $J = 6.4$  Hz,  $\text{CH}_2\text{CH}_2\text{CH}=\text{CH}$ ), 3.73 (2H, t,  $J = 6.4$  Hz,  $\text{CH}_2\text{CH}_2\text{CH}=\text{CH}$ ), 6.09 (1H, dd,  $J = 15.2$  Hz, 8.0 Hz,  $\text{C}(\text{O})\text{HCH}=\text{CH}$ ), 6.26-6.41 (2H, m,  $\text{CH}_2\text{CH}=\text{CH}$  and  $\text{CH}_2\text{CH}=\text{CH}$ ), 7.09 (1H, dd,  $J = 15.2$  Hz, 10.0 Hz,  $\text{C}(\text{O})\text{HCH}=\text{CH}$ ), 9.55 (1H, d,  $J = 7.6$  Hz,  $\text{C}(\text{O})\text{H}$ );  $^{13}\text{C NMR}$  (100 Hz,  $\text{CDCl}_3$ ):  $\delta$  194.0, 152.6, 143.7, 130.6, 130.4, 62.1, 36.9, 26.1, 18.6, -5.0 ppm; IR (neat): 2953.4 (m), 2928.7 (m), 2885.7 (w), 2856.8 (m), 2738.5 (w), 1685.1 (s), 1640.9 (s), 1600.3 (w), 1471.1 (w), 1289.1 (w), 1254.8 (m), 1098.7 (s), 936.7 (m)  $\text{cm}^{-1}$ ; HRMS (ESI+) for  $\text{C}_{13}\text{H}_{25}\text{O}_2\text{Si}$  [ $\text{M}+\text{H}$ ]: calculated 241.1624, found: 241.1633.

### Procedure for Non-Catalyzed Allylation (Scheme 1)

An oven-dried 2-dram vial equipped with a magnetic stir-bar was charged with 33.7 mg (0.351 mmol) of sorbic aldehyde in a dry-box under an argon atmosphere, followed by 0.70 mL of THF and 70.7 mg (0.421 mmol) of allylboronic acid pinacol ester, sequentially. The vial was capped, taped with electrical tape, removed from the dry-box, and allowed to stir at ambient temperature for 15 hours. After this time period, deionized water was added and the mixture was allowed to stir for another 10 minutes. The aqueous layer was washed with  $\text{CH}_2\text{Cl}_2$  ( $\times 3$ ), and the combined organic layers were dried with  $\text{Na}_2\text{SO}_4$  and concentrated in vacuo. Analysis of the unpurified reaction mixture using  $^1\text{H NMR}$  was used to determine  $[E,Z]:[E,E]$  ratio.

### Representative Procedure for Ni-Catalyzed Allylation at Ambient Temperature (Scheme 1 and Table 1)

An oven-dried 2-dram vial equipped with a magnetic stir-bar was charged with 9.6 mg (0.0351 mmol) of bis(1,5-cyclooctadiene)nickel, 20.1 mg (0.0351 mmol) of chiral ligand **L3**, and 0.70 mL of THF in a dry-box under an argon atmosphere. The vial was capped and stirred for 5 minutes. Next, 33.7 mg (0.351 mmol) of sorbic aldehyde was added, followed by 70.7 mg (0.421 mmol) of allylboronic acid pinacol ester. The vial was capped, taped with electrical tape, removed from the dry-box, and allowed to stir at ambient temperature for 18 hours. After this time period, deionized water was added and the mixture was allowed to stir for another 10 minutes. The aqueous layer was washed with  $\text{CH}_2\text{Cl}_2$  ( $\times 3$ ), and the combined organic layers were dried with  $\text{Na}_2\text{SO}_4$  and concentrated in vacuo. Analysis of the unpurified reaction mixture using  $^1\text{H NMR}$  was used to determine  $[E,Z]:[E,E]$  ratio. Silica gel chromatography (10:1 hexane:EtOAc) afforded 37.0 mg (77%) of a light yellow oil of the allylation product as a mixture of isomers.

**Representative Procedure for Ni-Catalyzed Allylation at -35 °C (Table 2)**

**In a dry-box freezer:** An oven-dried 2-dram vial equipped with a magnetic stir-bar was charged with 9.6 mg (0.0351 mmol) of bis(1,5-cyclooctadiene)nickel, 20.1 mg (0.0351 mmol) of chiral ligand **L3**, and 0.70 mL of THF in a dry-box under an argon atmosphere. The vial was capped and stirred for 5 minutes. Next, 33.7 mg (0.351 mmol) of sorbic aldehyde was added, and the vial was capped and put into the freezer (temperature: -35 °C) inside the dry-box without stirring. Meanwhile, a syringe containing 70.7 mg (0.421 mmol) of allylboronic acid pinacol ester was put into the same freezer. After 30 minutes, the allylboronic acid pinacol ester was quickly transferred to the reaction vial and the vial resealed. The reaction was kept in the dry-box freezer for 18 hours, and deionized water was added. After stirring for another 10 minutes, the aqueous layer was washed with CH<sub>2</sub>Cl<sub>2</sub> (×3), and the combined organic layers were dried with Na<sub>2</sub>SO<sub>4</sub> and concentrated in vacuo. Analysis of the unpurified reaction mixture using <sup>1</sup>H NMR was used to determine [*E,Z*]:[*E,E*] ratio. Silica gel chromatography (10:1 hexane:EtOAc) afforded 27.1 mg (56%) of a light yellow oil of the allylation product as a mixture of isomers.

**In a cryo-cool:** An oven-dried 6-dram vial equipped with a magnetic stir-bar was charged with 9.6 mg (0.035 mmol) of bis(1,5-cyclooctadiene)nickel, 20.1 mg (0.035 mmol) of chiral ligand **L3**, and 0.70 mL of THF in a dry-box under an argon atmosphere. The vial was capped and stirred for 5 minutes. To a separate oven-dried 1-mL vial was added 33.7 mg (0.351 mmol) of sorbic aldehyde. To a third oven-dried 1-mL vial was added 117 mg (0.701 mmol) of allylboronic acid pinacol ester. After removal of the magnetic stir-bar from the 6-dram vial, the two uncapped 1-mL vials were transferred carefully into the 6-dram vial without mixing the reaction with the two reagents. The vial was capped, taped with electrical tape, removed from the dry-box, and cooled in a cryo-cool at -35 °C. After 30 minutes, the vial was gently shaken to mix the contents of the three vials and then put back to the cryo-cool for another 18 hours. After this time period, 0.6 mL (1.2 mmol) of acetaldehyde was added, followed by warming to ambient temperature over 30 minutes. Deionized water was added, and the mixture was lightly shaken for another 10 minutes. The aqueous layer was washed with CH<sub>2</sub>Cl<sub>2</sub> (×3), and the combined organic layers were dried with Na<sub>2</sub>SO<sub>4</sub> and concentrated in vacuo. Analysis of the unpurified reaction mixture using <sup>1</sup>H NMR was used to determine [*E,Z*]:[*E,E*] ratio. Silica gel chromatography (10:1 hexane:EtOAc) afforded 33.9 mg (70%) of a light yellow oil of the allylation product as a mixture of isomers.

### Characterization and Proof of Stereochemistry

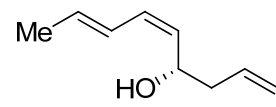
**(*S,5Z,7E*)-nona-1,5,7-trien-4-ol.** A light yellow oil. Single isomer.  $R_f = 0.42$  (3:1 hexane:EtOAc);  $^1\text{H NMR}$  (400 Hz,  $\text{CDCl}_3$ ):  $\delta$  1.60 (1H, d,  $J = 3.6$  Hz, OH), 1.79 (3H, dd,  $J = 6.4$  Hz, 1.6 Hz,  $\text{CH}_3$ ), 2.32 (2H, ddt,  $J = 6.8, 6.0, 1.2$  Hz,  $\text{CH}_2\text{CH}=\text{CH}_2$ ), 4.63 (1H, dddd,  $J = 8.8, 6.0, 6.0, 3.2$  Hz,  $\text{CHOH}$ ), 5.12-5.18 (2H, m,  $\text{CH}_2\text{CH}=\text{CH}_2$ ), 5.30 (1H, dd,  $J = 10.8, 8.8$  Hz,  $\text{CH}=\text{CHCHOH}$ ), 5.73-5.88 (2H, m,  $\text{CH}_2\text{CH}=\text{CH}_2$  and  $\text{CH}_3\text{CH}=\text{CH}$ ), 6.04 (1H, dd,  $J = 11.2, 10.8$  Hz,  $\text{CH}=\text{CHCHOH}$ ), 6.35 (1H, ddq,  $J = 14.8, 11.4, 1.2$  Hz,  $\text{CH}_3\text{CH}=\text{CH}$ );  $^{13}\text{C NMR}$  (100 Hz,  $\text{CDCl}_3$ ):  $\delta$  134.3, 132.1, 130.7, 130.4, 126.6, 118.3, 67.3, 42.3, 18.5 ppm; IR (neat): 3349.4 (br), 3076.5 (w), 3021.8 (m), 2978.7 (w), 2914.2 (m), 2852.4 (m), 1654.9 (m), 1641.0 (m), 1433.7 (m), 1376.2 (m), 1306.3 (m), 1019.6 (s), 982.2 (s), 946.3 (s), 912.7 (s)  $\text{cm}^{-1}$ ; HRMS (ESI+) for  $\text{C}_9\text{H}_{13}$  [ $\text{M}+\text{H}-\text{H}_2\text{O}$ ]: calculated 121.1017, found: 121.1017;  $[\alpha]_D^{20} = -2.3$  ( $c = 0.42, \text{CHCl}_3$ ).

**Proof of Stereochemistry:** Enantioselectivities were determined by comparison of the acylated product with authentic racemic material prepared using tricyclohexylphosphine as the achiral ligand in the allylation reaction. Absolute stereochemistry was determined by converting the allylation product to benzoate, followed by ozonolysis/reduction, and converting the corresponding diol to tribenzoate, as shown below. The resulting tribenzoate was compared on chiral SFC to butane-1,2,4-triyl tribenzoate and (*S*)-butane-1,2,4-triyl tribenzoate which were derived from commercially available butane-1,2,4-triol and (*S*)-1,2,4-triol respectively.

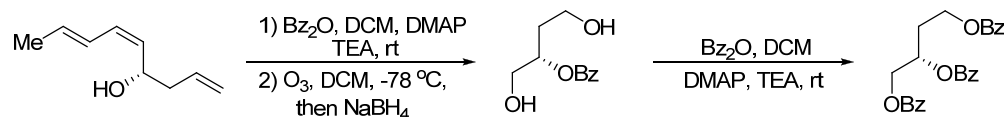

Chiral GLC ( $\beta$ -dex, supelco, 100 °C, 20 psi) - analysis of the acetate of (*SZ,7E*)-nona-1,5,7-trien-4-ol

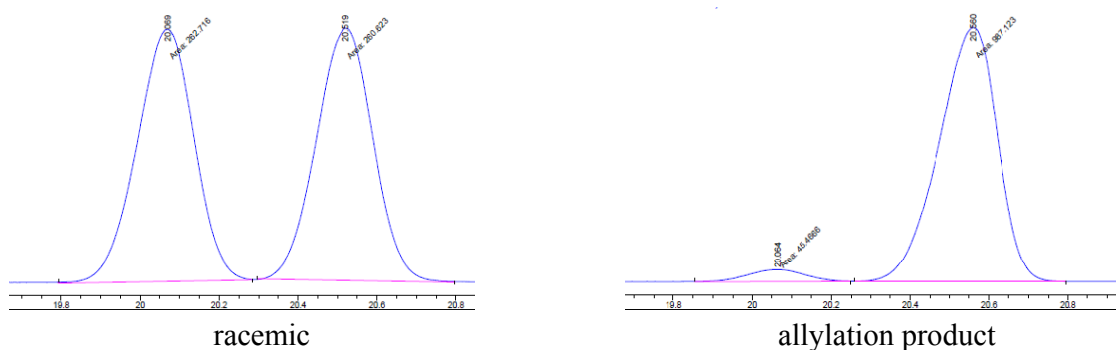

| Peak # | RetTime [min] | Type | Width [min] | Area [pA*s] | Height [pA] | Area %   |
|--------|---------------|------|-------------|-------------|-------------|----------|
| 1      | 20.064        | MM   | 0.1692      | 45.46656    | 4.47819     | 4.40316  |
| 2      | 20.560        | MM   | 0.1709      | 987.12329   | 96.24561    | 95.59684 |

Chiral SFC (OD-H, Chiralpak, 220 nm, 3.0 mL/min, 3.0% MeOH, 150 psi, 50 °C) – analysis of butane-1,2,4-triyl tribenzoate

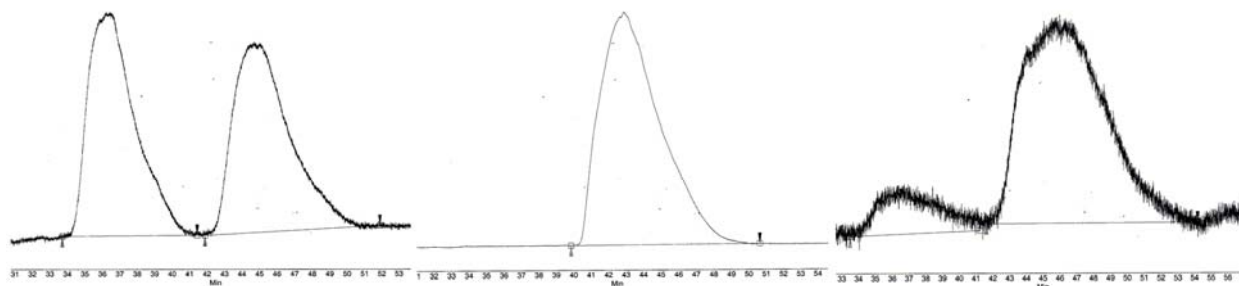

racemic tribenzoate

| Start [Min] | Time [Min] | End [Min] | RT Offset [Min] | Quantity [% Area] | Height [μV] | Area [μV.Min] | Area [%] |
|-------------|------------|-----------|-----------------|-------------------|-------------|---------------|----------|
| 33.71       | 36.39      | 41.43     | 0.00            | 49.69             | 572.5       | 1800.0        | 49.694   |
| 41.88       | 44.69      | 51.89     | 0.00            | 50.31             | 489.7       | 1822.1        | 50.306   |
|             |            |           |                 | 100.00            | 1062.2      | 3622.1        | 100.000  |

S-tribenzoate

| Start [Min] | Time [Min] | End [Min] | RT Offset [Min] | Quantity [% Area] | Height [μV] | Area [μV.Min] | Area [%] |
|-------------|------------|-----------|-----------------|-------------------|-------------|---------------|----------|
| 39.85       | 42.98      | 50.63     | 0.00            | 100.00            | 7144.1      | 28677.1       | 100.000  |
|             |            |           |                 | 100.00            | 7144.1      | 28677.1       | 100.000  |

tribenzoate derived from allylation product

| Start [Min] | Time [Min] | End [Min] | RT Offset [Min] | Quantity [% Area] | Height [μV] | Area [μV.Min] | Area [%] |
|-------------|------------|-----------|-----------------|-------------------|-------------|---------------|----------|
| 33.50       | 36.39      | 41.24     | 0.00            | 14.00             | 64.1        | 273.1         | 14.001   |
| 41.62       | 45.73      | 54.18     | 0.00            | 86.00             | 292.2       | 1677.2        | 85.999   |
|             |            |           |                 | 100.00            | 356.3       | 1950.3        | 100.000  |



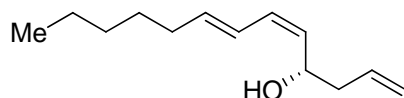

**(*S,5Z,7E*)-trideca-1,5,7-trien-4-ol.** A colorless oil. Mixture of isomers (24:1 [*E,Z*]:[*E,E*]).  $R_f = 0.59$  (3:1 hexane:EtOAc);  $^1\text{H}$  NMR (400 Hz,  $\text{CDCl}_3$ ):  $\delta$  0.88 (3H, t,  $J = 6.8$  Hz,  $\text{CH}_3$ ), 1.26-1.41 (6H, m,  $\text{CH}_3(\text{CH}_2)_3$ ), 1.71 (1H, s, OH), 2.10 (2H, q,  $J = 7.2$  Hz,  $\text{CH}_2\text{CH}=\text{CH}$ ), 2.32 (2H, t,  $J = 6.8$  Hz,  $\text{CH}_2\text{CHOH}$ ), 4.62 (1H, dt,  $J = 8.0, 6.4$  Hz,  $\text{CHOH}$ ), 5.11-5.17 (2H, m,  $\text{CH}_2\text{CH}=\text{CH}_2$ ), 5.30 (1H, dd,  $J = 10.4, 9.2$  Hz,  $\text{CH}=\text{CHCHOH}$ ), 5.71-5.87 (2H, m,  $\text{CH}_2\text{CH}=\text{CH}_2$  and  $\text{CH}_2\text{CH}=\text{CH}$ ), 6.03 (1H, t,  $J = 11.0$  Hz,  $\text{CH}=\text{CHCHOH}$ ), 6.31 (1H, ddt,  $J = 14.8, 11.2, 0.8$  Hz,  $\text{CH}_2\text{CH}=\text{CH}$ );  $^{13}\text{C}$  NMR (100 Hz,  $\text{CDCl}_3$ ):  $\delta$  137.8, 134.3, 130.9, 130.5, 125.2, 118.3, 67.3, 42.3, 33.0, 31.7, 29.1, 22.7, 14.3 ppm; IR (neat): 3367.7 (br), 3076.4 (m), 2956.4 (s), 2925.4 (m), 2856.7 (m), 1692.3 (m), 1641.0 (m), 1458.8 (m), 1433.1 (m), 1378.4 (m), 1307.7 (m), 1021.2 (s), 984.4 (s), 946.9 (s), 912.2 (s)  $\text{cm}^{-1}$ ; HRMS (ESI+) for  $\text{C}_{13}\text{H}_{21}$  [ $\text{M}+\text{H}-\text{H}_2\text{O}$ ]: calculated 177.1643, found: 177.1639;  $[\alpha]_D^{20} = -1.2$  ( $c = 1.41$ ,  $\text{CHCl}_3$ ).

**Proof of Stereochemistry:** Enantioselectivities were determined by comparison with authentic racemic material prepared using tricyclohexylphosphine as the achiral ligand in the allylation reaction. Absolute stereochemistry was determined by converting the allylation product to butane-1,2,4-triyl tribenzoate as described for (*S,5Z,7E*)-nona-1,5,7-trien-4-ol. The resulting tribenzoate was compared on chiral SFC to butane-1,2,4-triyl tribenzoate and (*S*)-butane-1,2,4-triyl tribenzoate derived from commercially available butane-1,2,4-triol and (*S*)-1,2,4-triol, respectively.

Chiral HPLC (AS, Chiralcel, 0.5 mL/min, 0% Isopropanol, 220 nm) – analysis of (*5Z,7E*)-trideca-1,5,7-trien-4-ol

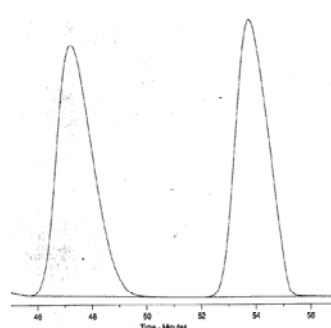

Racemic

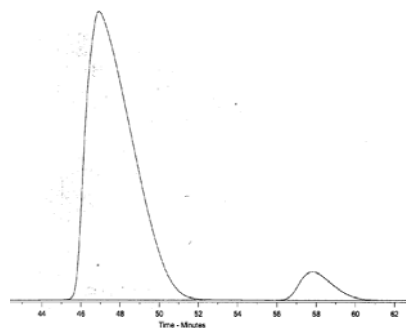

allylation product

| Peak # | Ret. Time | Name | Amount | Amt % | Area      | Area % | Type | Width |
|--------|-----------|------|--------|-------|-----------|--------|------|-------|
| 1      | 46.94     |      | 0.00   | N/A   | 100919500 | 93.288 | BB   | 2.64  |
| 2      | 57.83     |      | 0.00   | N/A   | 7261621   | 6.712  | BB   | 1.88  |

Chiral SFC (OD-H, Chiralpak, 220 nm, 3.0 mL/min, 3.0% MeOH, 150 psi, 50 °C) – analysis of butane-1,2,4-triyl tribenzoate

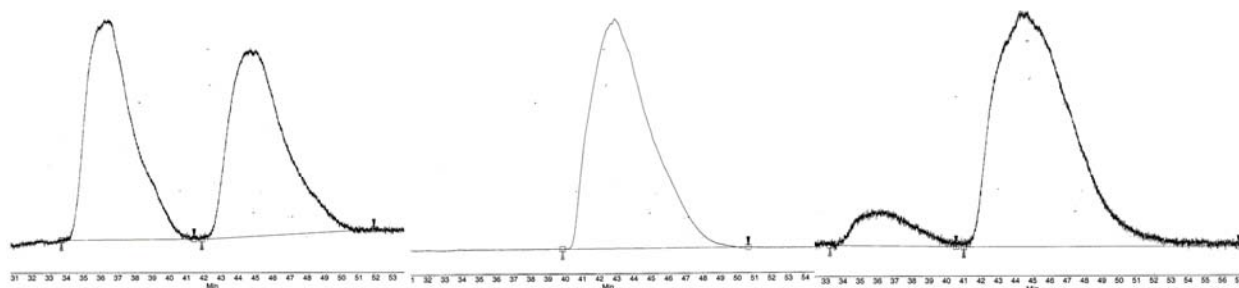

racemic tribenzoate

S-tribenzoate

tribenzoate derived from allylation product

| Start [Min] | Time [Min] | End [Min] | RT Offset [Min] | Quantity [% Area] | Height [μV] | Area [μV.Min] | Area [%] |
|-------------|------------|-----------|-----------------|-------------------|-------------|---------------|----------|
| 33.71       | 36.39      | 41.43     | 0.00            | 49.69             | 572.5       | 1800.0        | 49.694   |
| 41.88       | 44.69      | 51.89     | 0.00            | 50.31             | 489.7       | 1822.1        | 50.306   |
|             |            |           |                 | 100.00            | 1062.2      | 3622.1        | 100.000  |

| Start [Min] | Time [Min] | End [Min] | RT Offset [Min] | Quantity [% Area] | Height [μV] | Area [μV.Min] | Area [%] |
|-------------|------------|-----------|-----------------|-------------------|-------------|---------------|----------|
| 39.85       | 42.90      | 50.63     | 0.00            | 100.00            | 7144.1      | 26077.1       | 100.000  |
|             |            |           |                 | 100.00            | 7144.1      | 26077.1       | 100.000  |

| Start [Min] | Time [Min] | End [Min] | RT Offset [Min] | Quantity [% Area] | Height [μV] | Area [μV.Min] | Area [%] |
|-------------|------------|-----------|-----------------|-------------------|-------------|---------------|----------|
| 33.25       | 35.94      | 40.55     | 0.00            | 9.83              | 130.9       | 516.3         | 9.829    |
| 41.01       | 44.37      | 56.98     | 0.00            | 90.17             | 903.5       | 4736.3        | 90.171   |
|             |            |           |                 | 100.00            | 1034.4      | 5252.6        | 100.000  |

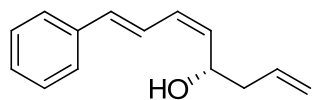

**(*S,5Z,7E*)-8-phenylocta-1,5,7-trien-4-ol.** A yellow oil. Mixture of isomers (24:1 [*E,Z*]:[*E,E*]).  $R_f = 0.33$  (3:1 hexane:EtOAc);  $^1\text{H NMR}$  (400 Hz,  $\text{CDCl}_3$ ):  $\delta$  1.87 (1H, s, OH), 2.38 (2H, t,  $J = 6.8$  Hz,  $\text{CH}_2\text{CH}=\text{CH}_2$ ), 4.76 (1H, dt,  $J = 8.0, 6.8$  Hz, CHOH), 5.14-5.21 (2H, m,  $\text{CH}_2\text{CH}=\text{CH}_2$ ), 5.51 (1H, dd,  $J = 10.8, 8.8$  Hz,  $\text{CH}=\text{CHCHOH}$ ), 5.85 (1H, ddt,  $J = 17.2, 10.0, 7.2$  Hz,  $\text{CH}_2\text{CH}=\text{CH}_2$ ), 6.24 (1H, t,  $J = 11.2$  Hz,  $\text{CH}=\text{CHCHOH}$ ), 6.59 (1H, d,  $J = 15.2$ , PhCH=CH), 7.07 (1H, dd,  $J = 15.6, 11.2$  Hz, PhCH=CH), 7.25 (1H, t,  $J = 7.2$  Hz, para-Ph-H), 7.33 (2H, dd,  $J = 8.0, 7.2$  Hz, meta-Ph-H), 7.42 (2H, dd,  $J = 8.0, 0.8$  Hz, ortho-Ph-H);  $^{13}\text{C NMR}$  (100 Hz,  $\text{CDCl}_3$ ):  $\delta$  137.1, 134.6, 134.1, 133.3, 130.6, 128.8, 128.0, 128.6, 123.8, 118.5, 67.5, 42.3 ppm; IR (neat): 3361.3 (br), 3077.1 (m), 3027.4 (m), 2978.4 (m), 2906.9 (m), 1638.9 (m), 1597.4 (w), 1493.4 (m), 1448.8 (m), 1306.3 (m), 989.2 (s), 946.1 (s), 916.2 (s), 858.4 (s)  $\text{cm}^{-1}$ ; HRMS (ESI+) for  $\text{C}_{14}\text{H}_{15}$  [ $\text{M}+\text{H}-\text{H}_2\text{O}$ ]: calculated 183.1174, found: 183.1177;  $[\alpha]_{\text{D}}^{20} = +3.22$  ( $c = 1.41$ ,  $\text{CHCl}_3$ ).

**Proof of Stereochemistry:** Enantioselectivities were determined by comparison with authentic racemic material prepared using tricyclohexylphosphine as the achiral ligand in the allylation reaction. Absolute stereochemistry was determined by converting the allylation product to butane-1,2,4-triyl tribenzoate as described for (*S,5Z,7E*)-nona-1,5,7-trien-4-ol. The resulting tribenzoate was compared on chiral SFC to butane-1,2,4-triyl tribenzoate and (*S*)-butane-1,2,4-triyl tribenzoate derived from commercially available butane-1,2,4-triol and (*S*)-1,2,4-triol, respectively.

Chiral HPLC (OD, Chiralcel, 1.0 mL/min, 1.0% Isopropanol, 220 nm) – analysis of (*5Z,7E*)-8-phenylocta-1,5,7-trien-4-ol

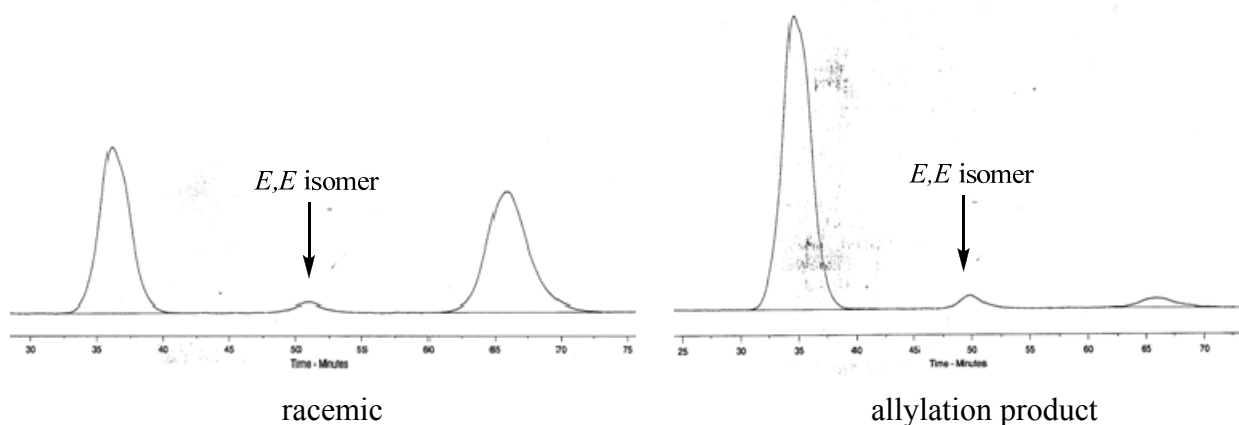

| Peak # | Ret. Time | Name | Amount | Amt % | Area    | Area % | Type | Width |
|--------|-----------|------|--------|-------|---------|--------|------|-------|
| 1      | 34.73     |      | 0.00   | N/A   | 9043018 | 96.063 | BB   | 2.68  |
| 2      | 65.83     |      | 0.00   | N/A   | 370651  | 3.937  | BB   | 3.31  |

Chiral SFC (OD-H, Chiralpak, 220 nm, 3.0 mL/min, 3.0% MeOH, 150 psi, 50 °C) – analysis of butane-1,2,4-triyl tribenzoate

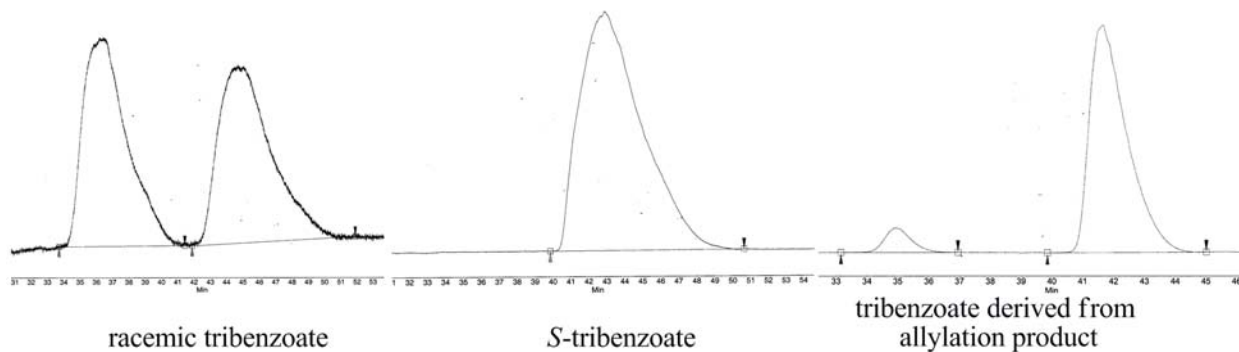

| Start | Time  | End   | RT Offset | Quantity | Height     | Area           | Area    |
|-------|-------|-------|-----------|----------|------------|----------------|---------|
| [Min] | [Min] | [Min] | [Min]     | [% Area] | [ $\mu$ V] | [ $\mu$ V.Min] | [%]     |
| 33.71 | 36.39 | 41.43 | 0.00      | 49.69    | 572.5      | 1800.0         | 49.694  |
| 41.88 | 44.69 | 51.89 | 0.00      | 50.31    | 489.7      | 1822.1         | 50.306  |
|       |       |       |           | 100.00   | 1062.2     | 3622.1         | 100.000 |

| Start | Time  | End   | RT Offset | Quantity | Height     | Area           | Area    |
|-------|-------|-------|-----------|----------|------------|----------------|---------|
| [Min] | [Min] | [Min] | [Min]     | [% Area] | [ $\mu$ V] | [ $\mu$ V.Min] | [%]     |
| 39.85 | 42.90 | 50.53 | 0.00      | 100.00   | 7144.1     | 26077.1        | 100.000 |
|       |       |       |           | 100.00   | 7144.1     | 26077.1        | 100.000 |

| Start | Time  | End   | RT Offset | Quantity | Height     | Area           | Area    |
|-------|-------|-------|-----------|----------|------------|----------------|---------|
| [Min] | [Min] | [Min] | [Min]     | [% Area] | [ $\mu$ V] | [ $\mu$ V.Min] | [%]     |
| 33.16 | 34.93 | 36.96 | 0.00      | 7.02     | 157.6      | 156.7          | 7.025   |
| 39.86 | 41.67 | 45.01 | 0.00      | 92.98    | 1470.5     | 2074.2         | 92.975  |
|       |       |       |           | 100.00   | 1628.2     | 2231.0         | 100.000 |

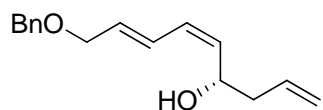

**(S,5Z,7E)-9-(benzyloxy)nona-1,5,7-trien-4-ol.** A yellow oil. Mixture of isomers (18:1 [*E,Z*]:[*E,E*]).  $R_f = 0.24$  (3:1 hexane:EtOAc);  $^1\text{H NMR}$  (500 Hz,  $\text{CDCl}_3$ ):  $\delta$  1.67 (1H, d,  $J = 2.5$  Hz, OH), 2.32 (2H, tt,  $J = 7.0, 0.5$  Hz,  $\text{CH}_2\text{CH}=\text{CH}_2$ ), 4.09 (2H, d,  $J = 4.5$  Hz,  $\text{OCH}_2\text{CH}=\text{CH}$ ), 4.53 (1H, s,  $\text{PhCH}_2\text{O}$ ), 4.63 (1H, m, CHOH), 5.13-5.18 (2H, m,  $\text{CH}_2\text{CH}=\text{CH}_2$ ), 5.44 (1H, dd,  $J = 10.5, 9.5$  Hz,  $\text{CH}=\text{CHCHOH}$ ), 5.77-5.88 (2H, m,  $\text{OCH}_2\text{CH}=\text{CH}$  and  $\text{CH}_2\text{CH}=\text{CH}_2$ ), 6.09 (1H, t,  $J = 11.5$  Hz,  $\text{CH}=\text{CHCHOH}$ ), 6.58 (1H, ddd,  $J = 15.5, 12.0, 1.5$  Hz,  $\text{OCH}_2\text{CH}=\text{CH}$ ), 7.28-7.36 (5H, m, Ph-H);  $^{13}\text{C NMR}$  (125 Hz,  $\text{CDCl}_3$ ):  $\delta$  138.3, 134.1, 133.3, 132.2, 129.8, 128.6, 180.0, 127.9, 127.4, 118.6, 72.5, 70.4, 67.2, 42.2 ppm; IR (neat): 3390.1 (br), 3066.2 (m), 3027.8 (m), 292.8 (m), 2853.4 (m), 1640.5 (m), 143.8 (m), 1358.5 (m), 1305.9 (w), 1206.6 (w), 1102.2 (s), 1046.5 (s), 1027.1 (s), 989.5 (s), 915.6 (s), 737.5 (s)  $\text{cm}^{-1}$ ; HRMS (ESI+) for  $\text{C}_{16}\text{H}_{19}\text{O}$  [ $\text{M}+\text{H}-\text{H}_2\text{O}$ ]: calculated 227.1436, found: 227.1438;  $[\alpha]_D^{20} = -4.32$  ( $c = 0.66$ ,  $\text{CHCl}_3$ ).

**Proof of Stereochemistry:** Enantioselectivities were determined by comparison with authentic racemic material prepared using tricyclohexylphosphine as the achiral ligand in the allylation reaction. The absolute stereochemistry was assigned by analogy.

Chiral SFC (AD-H, Chiralpak, 220 nm, 3.0 mL/min, 3.0% MeOH, 150 psi, 50 °C) – analysis of (5Z,7E)-9-(benzyloxy)nona-1,5,7-trien-4-ol

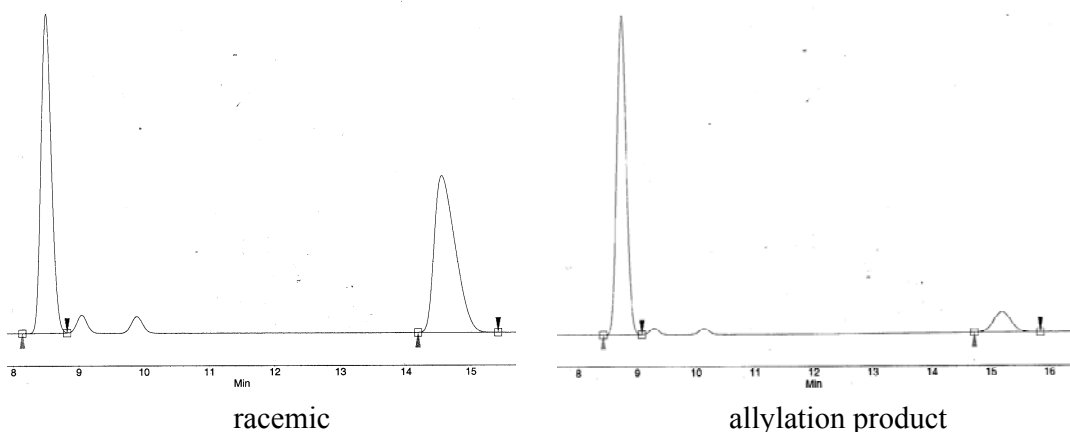

| Index | Name    | Start [Min] | Time [Min] | End [Min] | RT Offset [Min] | Quantity [% Area] | Height [ $\mu\text{V}$ ] | Area [ $\mu\text{V}\cdot\text{Min}$ ] | Area [%] |
|-------|---------|-------------|------------|-----------|-----------------|-------------------|--------------------------|---------------------------------------|----------|
| 1     | UNKNOWN | 8.42        | 8.73       | 9.08      | 0.00            | 89.43             | 11834.1                  | 2205.7                                | 89.426   |
| 2     | UNKNOWN | 14.71       | 15.18      | 15.84     | 0.00            | 10.57             | 733.2                    | 260.8                                 | 10.574   |
| Total |         |             |            |           |                 | 100.00            | 12567.3                  | 2466.5                                | 100.000  |

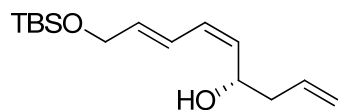**(*S,5Z,7E*)-9-(*tert*-butyldimethylsilyloxy)nona-1,5,7-trien-4-ol.** A

light yellow oil. Single isomer.  $R_f = 0.43$  (3:1 hexane:EtOAc);  $^1\text{H NMR}$  (400 Hz,  $\text{CDCl}_3$ ):  $\delta$  0.08 (6H, s,  $\text{Si}(\text{CH}_3)_2$ ), 0.92 (1H, s,  $\text{Si}(\text{CH}_3)_3$ ), 1.63 (1H, d,  $J = 3.2$  Hz, OH), 2.32 (2H, t,  $J = 6.8$  Hz,  $\text{CH}_2\text{CH}=\text{CH}_2$ ), 4.24 (2H, dd,  $J = 4.4, 1.6$  Hz,  $\text{SiOCH}_2\text{CH}=\text{CH}$ ), 4.64 (1H, dddd,  $J = 8.8, 6.4, 6.0, 2.4$  Hz,  $\text{CHOH}$ ), 5.12-5.18 (2H, m,  $\text{CH}_2\text{CH}=\text{CH}_2$ ), 5.40 (1H, dd,  $J = 10.8, 8.8$  Hz,  $\text{CH}=\text{CHCHOH}$ ), 5.76-5.86 (2H, m,  $\text{CH}_2\text{CH}=\text{CH}_2$  and  $\text{SiOCH}_2\text{CH}=\text{CH}$ ), 6.08 (1H, dd,  $J = 11.2, 10.8$  Hz,  $\text{CH}=\text{CHCHOH}$ ), 6.54 (1H, ddq,  $J = 14.0, 11.2, 1.2$  Hz,  $\text{SiOCH}_2\text{CH}=\text{CH}$ );  $^{13}\text{C NMR}$  (100Hz,  $\text{CDCl}_3$ ):  $\delta$  135.2, 134.2, 132.5, 129.8, 124.4, 118.4, 67.5, 63.5, 42.3, 26.2, 18.7, -4.93, -4.94 ppm; IR (neat): 3380.1 (br), 3077.2 (w), 3009.9 (m), 2954.4 (m), 2895.7 (m), 2856.4 (m), 1641.2 (w), 1471.5 (m), 1362.4 (m), 1253.7 (m), 1100.9 (br), 1007.2 (br), 831.9 (s), 744.2 (s)  $\text{cm}^{-1}$ ; HRMS (ESI+) for  $\text{C}_{15}\text{H}_{27}\text{OSi}$  [ $\text{M}+\text{H}-\text{H}_2\text{O}$ ]: calculated 251.1831, found: 251.1821;  $[\alpha]_D^{20} = -5.94$  ( $c = 0.83$ ,  $\text{CHCl}_3$ ).

**Proof of Stereochemistry:** Enantioselectivities were determined by comparison with authentic racemic material prepared using tricyclohexylphosphine as the achiral ligand in the allylation reaction. Absolute stereochemistry was determined by converting the allylation product to butane-1,2,4-triyl tribenzoate as described for (*S,5Z,7E*)-nona-1,5,7-trien-4-ol. The resulting tribenzoate was compared on chiral SFC to butane-1,2,4-triyl tribenzoate and (*S*)-butane-1,2,4-triyl tribenzoate derived from commercial available butane-1,2,4-triol and (*S*)-1,2,4-triol, respectively.

Chiral SFC (AD-H, Chiralpak, 220 nm, 1.0 mL/min, 1.5% MeOH, 150 psi, 50 °C) – analysis of (*S,5Z,7E*)-9-(*tert*-butyldimethylsilyloxy)nona-1,5,7-trien-4-ol

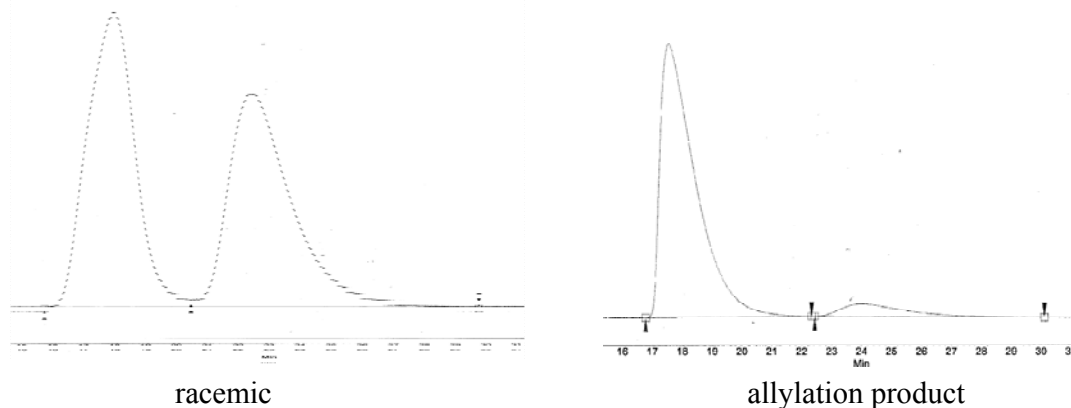

| Index | Name    | Min   |       |       |           | Quantity | Height            | Area                             | Area    |
|-------|---------|-------|-------|-------|-----------|----------|-------------------|----------------------------------|---------|
|       |         | Start | Time  | End   | RT Offset |          |                   |                                  |         |
|       |         | [Min] | [Min] | [Min] | [Min]     | [% Area] | [ $\mu\text{V}$ ] | [ $\mu\text{V}\cdot\text{Min}$ ] | [%]     |
| 1     | UNKNOWN | 16.79 | 17.55 | 22.33 | 0.00      | 92.41    | 5295.4            | 7256.0                           | 92.408  |
| 2     | UNKNOWN | 22.43 | 24.04 | 30.11 | 0.00      | 7.59     | 240.4             | 596.1                            | 7.592   |
| Total |         |       |       |       |           | 100.00   | 5535.8            | 7852.1                           | 100.000 |

Chiral SFC (OD-H, Chiralpak, 220 nm, 3.0 mL/min, 3.0% MeOH, 150 psi, 50 °C) – analysis of butane-1,2,4-triyl tribenzoate

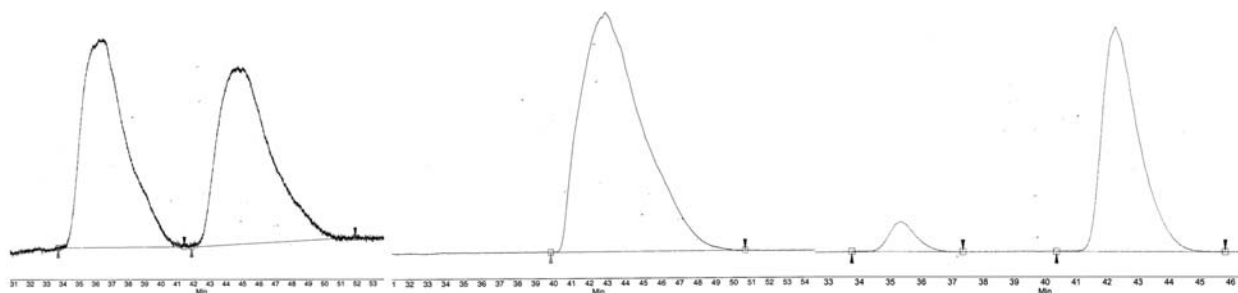

racemic tribenzoate

| Start | Time  | End   | RT Offset | Quantity | Height     | Area           | Area    |
|-------|-------|-------|-----------|----------|------------|----------------|---------|
| [Min] | [Min] | [Min] | [Min]     | [% Area] | [ $\mu$ V] | [ $\mu$ V.Min] | [%]     |
| 33.71 | 36.39 | 41.43 | 0.00      | 49.69    | 572.5      | 1800.0         | 49.694  |
| 41.88 | 44.69 | 51.89 | 0.00      | 50.31    | 489.7      | 1822.1         | 50.306  |
|       |       |       |           | 100.00   | 1062.2     | 3622.1         | 100.000 |

S-tribenzoate

| Start | Time  | End   | RT Offset | Quantity | Height     | Area           | Area    |
|-------|-------|-------|-----------|----------|------------|----------------|---------|
| [Min] | [Min] | [Min] | [Min]     | [% Area] | [ $\mu$ V] | [ $\mu$ V.Min] | [%]     |
| 39.85 | 42.90 | 50.63 | 0.00      | 100.00   | 7144.1     | 28977.1        | 100.000 |
|       |       |       |           | 100.00   | 7144.1     | 28977.1        | 100.000 |

tribenzoate derived from allylation product

| Start | Time  | End   | RT Offset | Quantity | Height     | Area           | Area    |
|-------|-------|-------|-----------|----------|------------|----------------|---------|
| [Min] | [Min] | [Min] | [Min]     | [% Area] | [ $\mu$ V] | [ $\mu$ V.Min] | [%]     |
| 33.76 | 35.36 | 37.35 | 0.00      | 8.75     | 121.7      | 119.7          | 8.749   |
| 40.37 | 42.29 | 45.82 | 0.00      | 91.25    | 921.6      | 1248.7         | 91.251  |
|       |       |       |           | 100.00   | 1043.3     | 1368.4         | 100.000 |

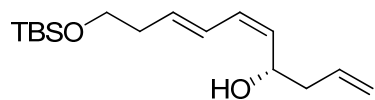

**(S,5Z,7E)-10-(tert-butyldimethylsilyloxy)deca-1,5,7-trien-4-ol.** A yellow oil. Single isomer.  $R_f = 0.51$  (3:1 hexane:EtOAc);  $^1\text{H NMR}$  (400 Hz,  $\text{CDCl}_3$ ):  $\delta$  0.05 (6H, s,  $\text{Si}(\text{CH}_3)_2$ ), 0.89 (9H, s,  $\text{Si}(\text{CH}_3)_3$ ), 1.61 (1H, d,  $J = 4.2$  Hz, OH), 2.33 (4H, m,  $\text{CH}_2\text{CH}=\text{CH}_2$  and  $\text{CH}_2\text{CH}=\text{CH}$ ), 3.66 (2H, t,  $J = 6.6$  Hz,  $\text{SiOCH}_2$ ), 4.62 (1H, m, CHOH), 5.12-5.18 (2H, m,  $\text{CH}_2\text{CH}=\text{CH}_2$ ), 5.33 (1H, dd,  $J = 10.8, 8.8$  Hz,  $\text{CH}=\text{CHCHOH}$ ), 5.71-5.87 (2H, m,  $\text{CH}_2\text{CH}=\text{CH}_2$  and  $\text{CH}_2\text{CH}=\text{CH}$ ), 6.04 (1H, t,  $J = 11.2$  Hz,  $\text{CH}=\text{CHCHOH}$ ), 6.38 (1H, ddt,  $J = 14.8, 11.2, 1.2$  Hz,  $\text{CH}_2\text{CH}=\text{CH}$ );  $^{13}\text{C NMR}$  (125 Hz,  $\text{CDCl}_3$ ):  $\delta$  134.3, 133.8, 131.1, 130.7, 127.0, 118.5, 67.3, 62.9, 42.2, 36.6, 26.1, 18.6, -5.1 ppm; IR (neat): 3361.4 (br), 3077.2 (w), 2954.0 (s), 2929.6 (s), 2898.1 (m), 2857.5 (s), 1471.6 (m), 1255.6 (m), 1100.5 (s), 948.7 (m), 836.2 (s)  $\text{cm}^{-1}$ ; HRMS (ESI+) for  $\text{C}_{16}\text{H}_{29}\text{OSi}$  [ $\text{M}+\text{H}-\text{H}_2\text{O}$ ]: calculated 265.1988, found: 265.1986;  $[\alpha]_{\text{D}}^{20} = 2.34$  ( $c = 1.37$ ,  $\text{CHCl}_3$ ).

**Proof of Stereochemistry:** Enantioselectivities were determined by comparison with authentic racemic material prepared using tricyclohexylphosphine as the achiral ligand in the allylation reaction. The absolute stereochemistry was assigned by analogy.

Chiral SFC (AD-H, Chiralpak, 220 nm, 1.0 mL/min, 2.0% MeOH, 150 psi, 50 °C) – analysis of (S,Z,E)-10-(tert-butyldimethylsilyloxy)deca-1,5,7-trien-4-ol

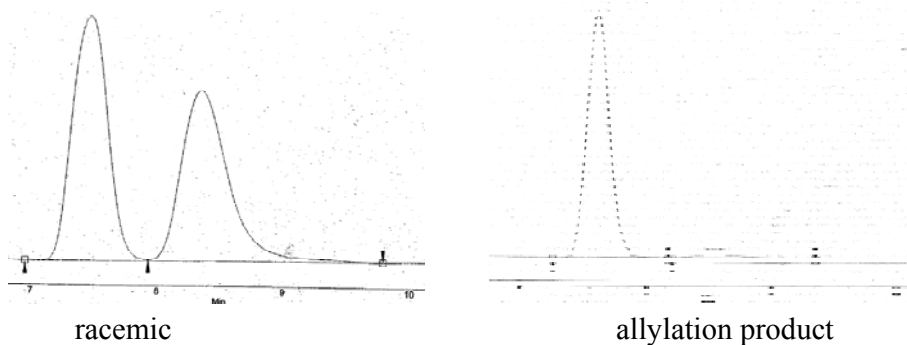

| Index | Name    | Start [Min] | Time [Min] | End [Min] | RT Offset [Min] | Quantity [% Area] | Height [ $\mu\text{V}$ ] | Area [ $\mu\text{V}\cdot\text{Min}$ ] | Area [%] |
|-------|---------|-------------|------------|-----------|-----------------|-------------------|--------------------------|---------------------------------------|----------|
| 1     | UNKNOWN | 7.54        | 7.84       | 8.41      | 0.00            | 94.17             | 5158.7                   | 1045.1                                | 94.171   |
| 2     | UNKNOWN | 8.46        | 8.83       | 9.63      | 0.00            | 5.83              | 206.1                    | 64.7                                  | 5.829    |
| Total |         |             |            |           |                 | 100.00            | 5364.8                   | 1109.8                                | 100.000  |



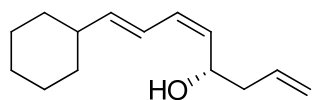

**(S,5Z,7E)-8-cyclohexylocta-1,5,7-trien-4-ol.** A light yellow oil. Mixture of isomers (38:1 [*E,Z*]:[*E,E*]).  $R_f = 0.43$  (3:1 hexane:EtOAc);  $^1\text{H NMR}$  (400 Hz,  $\text{CDCl}_3$ ):  $\delta$  1.05–1.74 (11H, m, ( $\text{CH}_2$ )<sub>5</sub> and OH), 2.03 (1H, dtt,  $J = 7.6, 7.2, 3.6$  Hz,  $\text{CHCH}=\text{CH}$ ), 2.32 (2H, t,  $J = 6.2$  Hz,  $\text{CH}_2\text{CH}=\text{CH}_2$ ), 4.63 (1H, dddd,  $J = 8.8, 6.4, 6.0, 2.4$  Hz,  $\text{CHOH}$ ), 5.11–5.18 (2H, m,  $\text{CH}_2\text{CH}=\text{CH}_2$ ), 5.31 (1H, dd,  $J = 10.0, 8.8$  Hz,  $\text{CH}=\text{CHCHOH}$ ), 5.70 (1H, dd,  $J = 15.2, 7.2$  Hz,  $\text{CHCH}=\text{CH}$ ), 5.83 (1H, dtt,  $J = 17.2, 10.0, 7.2$  Hz,  $\text{CHCH}=\text{CH}_2$ ), 6.03 (1H, dd,  $J = 11.2, 10.8$  Hz,  $\text{CH}=\text{CHCHOH}$ ), 6.27 (1H, dtt,  $J = 15.2, 11.2, 0.8$  Hz,  $\text{CHCH}=\text{CH}$ ) ppm;  $^{13}\text{C NMR}$  (100 Hz,  $\text{CDCl}_3$ ):  $\delta$  143.4, 134.4, 131.2, 130.7, 122.7, 118.3, 67.4, 42.3, 41.2, 33.02, 32.99, 26.4, 26.2 ppm; IR (neat): 3338.5 (br), 3075.3 (w), 3008.0 (w), 2978.6 (w), 2921.9 (s), 2850.1 (s), 1641.2 (m), 1447.5 (m), 1349.3 (br), 1020.2 (s), 984.0 (s), 947.5 (s), 921.1 (s), 839.9 (m)  $\text{cm}^{-1}$ ; HRMS (ESI+) for  $\text{C}_{14}\text{H}_{21}$  [ $\text{M}+1-\text{H}_2\text{O}$ ]: calculated 189.1643, found: 189.1639;  $[\alpha]_D^{20} = -0.91$  ( $c = 1.24$ ,  $\text{CHCl}_3$ ).

**Proof of Stereochemistry:** Enantioselectivities were determined by comparison with authentic racemic material prepared using tricyclohexylphosphine as the achiral ligand in the allylation reaction. The absolute stereochemistry was assigned by analogy.

*Chiral HPLC (AS, Chiralcel, 220 nm, 0.5 mL/min, 0.5% Isopropanol) – analysis of (5Z,7E)-8-cyclohexylocta-1,5,7-trien-4-ol*

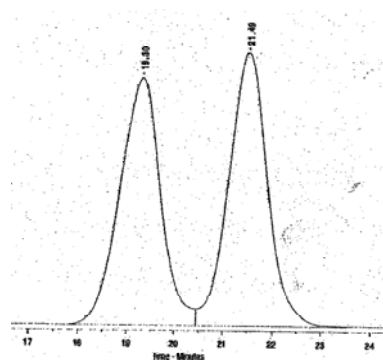

racemic

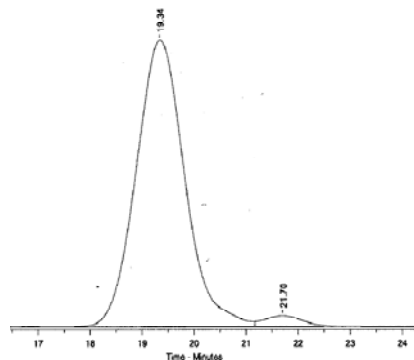

allylation product

| Peak # | Ret. Time | Name | Amount | Amt % | Area     | Area % | Type | Width |
|--------|-----------|------|--------|-------|----------|--------|------|-------|
| 1      | 19.34     |      | 0.00   | N/A   | 41412050 | 97.035 | BV   | 0.99  |
| 2      | 21.70     |      | 0.00   | N/A   | 1265217  | 2.965  | VB   | 0.92  |

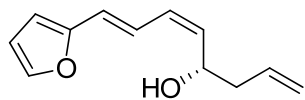

**(S,5Z,7E)-8-(furan-2-yl)octa-1,5,7-trien-4-ol.** A yellow oil. Mixture of isomers (18:1 [E,Z]:[E,E]).  $R_f = 0.28$  (3:1 hexane:EtOAc);  $^1\text{H NMR}$  (400Hz,  $\text{CDCl}_3$ ):  $\delta$  1.76 (1H, d,  $J = 3.2$  Hz, OH), 2.36 (2H, ddt,  $J = 7.2, 6.4, 1.2$  Hz,  $\text{CH}_2\text{CH}=\text{CH}_2$ ), 4.75 (1H, dddd,  $J = 9.6, 6.4, 6.0, 3.2$  Hz, CHOH), 5.13-5.21 (2H, m,  $\text{CH}_2\text{CH}=\text{CH}_2$ ), 5.49 (1H, dd,  $J = 10.0, 9.6$  Hz,  $\text{CH}=\text{CHCHOH}$ ), 5.85 (1H, ddt,  $J = 17.2, 10.4, 7.2$  Hz,  $\text{CH}_2\text{CH}=\text{CH}_2$ ), 6.16 (1H, ddt,  $J = 12.0, 10.4, 0.8$  Hz,  $\text{CH}=\text{CHCHOH}$ ), 6.29-6.40 (3H, m, ArCH=CH, ortho-Ar and meta-Ar), 6.96 (1H, dd,  $J = 15.6, 11.6$  Hz, ArCH=CH), 7.38 (1H, d,  $J = 1.6$  Hz, para-Ar);  $^{13}\text{C NMR}$  (100Hz,  $\text{CDCl}_3$ ):  $\delta$  153.1, 142.6, 134.2, 133.6, 130.2, 122.4, 122.0, 118.6, 111.9, 109.4, 67.4, 42.3 ppm; IR (neat): 3381.7 (br), 3118.2 (w), 3076.0 (w), 3010.9 (m), 2978.2 (w), 2929.4 (m), 1676.1 (w), 1638.5 (m), 1609.6 (w), 1483.7 (m), 1152.1 (m), 1014.4 (s), 984.1 (s), 942.4 (s), 925.2 (s), 735.8 (s)  $\text{cm}^{-1}$ ; HRMS (ESI+) for  $\text{C}_{12}\text{H}_{13}\text{O}$  [M+1- $\text{H}_2\text{O}$ ]: calculated 173.0966, found: 173.0971;  $[\alpha]_D^{20} = 0.65$  ( $c = 1.12$ ,  $\text{CHCl}_3$ ).

**Proof of Stereochemistry:** Enantioselectivities were determined by comparison with authentic racemic material prepared using tricyclohexylphosphine as the achiral ligand in the allylation reaction. The absolute stereochemistry was assigned by analogy.

Chiral SFC (AD-H, Chiralpak, 220 nm, 5.0 mL/min, 5.0% MeOH, 150 psi, 50 °C) – analysis of (5Z,7E)-8-(furan-2-yl)octa-1,5,7-trien-4-ol

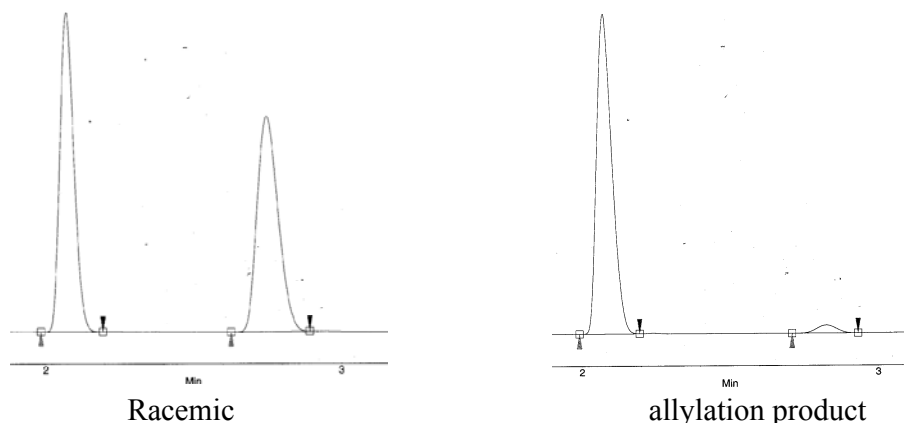

| Index | Name    | Start Time [Min] | End Time [Min] | RT Offset [Min] | Quantity [% Area] | Height [ $\mu\text{V}$ ] | Area [ $\mu\text{V}\cdot\text{Min}$ ] | Area [%] |         |
|-------|---------|------------------|----------------|-----------------|-------------------|--------------------------|---------------------------------------|----------|---------|
| 1     | UNKNOWN | 1.99             | 2.07           | 2.19            | 0.00              | 96.87                    | 32872.4                               | 1966.2   | 96.873  |
| 2     | UNKNOWN | 2.71             | 2.82           | 2.93            | 0.00              | 3.13                     | 820.9                                 | 63.5     | 3.127   |
| Total |         |                  |                |                 |                   | 100.00                   | 33693.3                               | 2029.7   | 100.000 |

### Procedure for Functionalization of (*S*,*5Z*,*7E*)-nona-1,5,7-trien-4-ol (Scheme 2)

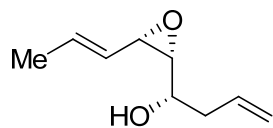

**(*S*)-1-((*2R*,*3S*)-3-((*E*)-prop-1-enyl)oxiran-2-yl)but-3-en-1-ol.** A flame-dried 25-mL round-bottom-flask equipped with a magnetic stir-bar was charged with 221 mg (1.60 mmol) of (*S*,*5Z*,*7E*)-nona-1,5,7-trien-4-ol, 8.01 mL of THF, and 336 mg (4.01 mmol) of NaHCO<sub>3</sub>. The flask was sealed with septum and cooled in a cryo-cool to -20 °C under N<sub>2</sub>. After 30 minutes, mCPBA (77%) was added as a white powder, and the mixture was allowed to stir at this temperature for another 4 hours. Then, the reaction was filtered through a plug of silica gel (prewashed with 5% triethylamine in ether), washed with ether, and concentrated under reduced pressure. The crude material was purified by silica gel (prewashed with 5% triethylamine in ether) chromatography (3:1 pentane:ether) to afford 195.0 mg (79%) of the title compound as light yellow oil and as a mixture of diastereomers (40:1 *d.r.*).  $R_f = 0.59$  (1:1 hexane/EtOAc, stain in KMnO<sub>4</sub>). <sup>1</sup>H NMR (400 Hz, CDCl<sub>3</sub>): δ 1.76 (3H, dd,  $J = 6.8, 1.6$  Hz, CH<sub>3</sub>), 2.12 (1H, s, OH), 2.33 (2H, m, CH<sub>2</sub>CH=CH<sub>2</sub>), 3.06 (1H, dd,  $J = 8.0, 4.4$  Hz, CHOCHCHOH), 3.49 (1H, dd,  $J = 8.0, 4.4$  Hz, CHOCHCHOH), 3.60 (1H, dtd,  $J = 7.6, 6.0, 4.0$  Hz, CHOH), 5.12-5.18 (2H, m, CH<sub>2</sub>CH=CH<sub>2</sub>), 5.33 (1H, ddd,  $J = 15.2, 8.0, 1.2$  Hz, CH<sub>3</sub>CH=CH), 5.82 (1H, ddt,  $J = 17.2, 10.4, 6.8$  Hz, CH<sub>2</sub>CH=CH<sub>2</sub>), 5.97 (1H, dq,  $J = 15.2, 6.4$  Hz, CH<sub>3</sub>CH=CH); <sup>13</sup>C NMR (100Hz, CDCl<sub>3</sub>): δ 133.9, 133.5, 124.9, 118.4, 69.4, 61.8, 58.0, 38.7, 18.3 ppm; IR (neat): 3415.0 (br), 3077.0 (w), 3003.5 (m), 2970.6 (m), 2919.7 (m), 2857.1 (w), 1668.3 (w), 1641.9 (m), 1436.2 (m), 1378.2 (w), 1295.1 (br), 1047.3 (m), 963.5 (s), 914.4 (s), 873.4 (m) cm<sup>-1</sup>; HRMS (ESI+) for C<sub>9</sub>H<sub>13</sub>O [M+H-H<sub>2</sub>O]: calculated: 137.0966, found: 137.0973;  $[\alpha]_D^{20} = +1.53$  ( $c = 0.70$ , CHCl<sub>3</sub>).

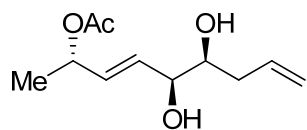

**(*2S*,*5S*,*6S*,*E*)-5,6-dihydroxynona-3,8-dien-2-yl acetate.** An oven-dried 2-dram vial was charged with 7.5 mg (0.0065 mmol) of tetrakis(triphenylphosphine)palladium, 0.20 mL of THF, and 5.8 mg (0.098 mmol) of acetic acid in a dry-box under an argon atmosphere. The vial was capped with a septum, taped with electrical tape, and removed from the dry-box. The reaction mixture was cooled in a ice-water bath for 30 minutes, and then 10.0 mg (0.0650 mmol) of (*S*)-1-((*2R*,*3S*)-3-((*E*)-prop-1-enyl)oxiran-2-yl)but-3-en-1-ol was added dropwise to the reaction vial as a solution in 0.14 mL of THF. The reaction was allowed to stir at 0 °C for 1 hour, followed by another 3 hours at ambient temperature. After this time period, the reaction was cooled to 0 °C again, followed by addition of about 10 μL of H<sub>2</sub>O<sub>2</sub> (30% in water). Saturated NaHCO<sub>3</sub> and ether were added and stirring continuously for 5 minutes, and the layers were separated. The aqueous layer was extracted with ether (×3), and the organic layers were filtered through a plug of MgSO<sub>4</sub> (top) and silica gel (bottom). Solvent was evaporated *in vacuo*. The crude material was purified by silica gel chromatography (1:1 pentane:ether) to afford 8.1 mg (58%) of the title compound (10:1 *I,4:I,2*) as a colorless oil.  $R_f = 0.2$  (1:1 hexane/EtOAc, stain in KMnO<sub>4</sub>). <sup>1</sup>H NMR (500 Hz, CDCl<sub>3</sub>): δ 1.32 (3H, d,  $J = 6.5$  Hz, CH<sub>3</sub>CHOAc), 2.05 (3H, s, CH<sub>3</sub>C(O)), 2.15-2.38 (4H, m, CH<sub>2</sub>CH=CH<sub>2</sub> and 2 OHs), 3.55 (1H, ddt,  $J = 8.0, 6.0, 4.0$  Hz, CHOHCH<sub>2</sub>), 3.98 (1H, m, CH=CHCHOH), 5.13-5.17 (2H, m, CH<sub>2</sub>CH=CH<sub>2</sub>), 5.36 (1H, p,  $J = 6.5$  Hz, CH<sub>3</sub>CHOAc), 5.77-5.89 (3H, m, CH=CH and CH<sub>2</sub>CH=CH<sub>2</sub>); <sup>13</sup>C NMR (125 Hz, CDCl<sub>3</sub>): δ 170.5, 134.3, 133.2, 130.9, 118.7, 74.9, 73.6, 70.4, 37.8, 21.6, 20.4 ppm; IR (neat): 3387.1 (br), 3114.3 (w), 2979.2 (w), 2930.9 (w), 2033.3 (w), 2005.8 (w), 1735.7 (s), 1641.5 (w), 1432.0 (w), 1372.4 (m), 1242.5 (s), 1043.2 (m) cm<sup>-1</sup>; HRMS (ESI+) for C<sub>11</sub>H<sub>17</sub>O<sub>3</sub> [M+H-H<sub>2</sub>O]: calculated: 197.1178, found: 197.1181;  $[\alpha]_D^{20} = -31.85$  ( $c = 0.43$ , CHCl<sub>3</sub>).

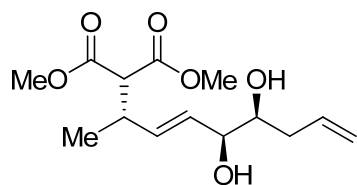

**Dimethyl 2-((2S,5S,6S,E)-5,6-dihydroxynona-3,8-dien-2-yl)malonate.** An oven-dried 2-dram vial was charged with 7.5 mg (0.0065 mmol) of tetrakis(triphenylphosphine)palladium, 0.20 mL of THF, and 12.9 mg (0.0975 mmol) of dimethylmalonate in a dry-box under an argon atmosphere. The vial was capped with septum, taped with electrical tape, and removed from the dry-box. Next, 10.0 mg

(0.0650 mmol) of (*S*)-1-((2*R*,3*S*)-3-((*E*)-prop-1-enyl)oxiran-2-yl)but-3-en-1-ol was added to the reaction vial as a solution in THF (0.14 mL). The reaction was allowed to stir at ambient temperature for 14 hours. After this time period, the reaction was cooled to 0 °C, followed by addition of about 10  $\mu$ L of H<sub>2</sub>O<sub>2</sub> (30% in water). Saturated NaHCO<sub>3</sub> and ether were added and stirring continuously for 5 minutes, and the layers were separated. The aqueous layer was extracted with ether ( $\times$ 3), and the organic layers were filtered through a plug of MgSO<sub>4</sub> (top) and silica gel (bottom). Solvent was evaporated *in vacuo*. The crude material was purified by silica gel chromatography (3:1 hexane:EtOAc) to afford 16.0 mg (86%) of the title compound (17:1 *d.r.*) as a colorless oil.  $R_f$  = 0.2 (1:1 hexane:EtOAc, stain in KMnO<sub>4</sub>). <sup>1</sup>H NMR (500 Hz, CDCl<sub>3</sub>):  $\delta$  1.11 (3H, d,  $J$  = 7.0 Hz, CHCH<sub>3</sub>),  $\delta$  2.15 (1H, dddt,  $J$  = 14.5, 7.5, 8.0, 1.0 Hz, CH<sub>a</sub>H<sub>b</sub>CH=CH<sub>2</sub>),  $\delta$  2.27-2.35 (3H, m, CH<sub>a</sub>H<sub>b</sub>CH=CH<sub>2</sub> and 2 OHs),  $\delta$  2.99 (1H, ddq,  $J$  = 8.5, 7.5, 7.0 Hz, CHCH<sub>3</sub>),  $\delta$  3.33 (1H, d,  $J$  = 8.5 Hz, C(O)CHC(O)),  $\delta$  3.51 (1H, ddd,  $J$  = 8.0, 6.0, 4.0 Hz, CHOHCHOHCH<sub>2</sub>),  $\delta$  3.70 (3H, s, (OCH<sub>3</sub>)<sub>a</sub>),  $\delta$  3.73 (3H, s, (OCH<sub>3</sub>)<sub>b</sub>),  $\delta$  3.92 (1H, dd,  $J$  = 6.5, 4.5 Hz, CHOHCHOHCH<sub>2</sub>),  $\delta$  5.12-5.17 (2H, m, CH<sub>2</sub>CH=CH<sub>2</sub>),  $\delta$  5.55 (1H, ddd,  $J$  = 15.5, 7.0, 1.0 Hz, CH=CHCHOH),  $\delta$  5.72 (1H, ddd,  $J$  = 16.0, 8.5, 1.0 Hz, CH=CHCHOH),  $\delta$  5.84 (1H, dddd,  $J$  = 17.5, 10.5, 7.5, 6.5 Hz, CH<sub>2</sub>CH=CH<sub>2</sub>); <sup>13</sup>C NMR (125 Hz, CDCl<sub>3</sub>):

$\delta$  168.78, 168.76, 135.2, 134.5, 130.8, 118.4, 75.2, 73.6, 57.6, 52.7, 52.6, 37.6, 37.0, 18.3 ppm; IR (neat): 3433.4 (br), 2955.5 (m), 1734.9 (s), 1641.3 (w), 1534.7 (m), 1243.5 (br), 1159.9 (m), 1062.7 (m), 1018.7 (m), 976.3 (m) cm<sup>-1</sup>; HRMS (ESI+) for C<sub>14</sub>H<sub>21</sub>O<sub>5</sub> [M+H-H<sub>2</sub>O]: calculated: 269.1389, found: 269.1382;  $[\alpha]_D^{20}$  = -19.86 ( $c$  = 0.88, CHCl<sub>3</sub>).

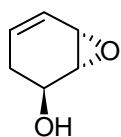

**(1*R*,2*S*,6*S*)-7-oxabicyclo[4.1.0]hept-4-en-2-ol.** A flame-dried round-bottom-flask was charged with 2.0 mg (0.0032 mmol) of Hoveyda-Grubbs II catalyst, 6.0 mL of CH<sub>2</sub>Cl<sub>2</sub>, and 10.0 mg (0.0650 mmol) of (*S*)-1-((2*R*,3*S*)-3-((*E*)-prop-1-enyl)oxiran-2-yl)but-3-en-1-ol in CH<sub>2</sub>Cl<sub>2</sub> (0.5 mL). The reaction was allowed to stir at ambient temperature under N<sub>2</sub> for 2 hours. After this time period, solvent was evaporated *in vacuo*, and the crude material was purified by silica gel chromatography (2:1 pentane:ether) to afford 5.9 mg (81%) of the title compound (17:1 *d.r.*) as a colorless oil.  $R_f$  = 0.23 (1:1 hexane:EtOAc, stain in KMnO<sub>4</sub>). <sup>1</sup>H NMR (500 Hz, CDCl<sub>3</sub>):  $\delta$  1.53 (1H, d,  $J$  = 8.5 Hz, OH),  $\delta$  2.27 (1H, ddt,  $J$  = 17.5, 6.5, 2.0 Hz, CH<sub>a</sub>H<sub>b</sub>),  $\delta$  2.37 (1H, dddd,  $J$  = 17.0, 6.0, 3.5, 3.0 Hz, CH<sub>a</sub>H<sub>b</sub>),  $\delta$  3.34 (1H, td,  $J$  = 4.0, 1.5 Hz, CHOHCHOH),  $\delta$  3.51 (1H, ddd,  $J$  = 4.0, 2.5, 2.0 Hz, CHOH),  $\delta$  4.43 (1H, m, CHOHCHOH),  $\delta$  5.82 (1H, ddm,  $J$  = 9.5, 6.0 Hz, CH<sub>2</sub>CH=CH),  $\delta$  6.06 (1H, dt, CH<sub>2</sub>CH=CH); <sup>13</sup>C NMR (125 Hz, CDCl<sub>3</sub>):  $\delta$  129.6, 124.1, 64.1, 55.9, 47.0, 30.6 ppm; IR (neat): 3412.5 (br), 3041.1 (w), 2993.0 (w), 2923.0 (s), 2852.8 (m), 1641.8 (w), 1418.5 (m), 1398.1 (m), 1050.9 (s), 1036.0 (s), 981.1 (s), 952.2 (m), 885.9 (s), 805.2 (s), 771.3 (s) cm<sup>-1</sup>; HRMS (ESI+) for C<sub>6</sub>H<sub>9</sub>O<sub>2</sub> [M+H]: calculated: 113.0603, found: 113.0597;  $[\alpha]_D^{20}$  = -79.15 ( $c$  = 0.42, CHCl<sub>3</sub>).

Spectral Data

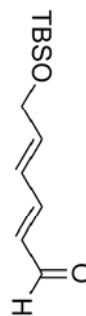

```

zhangpa*1,2*P*3--188*Morken
P2-3-188-P
exp10 sid1h
SAMPLE 9 2009 DEC. & VT 0
date apr 9 2009 dfreq 30
amt ODC13 dh 0
file exp dpr 30
ACQUISITION exp dof 0
sfrq 400.029 dm mn
tn
at 3.000 H1 dm
np 35992 dmf PROCESSING
sw 5998.8 wftt 200
td 3400 Proc ft
ds 63 tn not used
tpr 71 werr
n 2.000 wexp
h 0 wbs
tof 128 wnt
nt 56
ct 56
alock n
gain not used
FLAGS n
i1 n
in n
dp y
DISPLAY -200.0
SD 4280.3
WD 231
VS 0
WC 250
SC 0
hzmm 16.80
ts 3500.00
rftl 3902.8
rftp 2904.2
tms 1.000
nm
ph
  
```

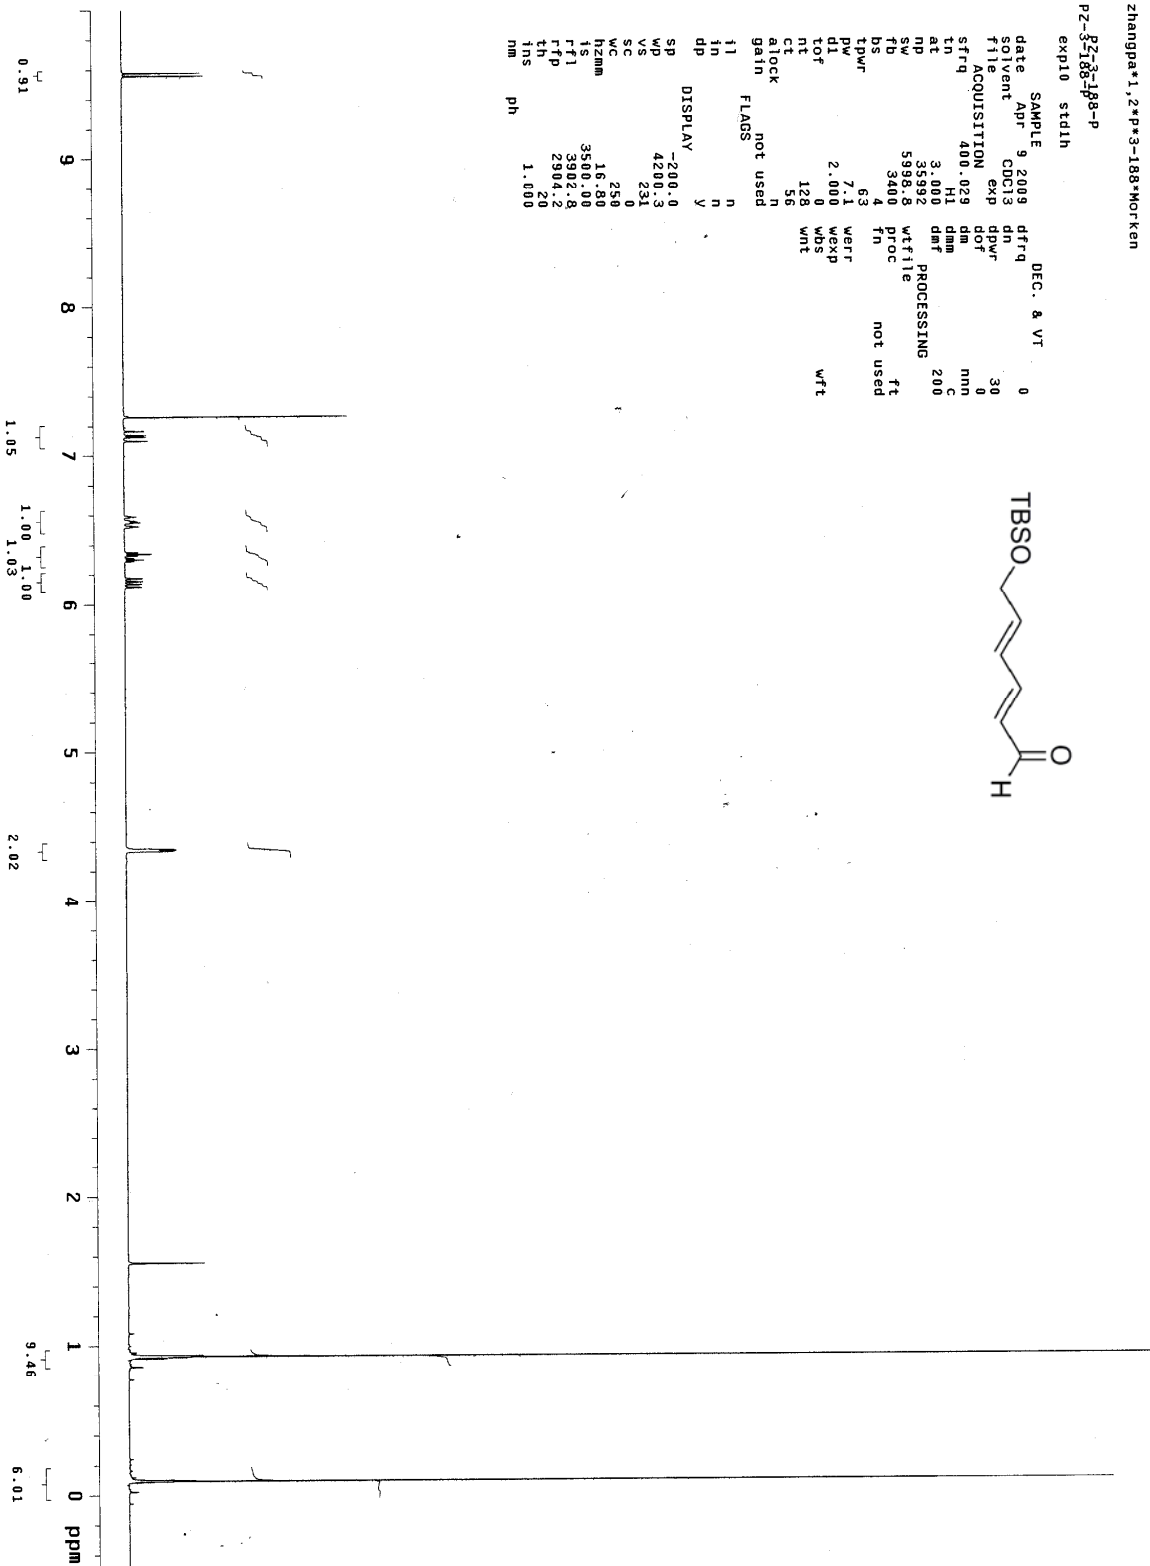

pz-3-188-C13  
 exp10 std13c

SAMPLE DEC. 8 VT  
 date Apr 9 2009 dfrq 400.029  
 solvent CDCl3 dn H1  
 file /export/home/~ dpvr 45  
 jhm/pz/pz-3-188-p~ dot 0  
 C13 dm vvy W  
 C13 C13  
 ACQUISITION  
 sfrq 100.599 dmf 9242  
 tn C13  
 at 0.640 lb PROCESSING 2.00  
 np 32876 wf file  
 sw 25683.4 proc ft  
 fd 14200 fn not used  
 bs 4  
 tdwr 55 werr  
 pw 9.0 wekp  
 dl 4.000 wds  
 tof 2271.7 wnt  
 nt 4800  
 ct 4116  
 atlock n  
 gain not used  
 FLAGS  
 fl n  
 in n  
 in n  
 cp y  
 DISPLAY -1053.6  
 sp 25683.4  
 wd 303  
 vs 0  
 sc 0  
 wc 250  
 hzmm 102.72  
 fs 500.00  
 rfi 8921.9  
 rfp 7769.3  
 tn 5  
 ins 100.000  
 na no ph

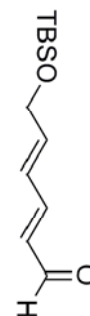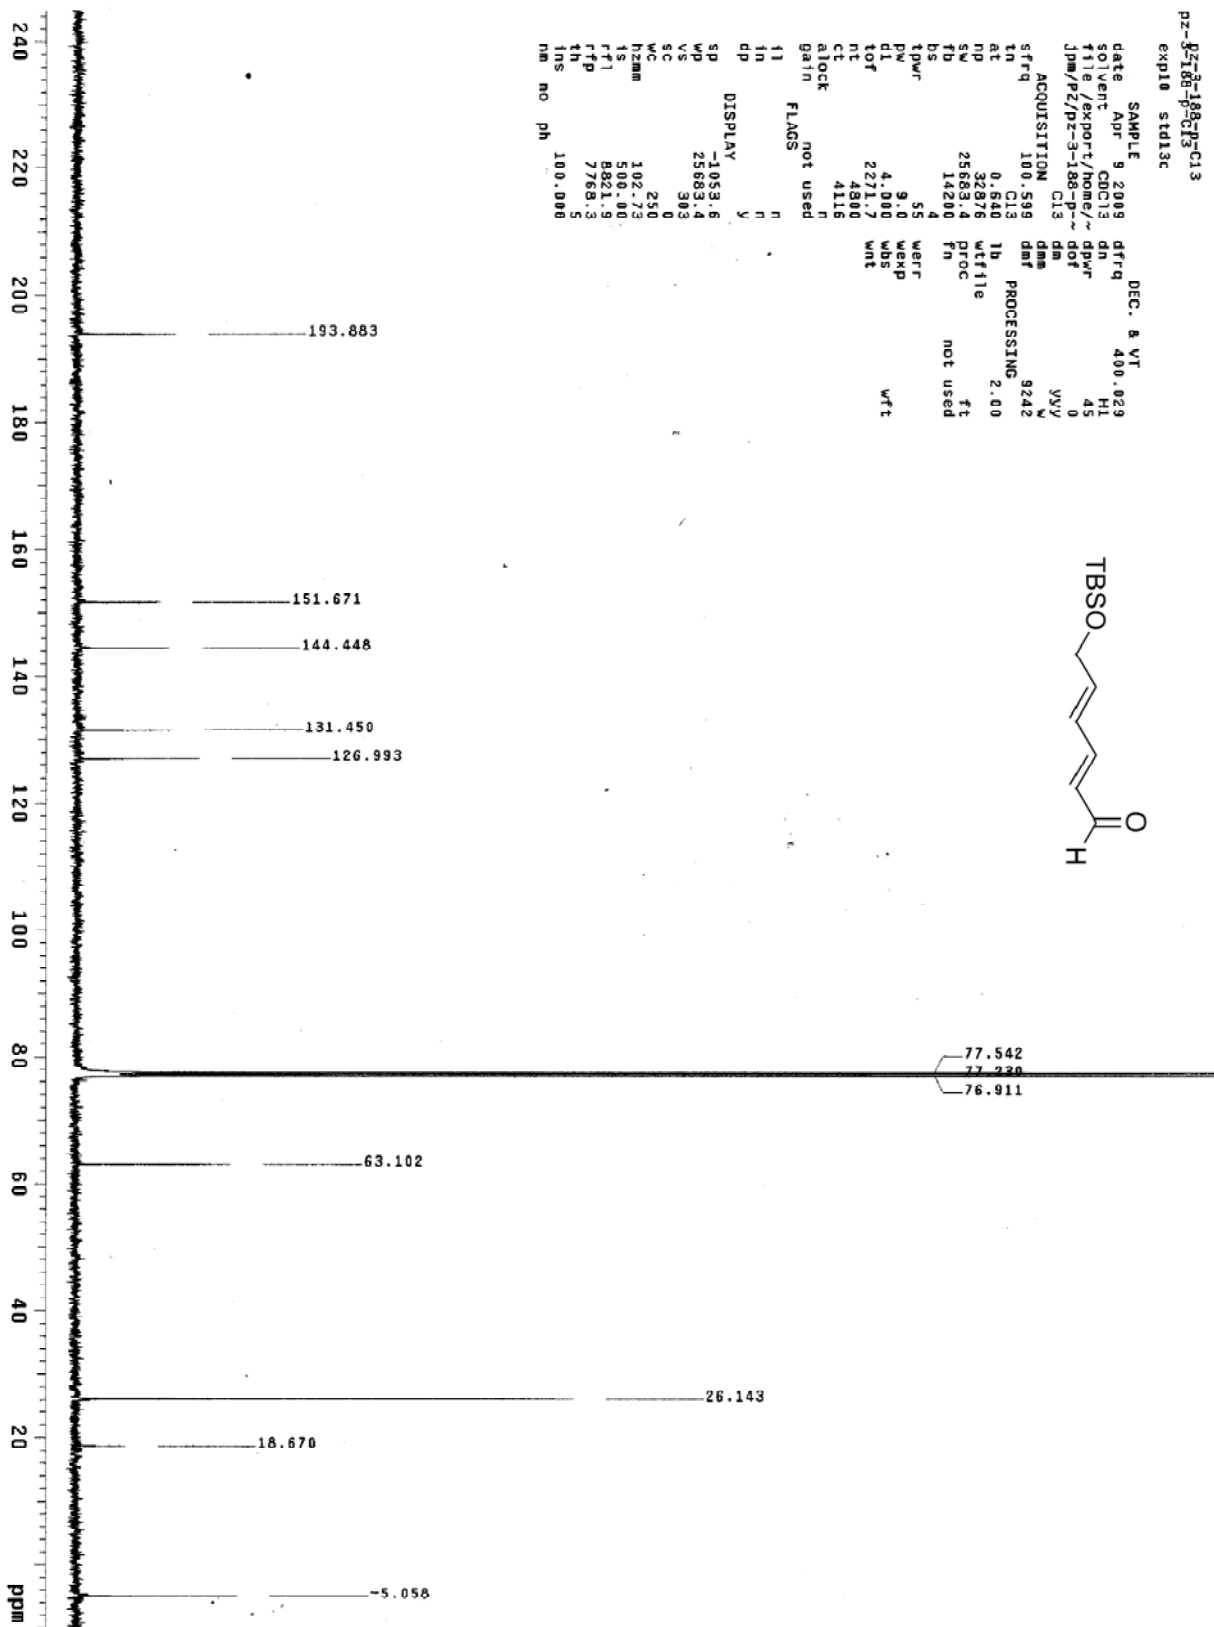

p2-33-239-p  
expl std1h

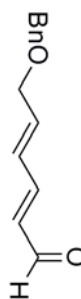

|             |             |            |          |           |   |
|-------------|-------------|------------|----------|-----------|---|
| date        | May 12 2009 | dtfrq      | 0        | DEC. & VT | 0 |
| solvent     | CDCl3       | nm         | 30       |           |   |
| file        | p2-33-239-p | dfw        | 0        |           |   |
| PROCUREMENT |             | dm         | nmn      |           |   |
| ACQUISITION |             | dm         | c        |           |   |
| dtfrq       | 400.029     | dm         | 200      |           |   |
| tn          |             | dmf        |          |           |   |
| at          | 3.000       | PROCESsing |          |           |   |
| np          | 35992       | wtfile     | ft       |           |   |
| sv          | 5998.8      | proc       | not used |           |   |
| fb          | 3400        | fn         |          |           |   |
| bs          |             |            |          |           |   |
| tpwr        | 63          | werr       | 7.1      |           |   |
| pw          |             | wexp       | 2.000    |           |   |
| d1          |             | wbs        |          |           |   |
| tof         |             | wrt        |          |           |   |
| nt          | 32          |            |          |           |   |
| ct          | 28          |            |          |           |   |
| block       |             |            |          |           |   |
| gain        | not used    |            |          |           |   |
| ll          | FLAGS       |            |          |           |   |
| in          | n           |            |          |           |   |
| dp          | y           |            |          |           |   |
| DISPLAY     |             |            |          |           |   |
| sp          | -0.1        |            |          |           |   |
| wp          | 4000.2      |            |          |           |   |
| vs          | 76          |            |          |           |   |
| sc          | 0           |            |          |           |   |
| wc          | 250         |            |          |           |   |
| hzmm        | 18.00       |            |          |           |   |
| is          | 3840.86     |            |          |           |   |
| ft1         | 3803.7      |            |          |           |   |
| ft2         | 2904.7      |            |          |           |   |
| ft3         | 2904.7      |            |          |           |   |
| ins         | 2           |            |          |           |   |
| na          | 1.000       |            |          |           |   |
| ph          |             |            |          |           |   |

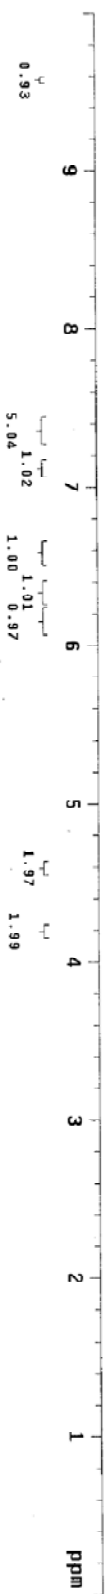

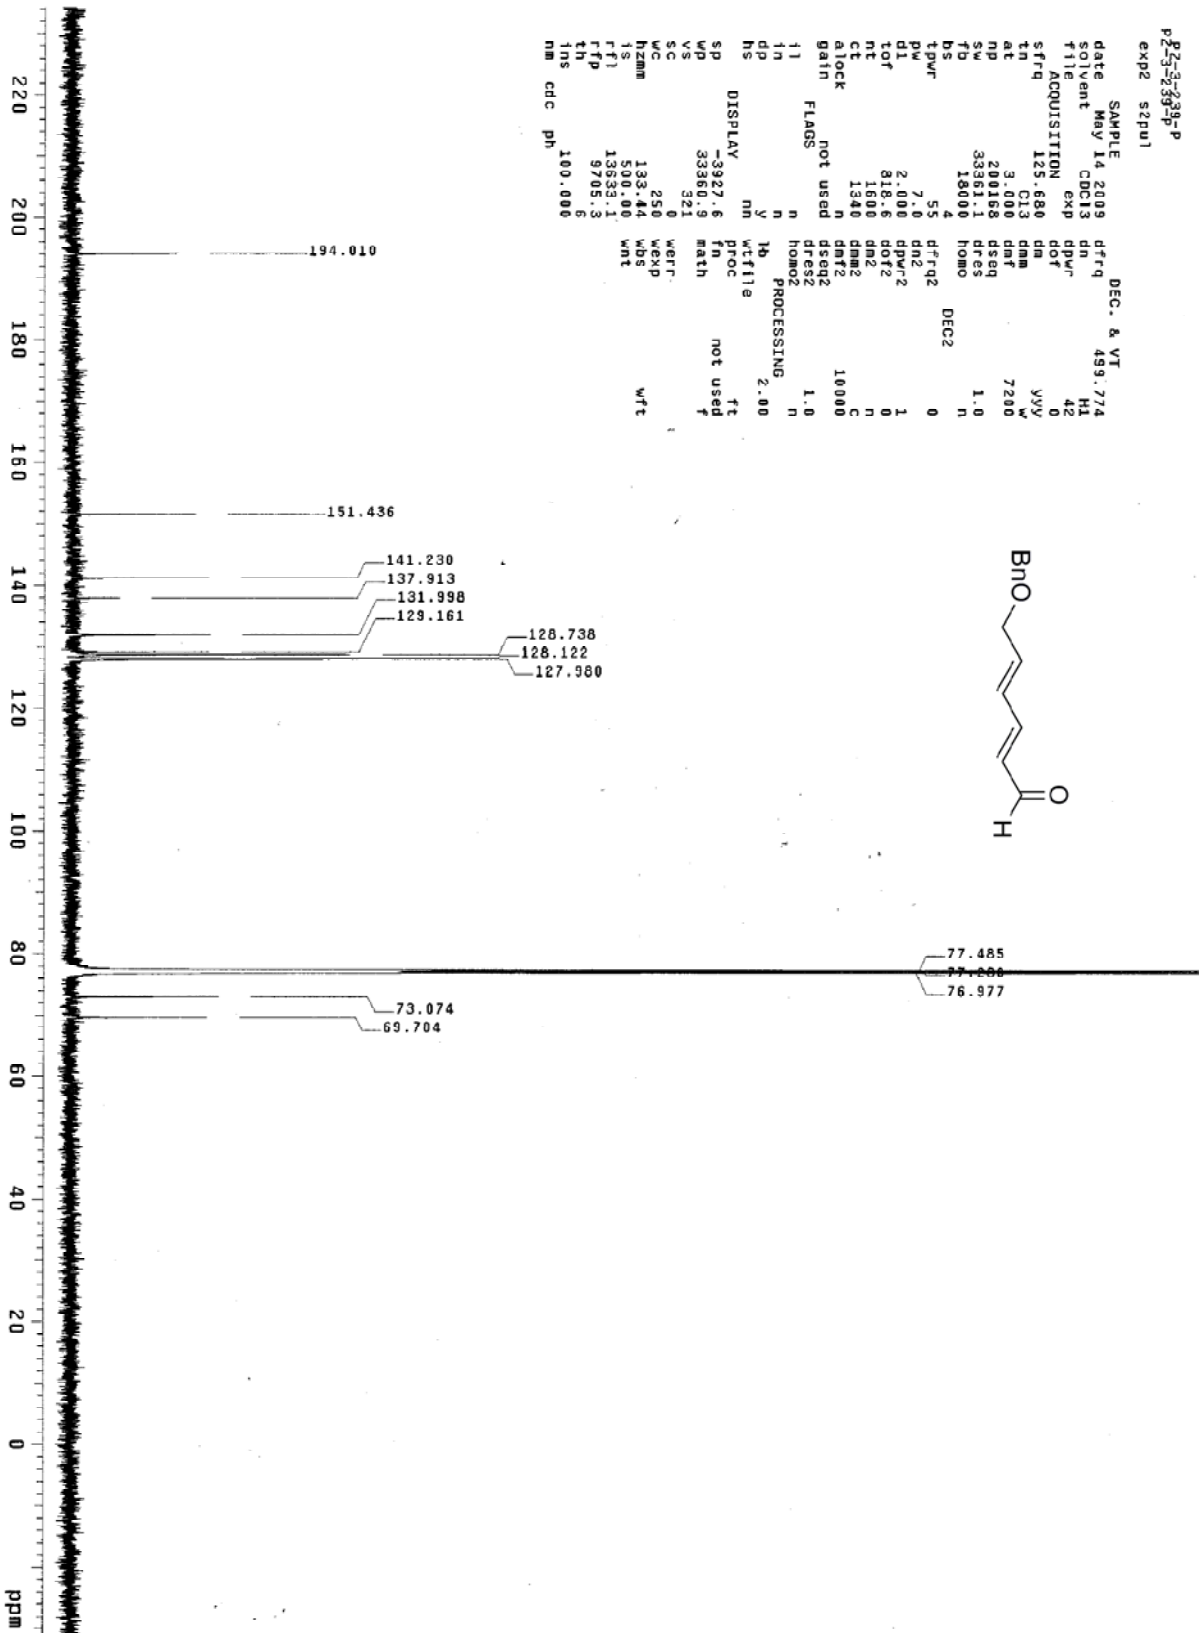

PZ-3-239-P  
 exp2 s2pu1  
 SAMPLE May 14 2009 DEC. & VI  
 date May 14 2009 dfrq 459.774  
 solvent CDCl3 dn H1  
 file exp dpvr 42  
 ACQUISITION 0  
 sfrq 125.680 dm yvv  
 tn C13 dnm W  
 at 3.000 dat 7200  
 np 200168 dseq  
 sw 33391.1 dres 1.0  
 sb 18000 homo n  
 hb  
 dpvr 55 dfrq2 DEC2 0  
 dl 2.000 dnu r2  
 tof 818.6 dof2 1  
 nt 1600 dm2 n  
 ct 1340 dm2 C  
 alock n dat2 10000  
 gain not used dres2 1.0  
 flags not used homoz n  
 11 n PROCESSING 2.00  
 1n y  
 dp n  
 hs nm wftfile  
 DISPLAY -3927.6 fn ft  
 sp 33360.9 math not used f  
 vs 321  
 sc 0 werr  
 wc 250 weyp  
 hzmm 133.44 wds  
 is 300.00 wnt  
 f1 1392.1  
 fh 9705.3  
 tns 100.000  
 nm cdc ph





P2-3261-2A1-F-C13  
 exp4 std13c

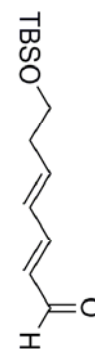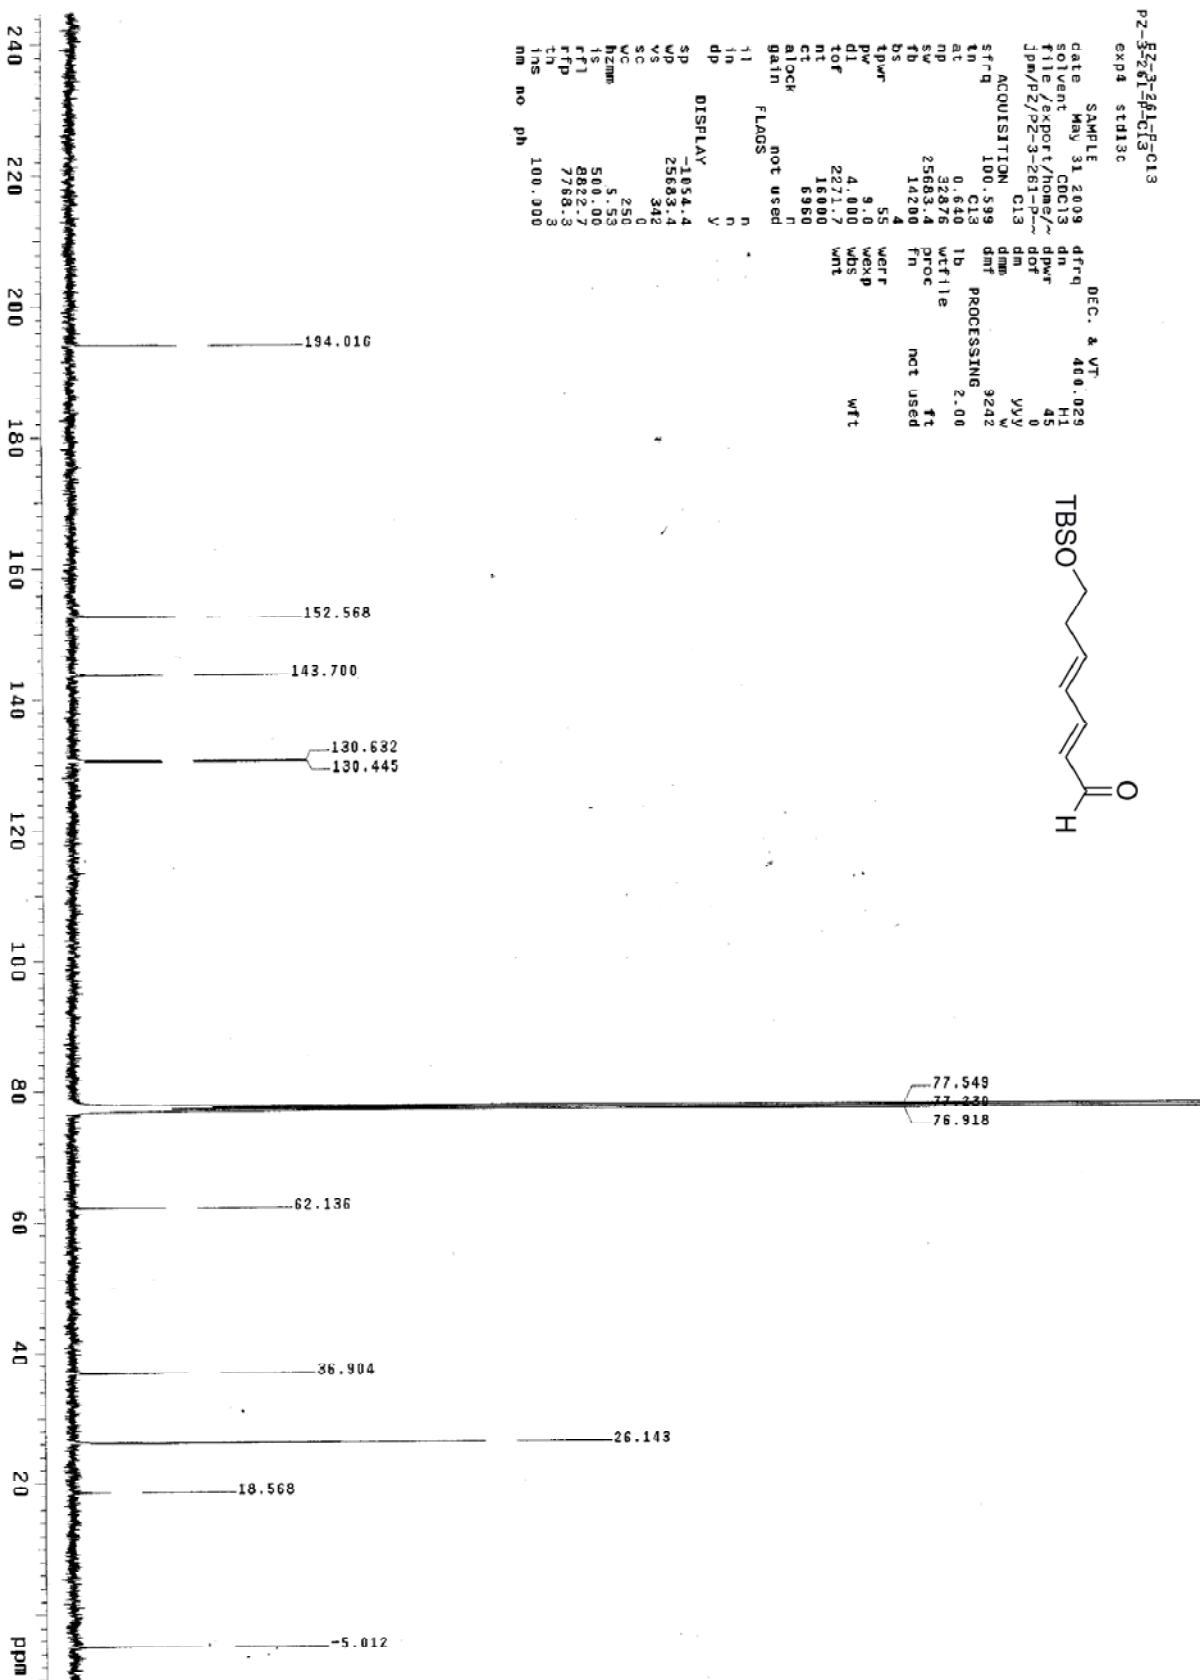

SAMPLE May 31 2009 DEC. & VT 400.029  
 solvent CDCl3 H1 45  
 file /export/home/~dpw Jpm/H2/P2-3-261-P-... 0  
 Jpm/H2/P2-3-261-P-... 0  
 ACQUISITION C13 dm yyy  
 sfrq 100.599 dmh 3242  
 an 0.640 lb PROCESSING 2.00  
 no 32876 wfile ft  
 sv 25683.4 proc not used  
 fb 14200 fn  
 bs 4  
 tpwr 55 werr  
 pw 9.0 wexp  
 dl 4.000 wds wft  
 tof 2271.7 wnt  
 nt 16000  
 ct 6960  
 alock not used  
 gain not used  
 flags  
 i1 n  
 in n  
 dp y  
 DISPLAY -1854.4  
 sp 25683.4  
 vs 342  
 zc 0  
 z 250  
 hzmm 5.53  
 is 500.00  
 rftl 8822.7  
 rfp 7768.3  
 th 3  
 ins 100.000  
 nm no ph

zhangpa\*1, 2\*p\*3-178\*Morken

P2-3176-3P

exps std1h

```

SAMPLE      DEC. 8 VT  0
date  Mar 31 2003  dfrq
solvent  CHCl3  cn
file      exp  ddpr  30
ACQUISITION  dot  0
sfrq  400.029  dm  nnn
tn  H1  dnm  c
at  3.000  dmf  200
np  35992  wtfile  PROCESSING
sw  5998.8  wfile  ft
fb  3400  proc  not used
bs  4  tn
tpwr  63
pw  7.1  werr
dl  2.009  wexp
tof  9  wds
nc  32  wnt
cl  32
atlock  n
gatin  not used
||  n
in  n
dp  y
DISPLAY  -0.1
SP  4000.2
VS  210
WC  0
hzmnm  16.00
IS  6037.35
Ff1  3902.8
FfP  2904.2
tn  1.000
nm  1.000
    
```

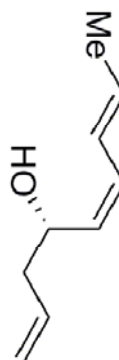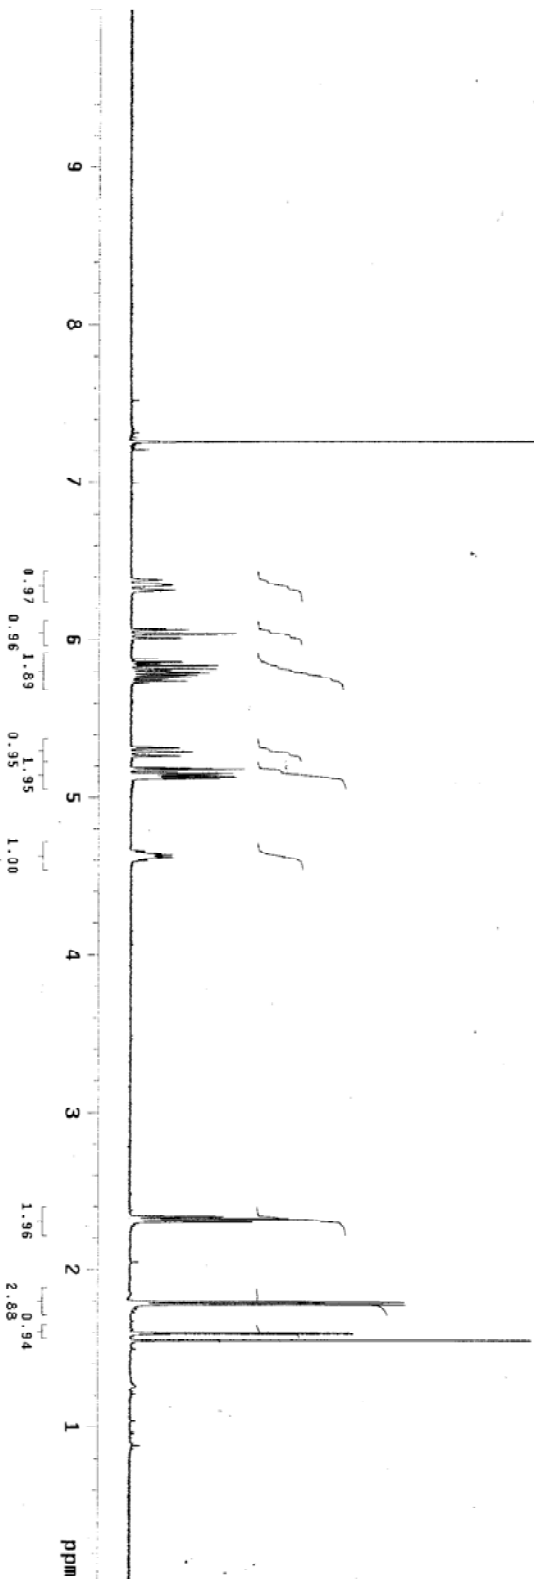

zhangjda\*1.2\*pp\*3-147\*NO-Morken  
 P2-3-147-pp-C13  
 exp1 std13c

SAMPLE DEC: A VI  
 date Apr 3 2009 df-rq 400.029  
 solvent CCl3 dn H1  
 file exp dpvr 45  
 ACQUISITION dof 0  
 sfrq 100.509 vvy  
 tn 0.143 dm  
 nt 32876 dm PROCESSING 9242  
 su 25683.4 wf11e  
 fb 14200 proc  
 bs 4 fn not used  
 tpwr 55  
 pv 9.0 wfrt  
 di 4.000 wexp  
 lof 2271.7 wds  
 nt 1600 wnt  
 ct 220  
 alock n  
 gain not used  
 FLABS  
 l1 n  
 l2 n  
 l3 n  
 l4 n  
 l5 n  
 l6 n  
 l7 n  
 l8 n  
 l9 n  
 l10 n  
 l11 n  
 l12 n  
 l13 n  
 l14 n  
 l15 n  
 l16 n  
 l17 n  
 l18 n  
 l19 n  
 l20 n  
 l21 n  
 l22 n  
 l23 n  
 l24 n  
 l25 n  
 l26 n  
 l27 n  
 l28 n  
 l29 n  
 l30 n  
 l31 n  
 l32 n  
 l33 n  
 l34 n  
 l35 n  
 l36 n  
 l37 n  
 l38 n  
 l39 n  
 l40 n  
 l41 n  
 l42 n  
 l43 n  
 l44 n  
 l45 n  
 l46 n  
 l47 n  
 l48 n  
 l49 n  
 l50 n  
 l51 n  
 l52 n  
 l53 n  
 l54 n  
 l55 n  
 l56 n  
 l57 n  
 l58 n  
 l59 n  
 l60 n  
 l61 n  
 l62 n  
 l63 n  
 l64 n  
 l65 n  
 l66 n  
 l67 n  
 l68 n  
 l69 n  
 l70 n  
 l71 n  
 l72 n  
 l73 n  
 l74 n  
 l75 n  
 l76 n  
 l77 n  
 l78 n  
 l79 n  
 l80 n  
 l81 n  
 l82 n  
 l83 n  
 l84 n  
 l85 n  
 l86 n  
 l87 n  
 l88 n  
 l89 n  
 l90 n  
 l91 n  
 l92 n  
 l93 n  
 l94 n  
 l95 n  
 l96 n  
 l97 n  
 l98 n  
 l99 n  
 l100 n  
 no ph 100.080

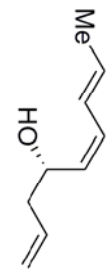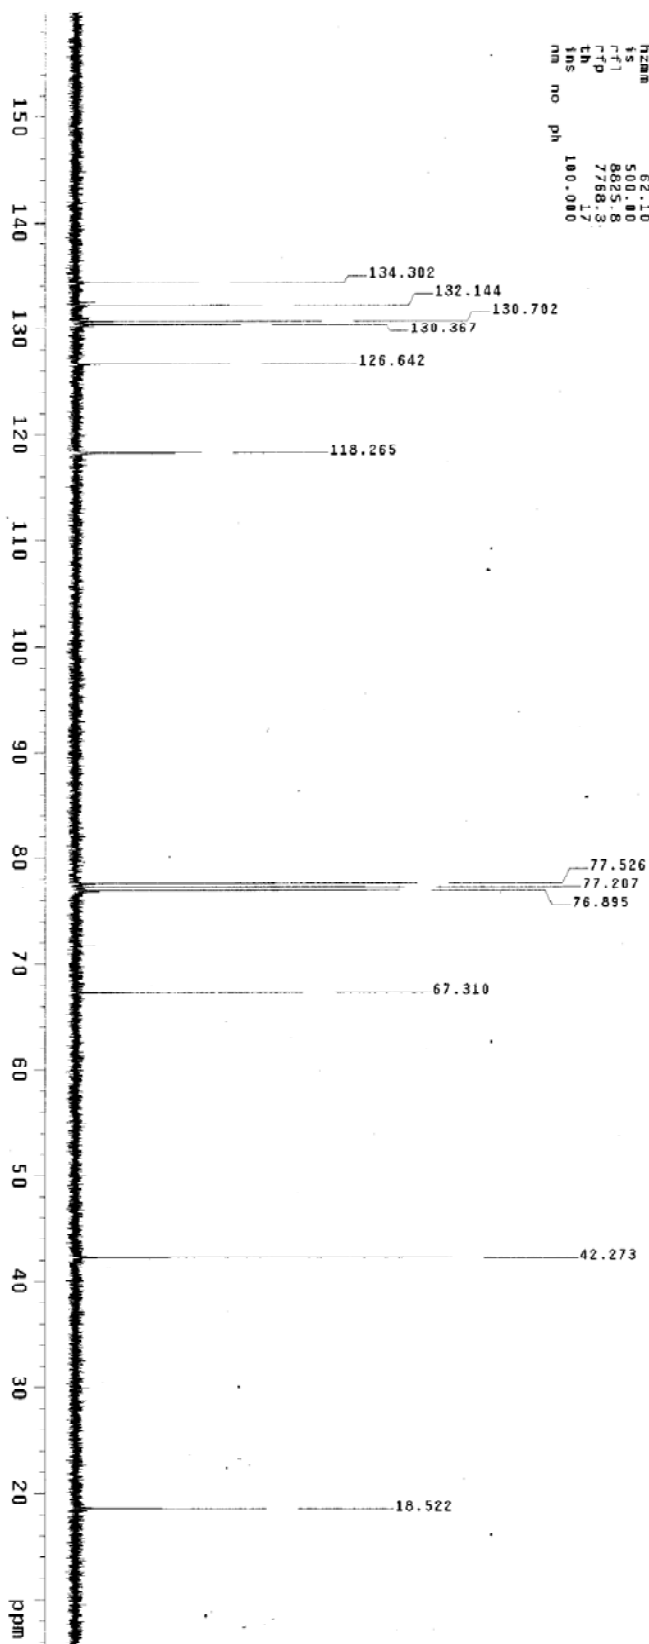



zhangjupr-1,6-f-4a-c-3-140-nmr.km

02-23-18-21

expb std13c

```

SAMPLE DEC. 8 VT
date Feb 21 2009 dfrq 400.029
cont CDCl3 d1 45
f1s 45 d1 45
f1s ACQUISITION exp dmf yyy
sfrq 100.599 dm
in C13 dmf 9242
at 0.540 dm
np 32876 PROCESSED 2.00
sw 25683.4 lbfile
fb 14200 wfile
ds 4 proc
tpwr 55 fn
pw 9.0 weff
dl 4.000 weff
tof 2271.7 wexp
nt 1600 wds
ct 72 wft
alock not used
gain n
flags not used
11 n
in n
dp y
DISPLAY -1056.7
sp 25683.4
wp 44
vs 0
sc 250
wc hzmm 24.84
ls 500.00
ftl 8925.9
ftp 7789.3
tms 16
nm no 100.000
    
```

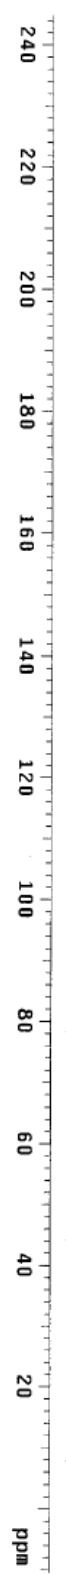

- 137.824
- 134.341
- 130.858
- 130.523
- 125.177
- 118.265
- 77.542
- 77.230
- 76.911
- 67.318
- 42.273
- 38.047
- 31.660
- 29.096
- 22.753
- 14.275

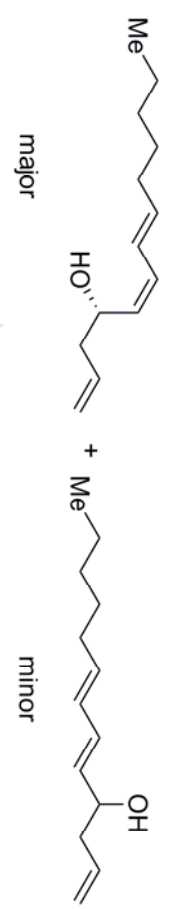

p2-82-3-157-9  
expi stahh

| SAMPLE      |                | DEC. & VT  |          |
|-------------|----------------|------------|----------|
| date        | Mar 18 2009    | dfrq       | 0        |
| solvent     | CDCl3          | dn         | 30       |
| file        | /export/home/~ | dpwr       | 0        |
| jpw         | p2-8-157-9     | dot        | 0        |
| ACQUISITION |                | dm         | nnn      |
| strq        | 460.025        | dmp        | c        |
| tn          | HI             | dnt        | 200      |
| at          | 3.001          | PROCESSING |          |
| np          | 38982          | wfitle     | ft       |
| sw          | 5898.8         | proc       | not used |
| fb          | 3401           | fn         |          |
| bs          | 4              | weir       |          |
| tpwr        | 7.1            | wexp       |          |
| pl          | 2.000          | wbs        | wft      |
| lrf         | 1              | wnt        |          |
| nr          | 32             |            |          |
| ct          | 24             |            |          |
| clock       | n              |            |          |
| gath        | n              |            |          |
| flags       |                |            |          |
| rl          | n              |            |          |
| in          | n              |            |          |
| dp          | y              |            |          |
| sp          | DISPLAY        |            |          |
| wp          | -0.1           |            |          |
| wv          | 4000.7         |            |          |
| wc          | 57             |            |          |
| sc          | 0              |            |          |
| uc          | 250            |            |          |
| hzmm        | 16.00          |            |          |
| ts          | 1456.21        |            |          |
| rfl         | 1801.1         |            |          |
| rtp         | 0              |            |          |
| th          | 9              |            |          |
| ins         | 1.000          |            |          |
| nm          |                |            |          |

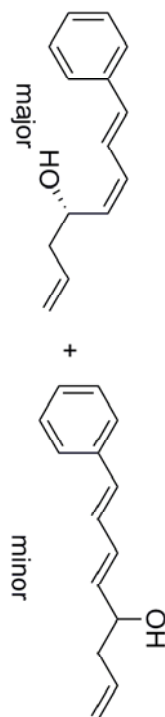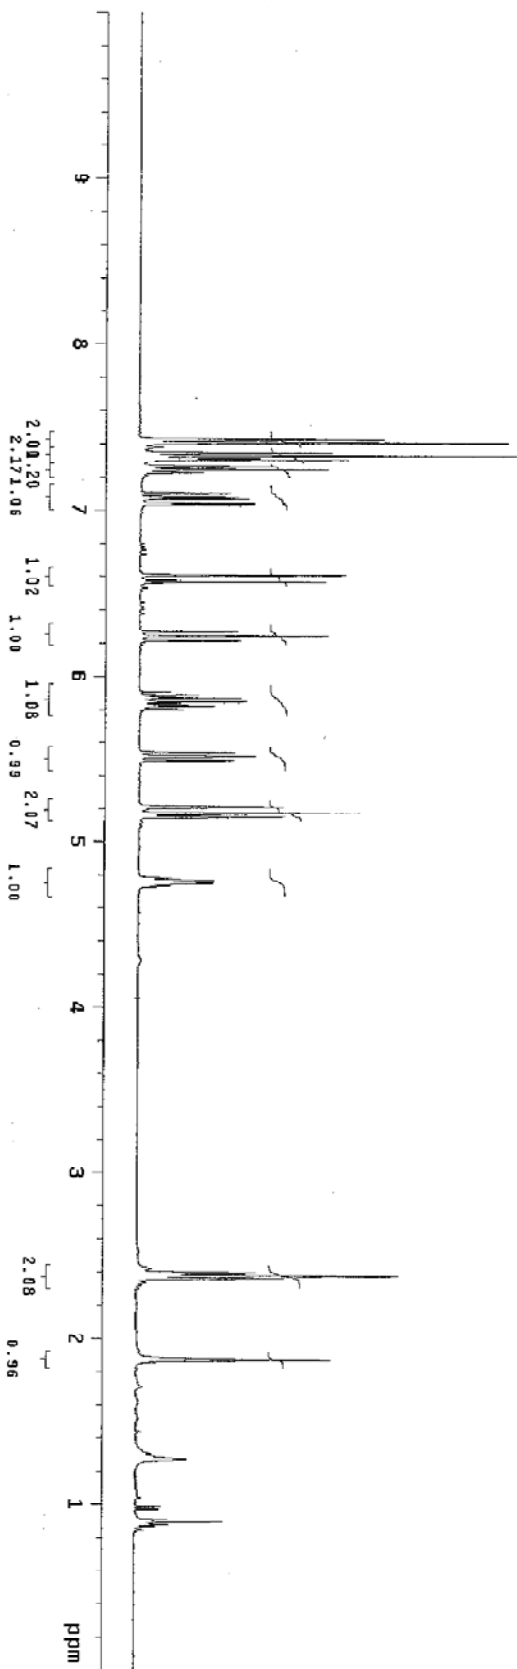

p2-RZ-3-157-P-C13  
 exp2 std13c

|         |             |          |            |         |
|---------|-------------|----------|------------|---------|
| date    | Mar 16 2009 | dfreq    | DEC. & VT  | 400.029 |
| solvent | CDCl3       | dn       |            | H1      |
| file    | exp         | dpwr     |            | 45      |
| title   | exp         | dot      |            | 0       |
| sfreq   | 100.593     | dm       |            | VVY     |
| z1      | 0.543       | dmf      |            | 9242    |
| nd      | 32876       | lb       | PROCESSING | 2.00    |
| sw      | 25683.4     | wtfile   |            |         |
| fb      | 14200       | proc     |            |         |
| bs      | 4           | fn       |            |         |
| tpwr    | 55          | ft       |            |         |
| pw      | 9.0         | not used |            |         |
| dl      | 4.000       | werr     |            |         |
| tof     | 2271.7      | wexp     |            |         |
| nt      | 1500        | wbs      |            |         |
| ct      | 60          | wnt      |            |         |
| atlock  | not used    |          |            |         |
| gain    | not used    |          |            |         |
| flags   |             |          |            |         |
| i1      | n           |          |            |         |
| in      | n           |          |            |         |
| dp      | y           |          |            |         |
| display |             |          |            |         |
| sp      | 1062.2      |          |            |         |
| wp      | 23983.4     |          |            |         |
| v       | 94          |          |            |         |
| sc      | 0           |          |            |         |
| wc      | 250         |          |            |         |
| hzmm    | 102.73      |          |            |         |
| is      | 500.00      |          |            |         |
| rfl     | 8830.5      |          |            |         |
| rffp    | 7768.3      |          |            |         |
| th      | 13          |          |            |         |
| ims     | 100.000     |          |            |         |
| nm      |             |          |            |         |

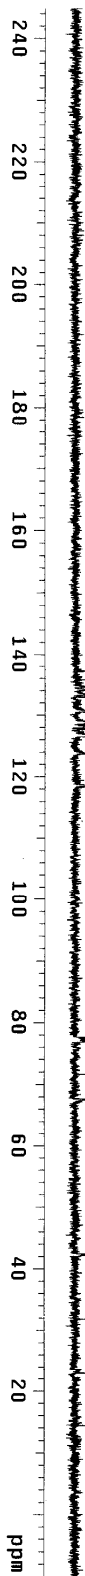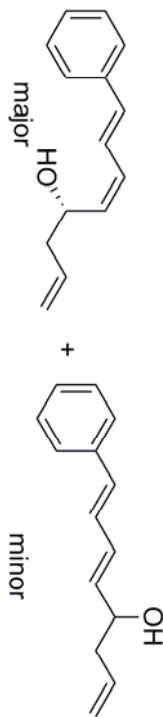

137.146  
 134.606  
 134.099  
 133.305  
 130.593  
 128.769  
 128.014  
 126.712  
 123.767  
 118.522  
 77.542  
 77.222  
 76.911  
 67.489  
 42.304



```

#2527345pp
exp# szpol
SAMPLE 2009 JUN 11 499.774 DEC. & VT
SOLVENT C6Cl6 30 M1
FILE ACQUISITION EXP 30 M1
EXP# 499.773 0
SFRQ 499.773 0
LN HI 200
AT 5.089 200
NP 7803.3 1.0
SW 4088 0
TD 4088 0
DS 4088 0
TPWR 4.5 SFRQ2 DEQ2 0
PW 4.5 SFRQ2 0
DI 9 DWR2 2
TOT 497.0 DOT2 2
NI 32 SFR2 2
CI 32 SFR2 2
ALOCK N SFR2 200
gain not used N SFR2 200
FLAGS not used N SFR2 200
11 N NOMOS PROCESSING 1.0
IN N WIT1 1.0
DP Y Proc not used Y
HS N N N N
SP DISPLAY N N N N
WD 499.78 -0.1 math
VS 104 wcrp
SC 0 wcrp
HZMM 19.99 WDS
IS 483.67 WTE
FT1 4148.17
FTP 3828.17
TH 1.000
INS 1.000
    
```

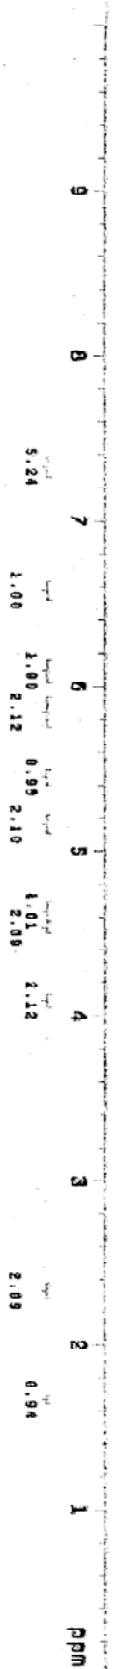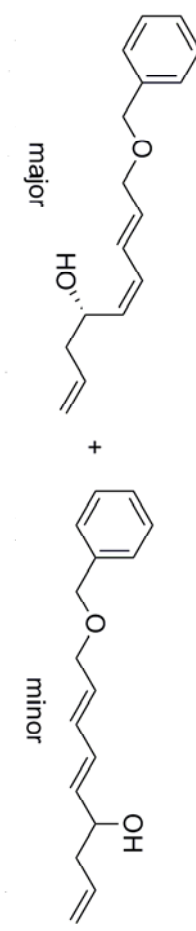

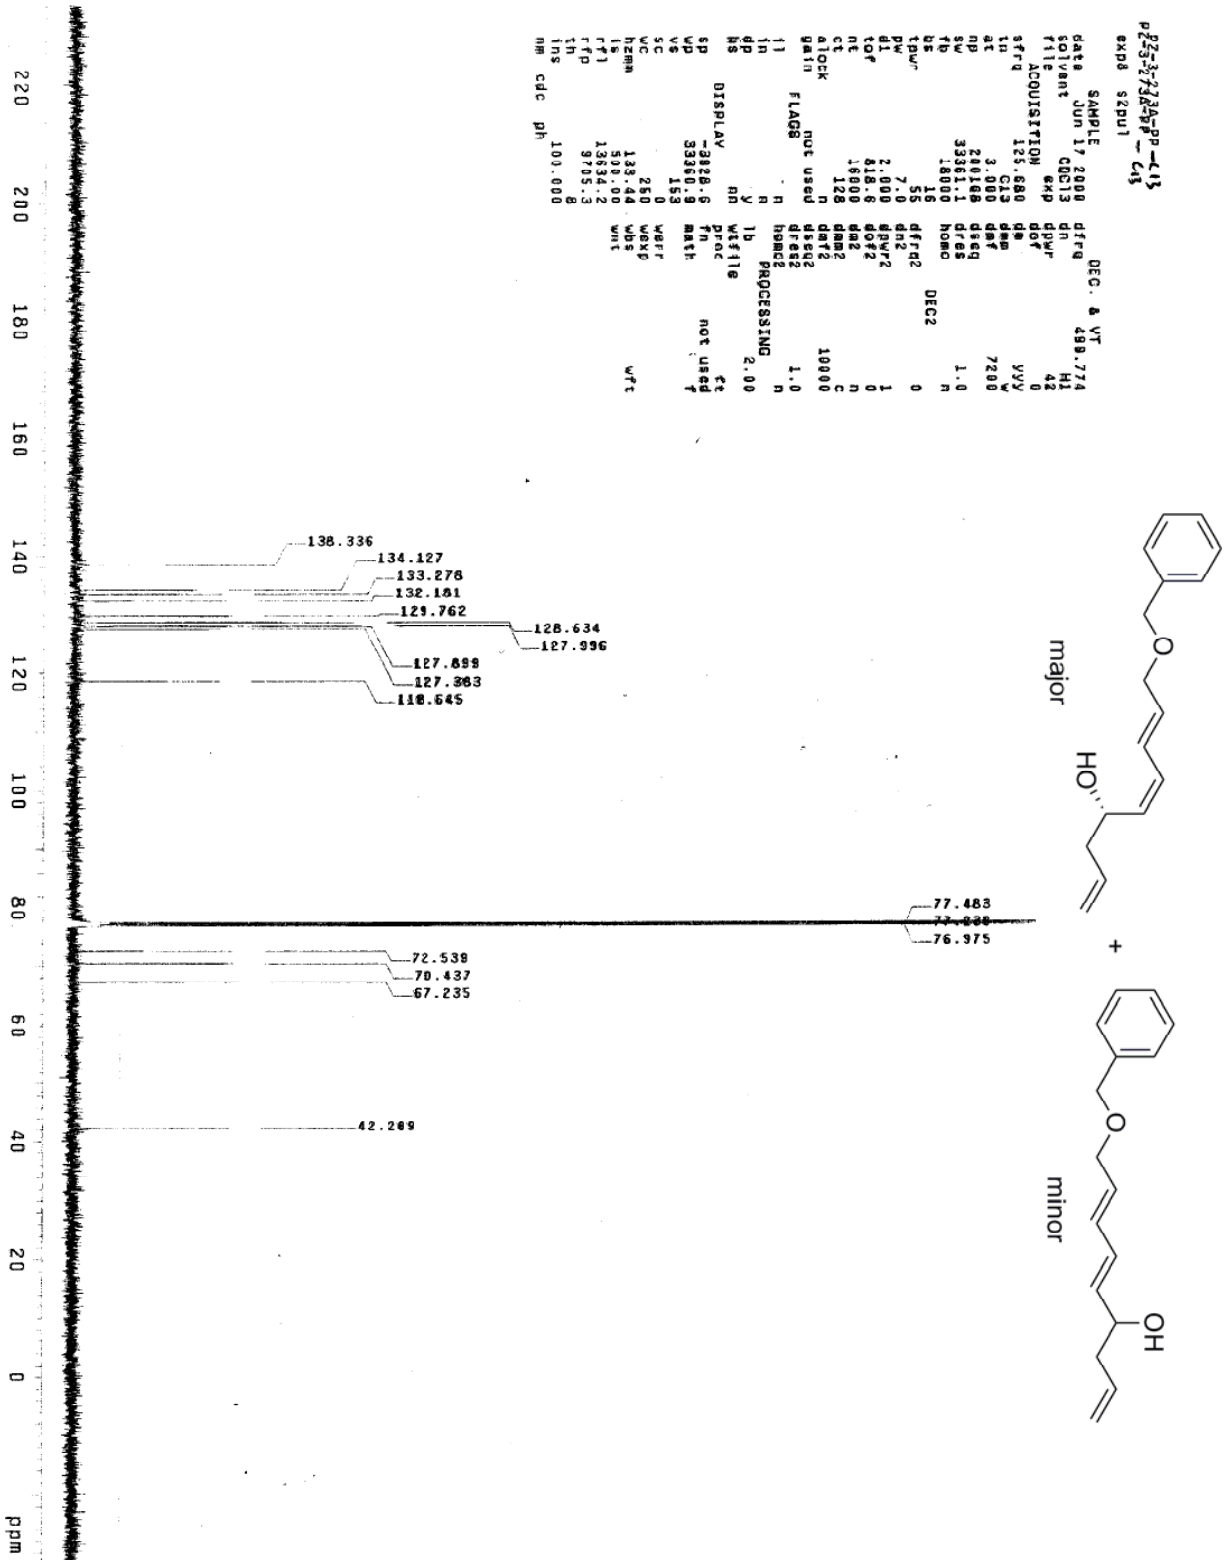

P2-32189-189-P  
 exp10 st11h

|             |          |        |           |     |
|-------------|----------|--------|-----------|-----|
| date        | SAMPLE   | 8 2003 | DEC. 8 VI | 0   |
| solvent     | CCC13    |        |           |     |
| file        | exp      |        |           | 30  |
| ACQUISITION | exp      |        |           | 0   |
| stfrq       | 400.029  |        |           | nnn |
| tn          | H1       | dmf    |           | c   |
| at          | 3.000    | dmf    |           | 200 |
| mp          | 3599.2   | wtfile | PROC      | ft  |
| sw          | 5998.8   | proc   | not used  |     |
| fb          | 3400     | fn     |           |     |
| bs          |          |        |           |     |
| tpwr        | 63       | werr   | 7.1       | wft |
| dl          | 2.000    | wexp   | 0         |     |
| tof         | 0        | wbs    | 32        |     |
| nt          | 32       | unt    |           |     |
| ct          | 32       |        |           |     |
| atlock      | n        |        |           |     |
| gain        | not used |        |           |     |
| FLAGS       | not used |        |           |     |
| l1          | n        |        |           |     |
| l2          | n        |        |           |     |
| l3          | n        |        |           |     |
| dp          | y        |        |           |     |
| DISPLAY     | -200.0   |        |           |     |
| SP          | 4200.3   |        |           |     |
| VP          | 131      |        |           |     |
| VS          | 0        |        |           |     |
| WC          | 250      |        |           |     |
| SC          | 0        |        |           |     |
| hzmm        | 16.90    |        |           |     |
| ts          | 320.13   |        |           |     |
| ts1         | 3072.8   |        |           |     |
| tfp         | 2904.2   |        |           |     |
| th          | 42       |        |           |     |
| tns         | 1.000    |        |           |     |
| nm          |          |        |           |     |
| ph          |          |        |           |     |

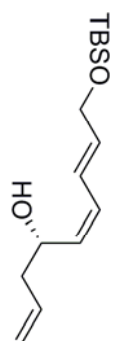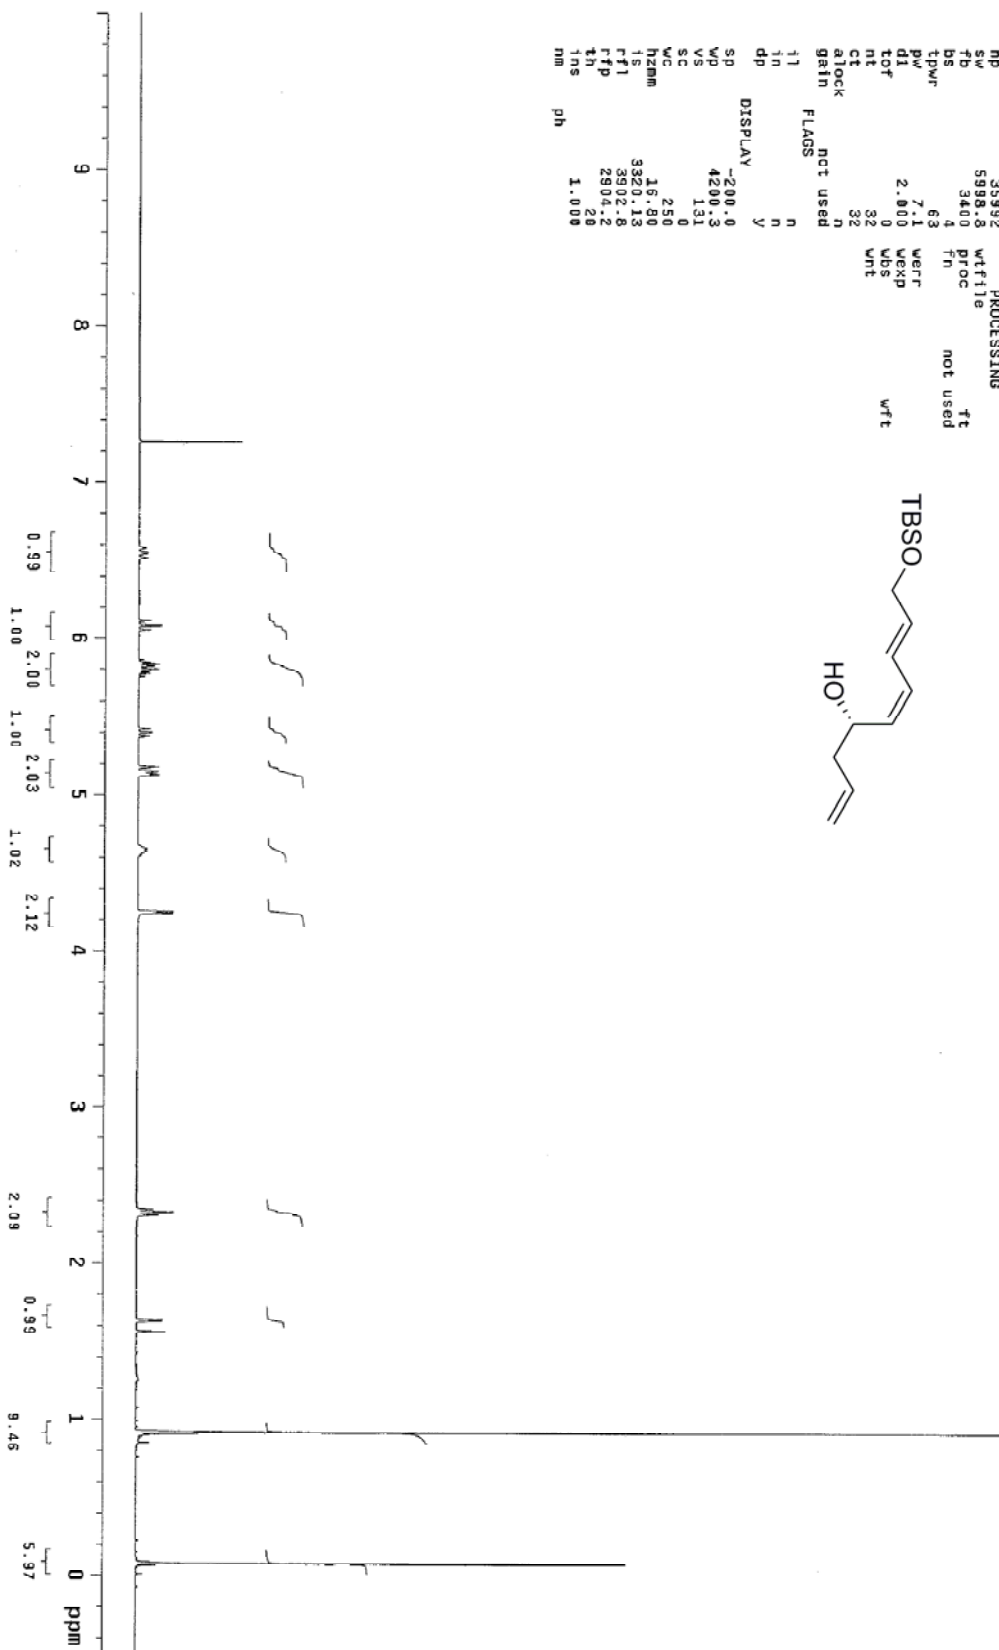

zhangpa\*1,2\*P-Cl3\*3-139\*Morken

PZ-3278-199-Cl3  
 expid st013c

```

SAMPLE      date Apr  8 2009   dfrq 400.029   DEC. & VT
solvent     dm             d0
file        exp dot    ddr      H1
ACQUISITION 100.599   dm       45
sfreq       C13      dm       0
tn          C13      dm       0
at          0.640   dm       0
np          32876   wt11le  9242
sw          25683.4 wt11le  9242
td          14200   Proc     not used
bs          4       fn
tpwr       55
pw         3.0     warrt
pr         4.007   wexp
tof        227.60  wms
nr         4450   wnt
ct         1216
atlock     not used
gain       not used
flags      not used
il         n
in         n
dp         y
DISPLAY   y
sp         -1053.6
wp         25683.4
vs         330
sc         0
wc         250
ncmm       6.75
f1         802.00
f2         802.00
ffp        7764.33
th         1.0
ins        100.000
nm no ph
    
```

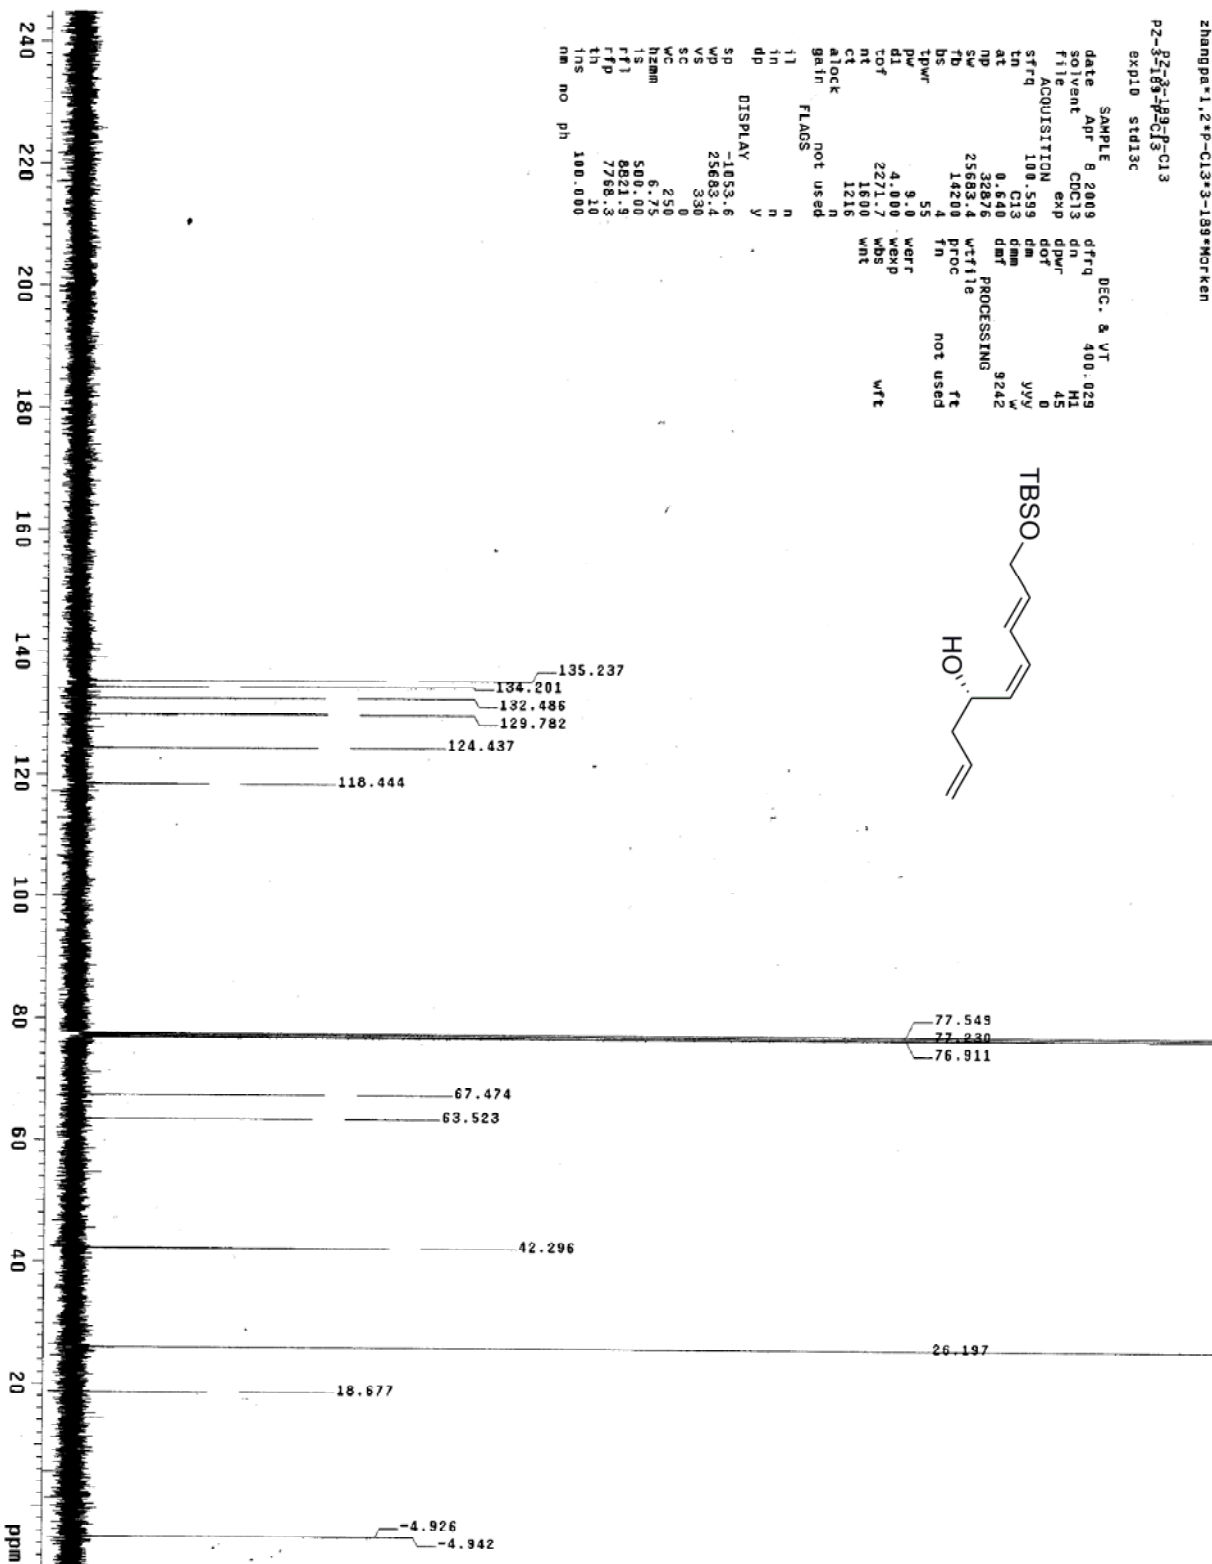

ZHANG001.L.F3-2007.MORKEN

PZ-3286-20-B  
ex01 stdh

|         |             |          |           |
|---------|-------------|----------|-----------|
| date    | JUN 17 2009 | time     | 17:00     |
| solvent | CDCl3       | temp     | 30        |
| site    | ACQUISITION | exp      | 0         |
| sfreq   | 400.029     | qpc      | 0         |
| in      | H1          | qmr      | 0         |
| az      | 3.000       | psf      | 200       |
| rd      | 35002       | proc     | PROCESSED |
| sw      | 5298.0      | wtfile   | ft        |
| fd      | 3400        | proc     | not used  |
| ds      | 4           | ft       |           |
| tdwp    | 65          | not used |           |
| dv      | 7.1         | wexp     |           |
| va      | 2.000       | wdp      |           |
| vcf     | 32          | wt       |           |
| ncf     | 28          |          |           |
| ct      | 28          |          |           |
| stock   | not used    |          |           |
| gain    | not used    |          |           |
| fl      | n           |          |           |
| in      | n           |          |           |
| dd      | y           |          |           |
| display | y           |          |           |
| sp      | -200.0      |          |           |
| wp      | 4200.3      |          |           |
| vs      | 180         |          |           |
| sc      | 250         |          |           |
| wc      | 250         |          |           |
| hsmr    | 16.00       |          |           |
| rs      | 3154.78     |          |           |
| ft1     | 999.6       |          |           |
| ft2     | 20          |          |           |
| ft3     | 20          |          |           |
| ft4     | 20          |          |           |
| ft5     | 20          |          |           |
| mm      | 1.080       |          |           |

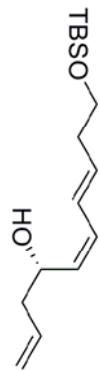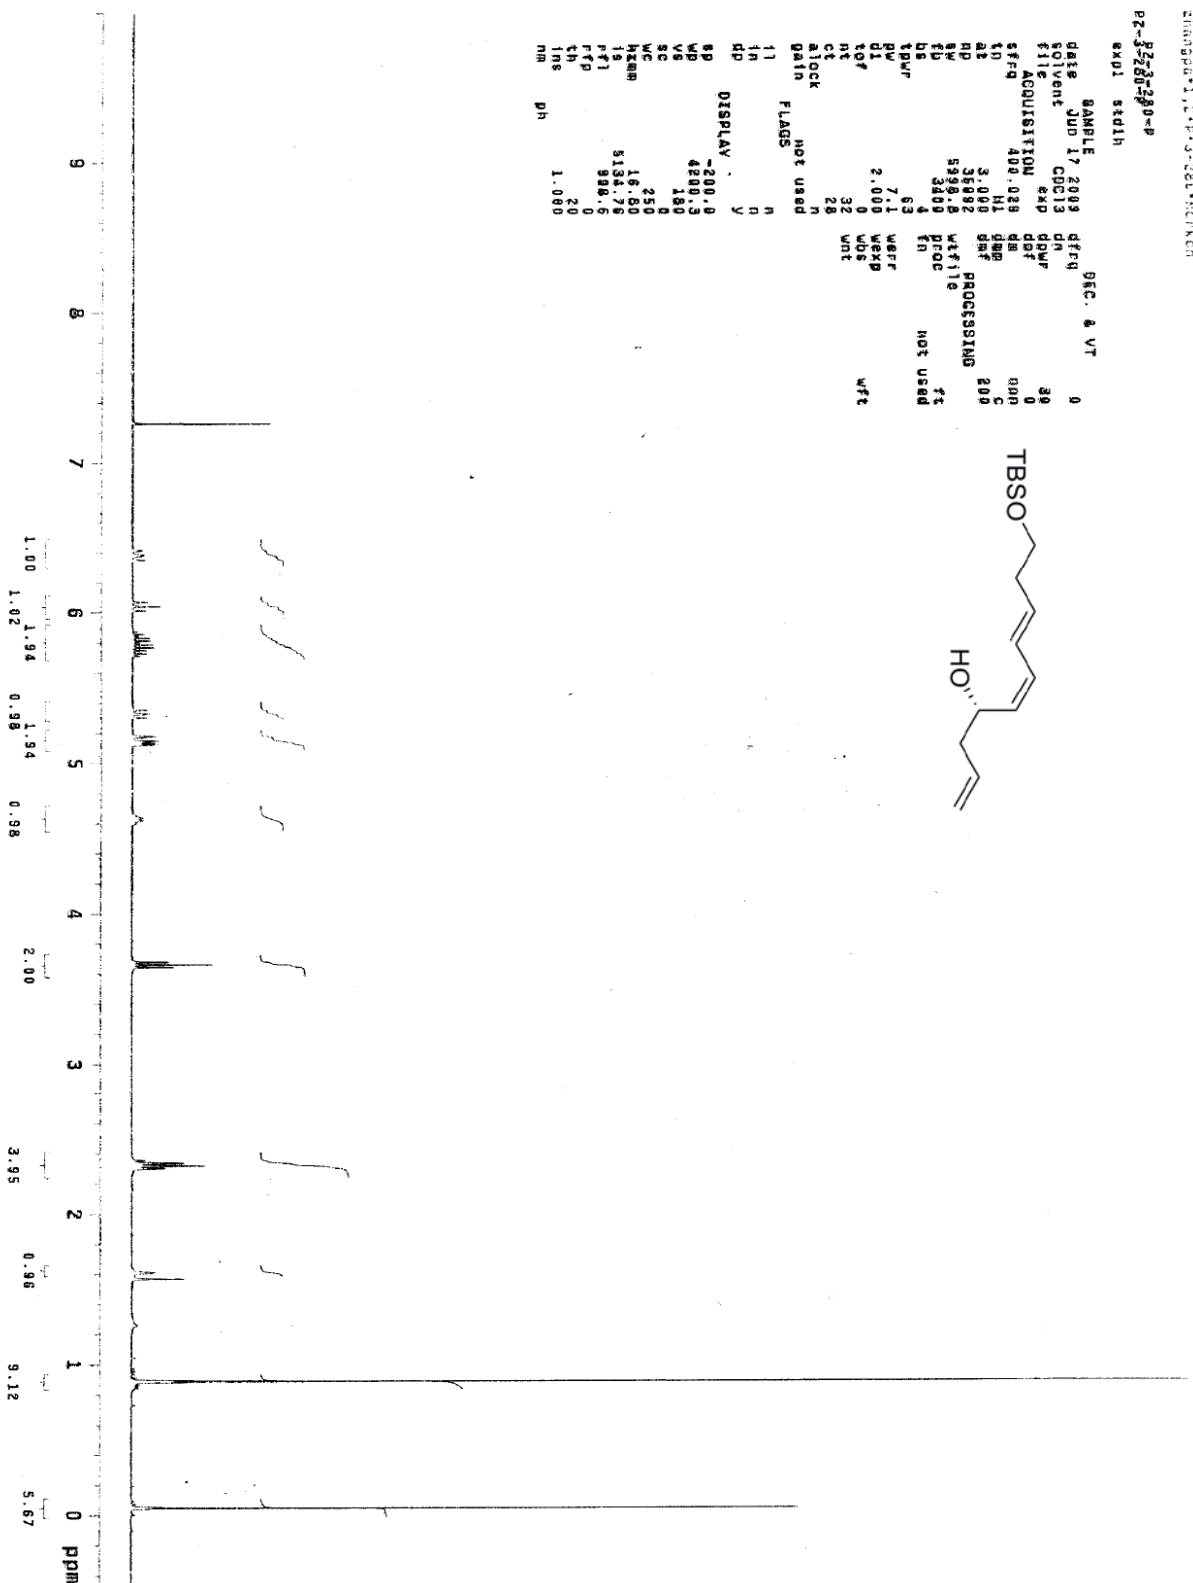

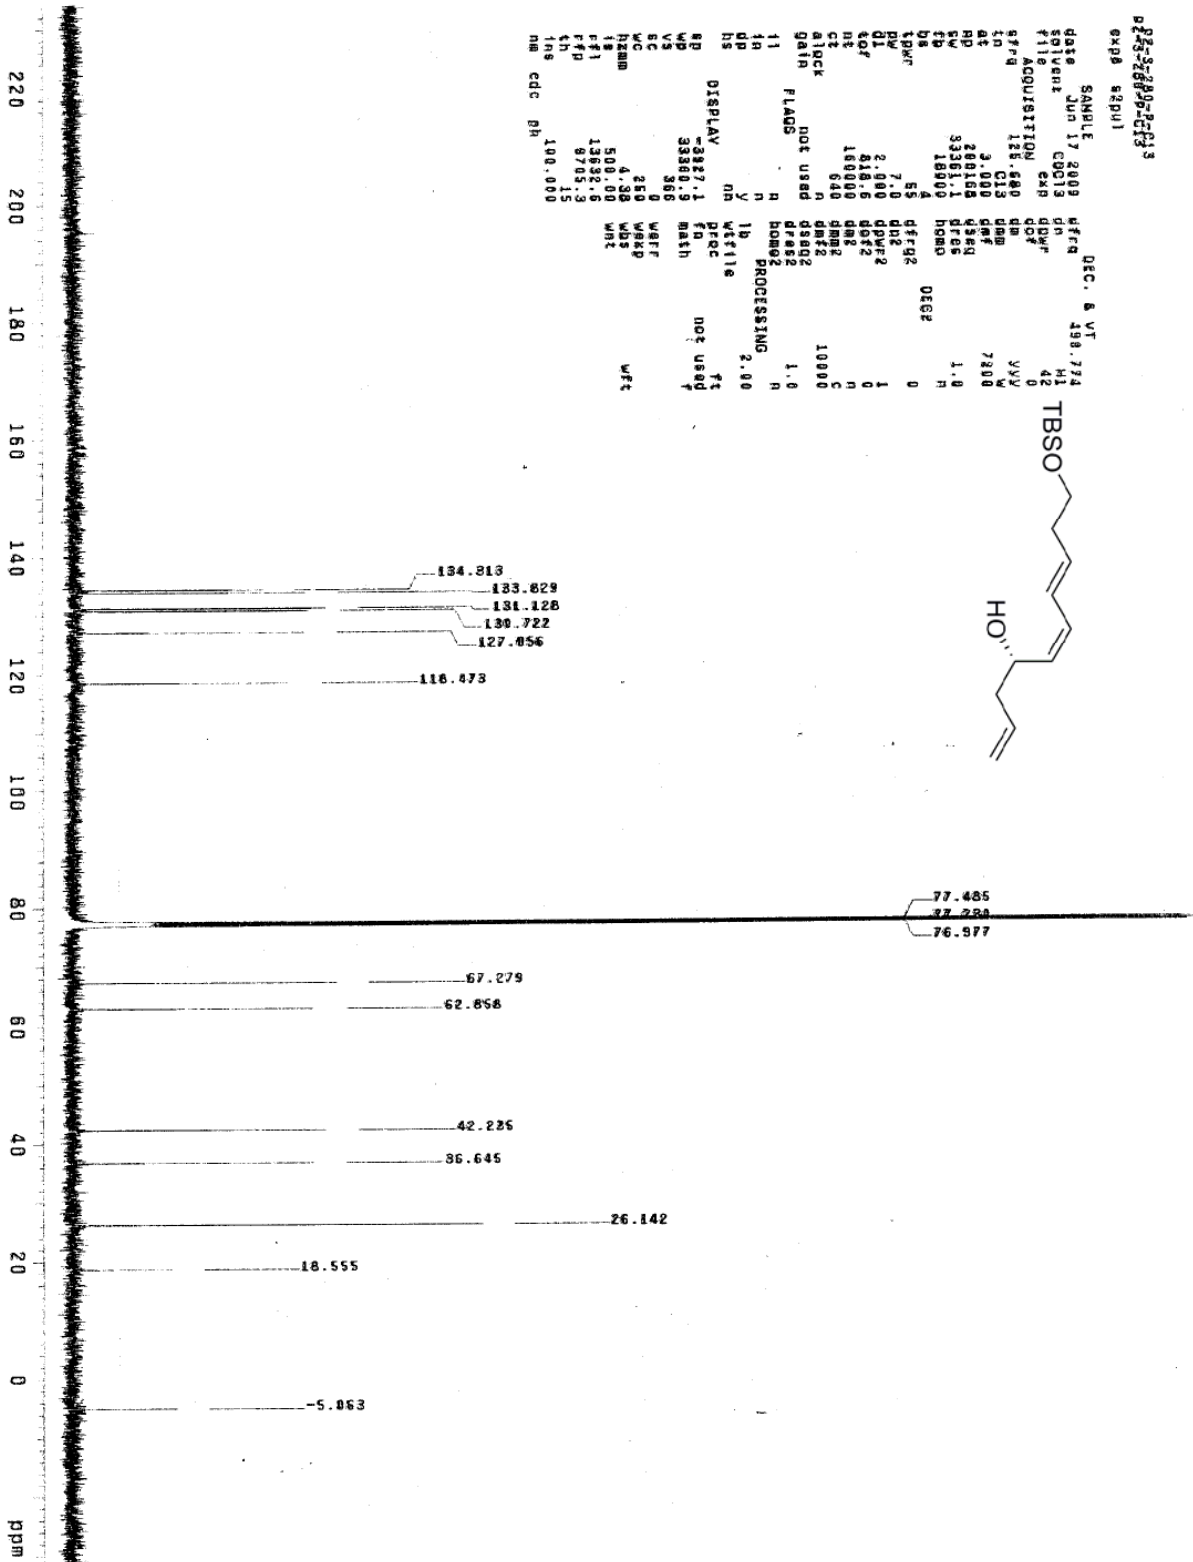

zhangpa1,2\*p\*3-191\*Morken

PZ-3-191-P  
 exp10 stdin

|             |            |           |            |
|-------------|------------|-----------|------------|
| date        | Apr 9 2009 | DEC. & VT | 0          |
| solvent     | CDCl3      | dn        | 30         |
| file        | exp        | dpwr      | 0          |
| ACQUISITION | exp        | dot       | nmn        |
| sfreq       | 400.029    | dm        | c          |
| tn          | H1         | dmn       | 200        |
| at          | 3.000      | dmf       | PROCESSING |
| np          | 33992      | wtfile    | 200        |
| sw          | 5938.8     | proc      | ft         |
| fb          | 3400       | fn        | not used   |
| bs          | 4          |           |            |
| epwr        | 63         | verf      |            |
| pw          | 7.1        | wexp      |            |
| dl          | 2.000      | wds       | wft        |
| cof         | 0          | wit       |            |
| ct          | 32         |           |            |
| cl          | 32         |           |            |
| alock       | not used   |           |            |
| gain        | not used   |           |            |
| flags       | not used   |           |            |
| ij          | n          |           |            |
| in          | n          |           |            |
| dp          | y          |           |            |

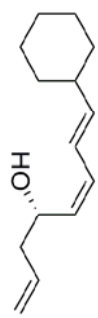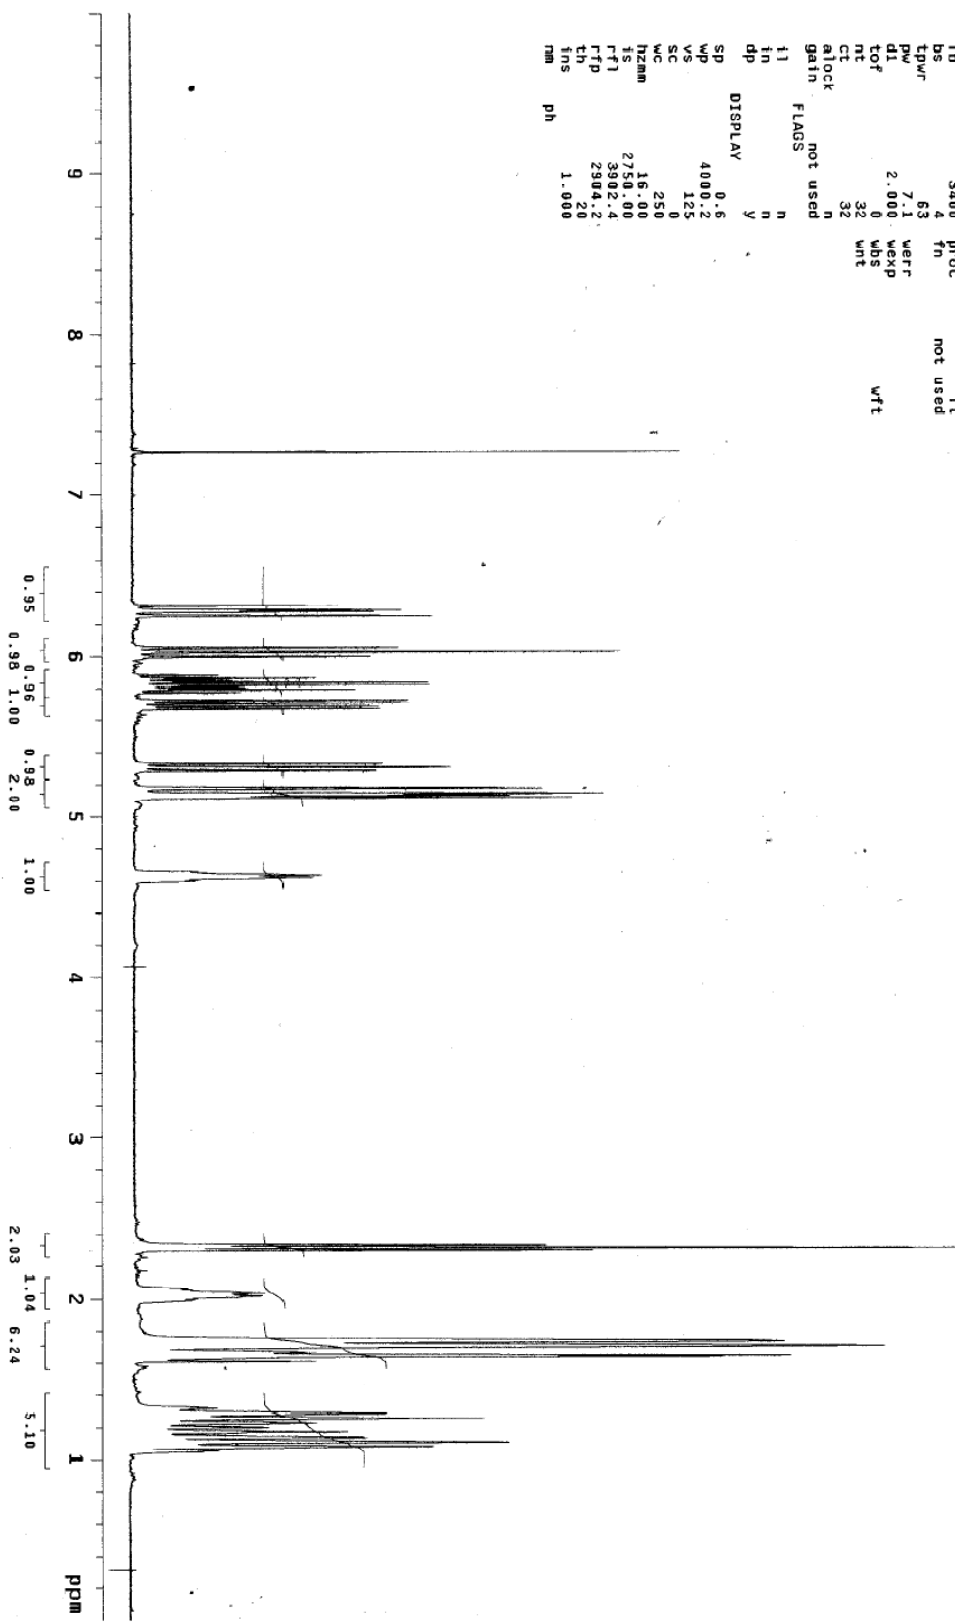

Pz-3-191-191-C13  
 expt10 std13c

SAMPLE DEC. & VT  
 date Apr 9 2009 dfrq 400.029  
 solvent CDCl3 dn H1  
 title /EXPORT/home/w dpvr 45  
 jpw/pz-3-191-P-~ dot 0  
 yyy w  
 ACQUISITION C13 dm  
 sfrq 100.539 dnt PROCESSING 3242  
 tn C13  
 at 0.640 wftfile ft  
 np 32876 proc not used  
 sw 258854.4 fn  
 fd 14200 wprt  
 TDW 55 wbsd  
 PW 9.0 wds  
 dt 4.000 wnt  
 tof 2271.7  
 nt 1600  
 ct 444  
 atlock n  
 gain not used  
 flags n  
 ii n  
 in n  
 dp DISPLAY Y

SP -1094.4  
 WP 25683.4  
 VS 84  
 SC 0  
 WC 250  
 nzm 1.36  
 IS 500.90  
 FTI 8822.7  
 TPI 7785.3  
 S0 100.83  
 S1 100.000  
 nm no ph

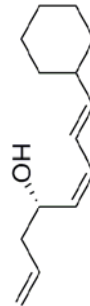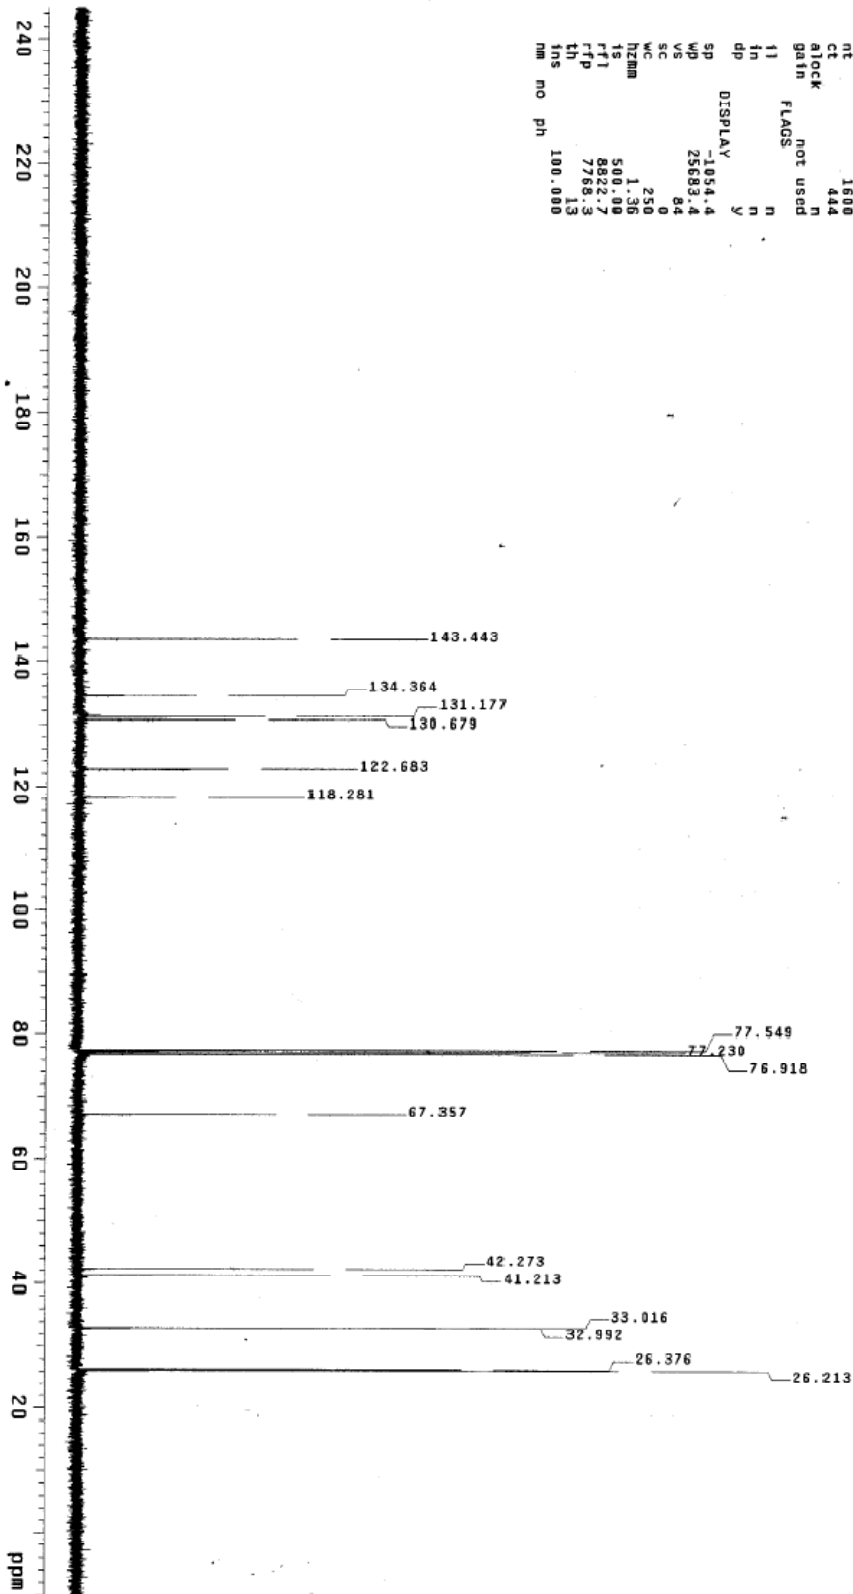



zhangpa\*1,2\*pp\*3-159\*Morken

p2-3-159-159-pp  
exp2 std1h

```

SAMPLE Mar 18 2009 DEC. 8 VT 0
solvent CDC13 dn 30
title exp dpvr 0
ACQUISITION dm 0 nm
sfrq 400.029 dm
tn H1 dm
at 3.000 dm
np 38592 wftfile 200
qw 5980.0 wftfile
hs 349 proc tn
tpwr 63 tn not used
pw 7.1 werr
dl 2.000 wexp
tof 0 wbs
nt 32 wnt
ct 32
atlock n
gain not used
flags n
i1 n
i2 n
i3 n
i4 n
i5 n
i6 n
i7 n
i8 n
i9 n
i10 n
i11 n
i12 n
i13 n
i14 n
i15 n
i16 n
i17 n
i18 n
i19 n
i20 n
i21 n
i22 n
i23 n
i24 n
i25 n
i26 n
i27 n
i28 n
i29 n
i30 n
i31 n
i32 n
i33 n
i34 n
i35 n
i36 n
i37 n
i38 n
i39 n
i40 n
i41 n
i42 n
i43 n
i44 n
i45 n
i46 n
i47 n
i48 n
i49 n
i50 n
i51 n
i52 n
i53 n
i54 n
i55 n
i56 n
i57 n
i58 n
i59 n
i60 n
i61 n
i62 n
i63 n
i64 n
i65 n
i66 n
i67 n
i68 n
i69 n
i70 n
i71 n
i72 n
i73 n
i74 n
i75 n
i76 n
i77 n
i78 n
i79 n
i80 n
i81 n
i82 n
i83 n
i84 n
i85 n
i86 n
i87 n
i88 n
i89 n
i90 n
i91 n
i92 n
i93 n
i94 n
i95 n
i96 n
i97 n
i98 n
i99 n
i100 n

```

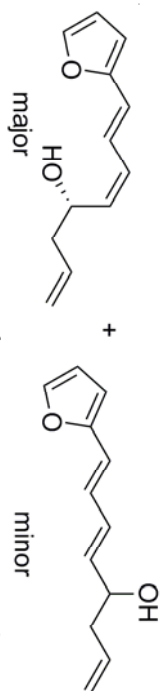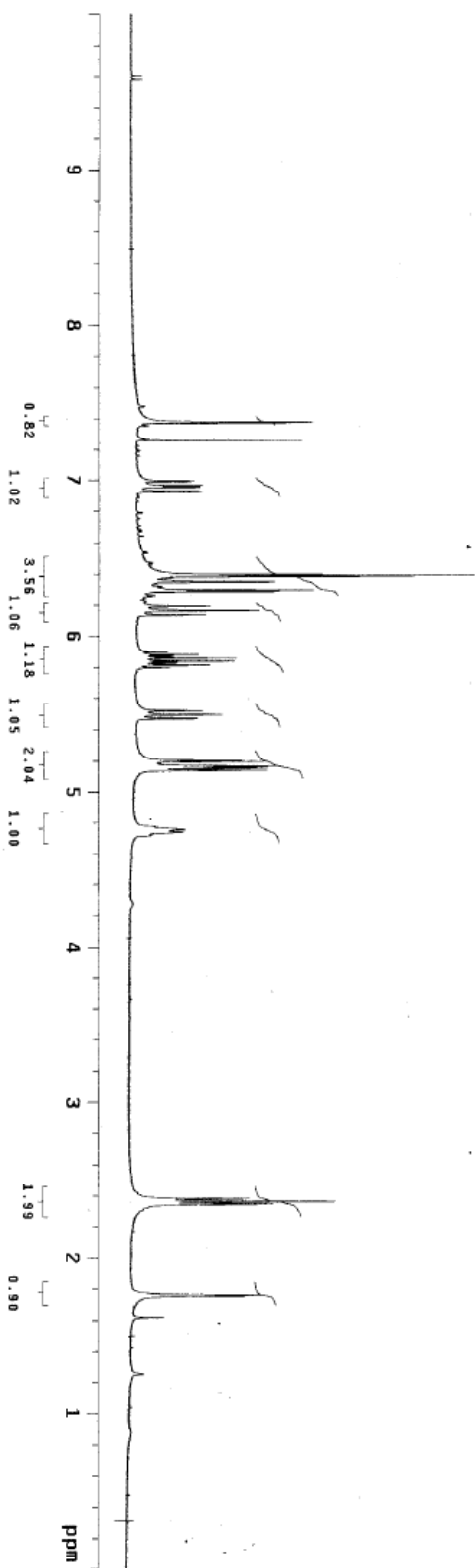

P2-3139-133-013130  
 exp1 std13c

SAMPLE DEC. & VT  
 date Mar 17 2013 dfrq 399.758  
 solvent CDCl3 dn n1  
 file /223-159/223-159.d01 dn 1  
 gcafb/223-130-11d dn 0  
 yyy v  
 ACQUISITION  
 sfrq 100.531 dmf 9259  
 tn C13 dseq  
 at 2.000 dres 1.0  
 np 100000 homo n  
 sw 25000.0 temp 25.0  
 fb 14000 PROCESSING  
 2.00  
 bs 4 lb  
 tpwr 59 wittle  
 pw 9.7 ft  
 dl 1.000 fn not used  
 tof 0 math f  
 nt 10000  
 ct 952 warr  
 atlock 5 wexp  
 gain not used  
 wnt  
 fl n  
 fh n  
 dp n  
 hs n  
 DISPLAY  
 sp -2988.5  
 wp 24999.6  
 vs 50  
 sc 0  
 wc 250  
 hzmm 5.87  
 ls 500.00  
 rfi 10752.1  
 rfp 7763.3  
 th 9  
 hrs 100.000  
 nm

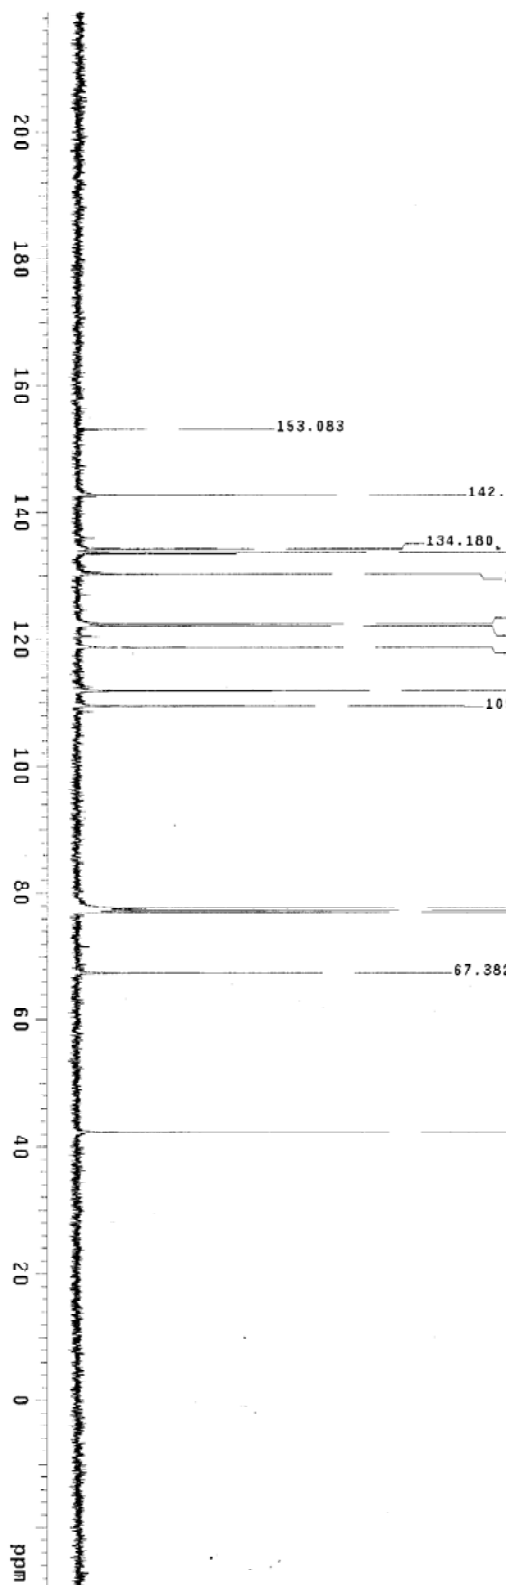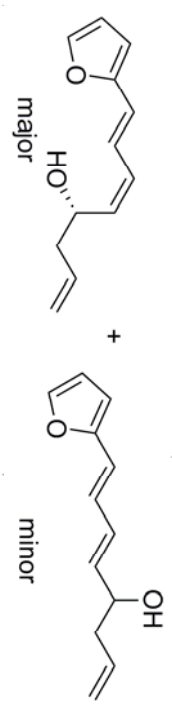

zhangpa\*1,2\*p\*3-192\*Mor\*ken

STANDARD DISPERSE P2-5-072-P

expt stdIn

|             |             |           |            |
|-------------|-------------|-----------|------------|
| date        | Apr 16 2009 | DEC. & VT | 0          |
| solvent     | CDCl3       | dn        | 30         |
| TI          | exp         | dpwr      | 0          |
| ACQUISITION | exp         | doF       | 0          |
| sfreq       | 400.029     | da        | mm         |
| tn          | 3.000       | HI dnm    | 5          |
| at          | 35992       | daf       | 200        |
| np          | 5998.8      | wifile    | PROCESSING |
| sw          | 3400        | proc      | ft         |
| fb          | 3400        | fn        | not used   |
| bs          | 4           |           |            |
| tpwr        | 63          | werr      | 7.1        |
| pw          | 2.000       | wexp      | 0          |
| dl          | 0           | whs       | 32         |
| tof         | 0           | wht       | 32         |
| nt          | 32          |           |            |
| ct          | 32          |           |            |
| atlock      | n           |           |            |
| gain        | not used    |           |            |
| FLAGS       | not used    |           |            |
| l1          | n           |           |            |
| l2          | n           |           |            |
| l3          | n           |           |            |
| dp          | y           |           |            |
| DISPLAY     | -0.1        |           |            |
| sp          | 4000.2      |           |            |
| wp          | 76          |           |            |
| vs          | 0           |           |            |
| sc          | 250         |           |            |
| vc          | 0           |           |            |
| hzm         | 16.00       |           |            |
| hzm         | 3014.70     |           |            |
| ts          | 3903.1      |           |            |
| FTF         | 2904.2      |           |            |
| tn          | 20          |           |            |
| ins         | 1.000       |           |            |
| nm          |             |           |            |
| ph          |             |           |            |

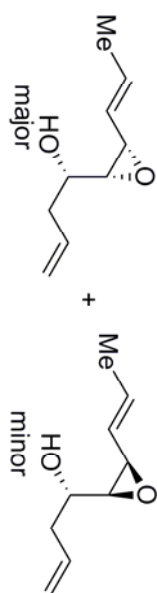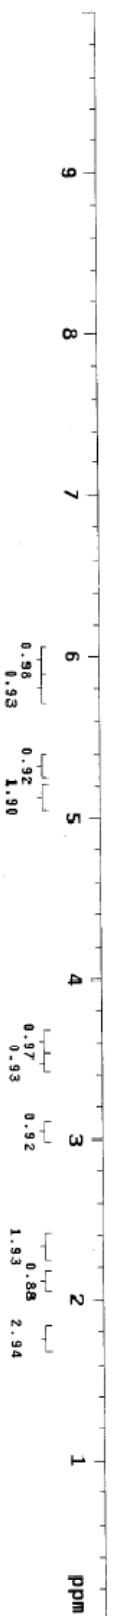

p2-3-192-192-P-C13  
 expt1 std13c

```

SAMPLE DEC. & VT
date Apr 16 2009 dfrq 400.029
solvent CDCl3 dn H1
F1 ACQUISITION exp dpr 45
sfreq 100.599 dm yyj 45
tn C13 dnm
at 0.640 daf 9242
np 32876 PROCESSED
sw 25683.4 wf1le ft
fb 14200 proc not used
bs 4 tn
tpwr 55
pw 9.10 werr
di 4.1000 wexp
tot 2271.7 wst
ct 44.17 wnt
cl 1036
alock not used
gain not used
fl flags n
in n
dp DISPLAY y
sp -1052.1
wp 25683.4
vs 189
sc 25.0
v 0
hzmm 102.73
is 500.00
rf1 8823.5
rfp 7771.3
th 12
ins 100.000
nm no ph
    
```

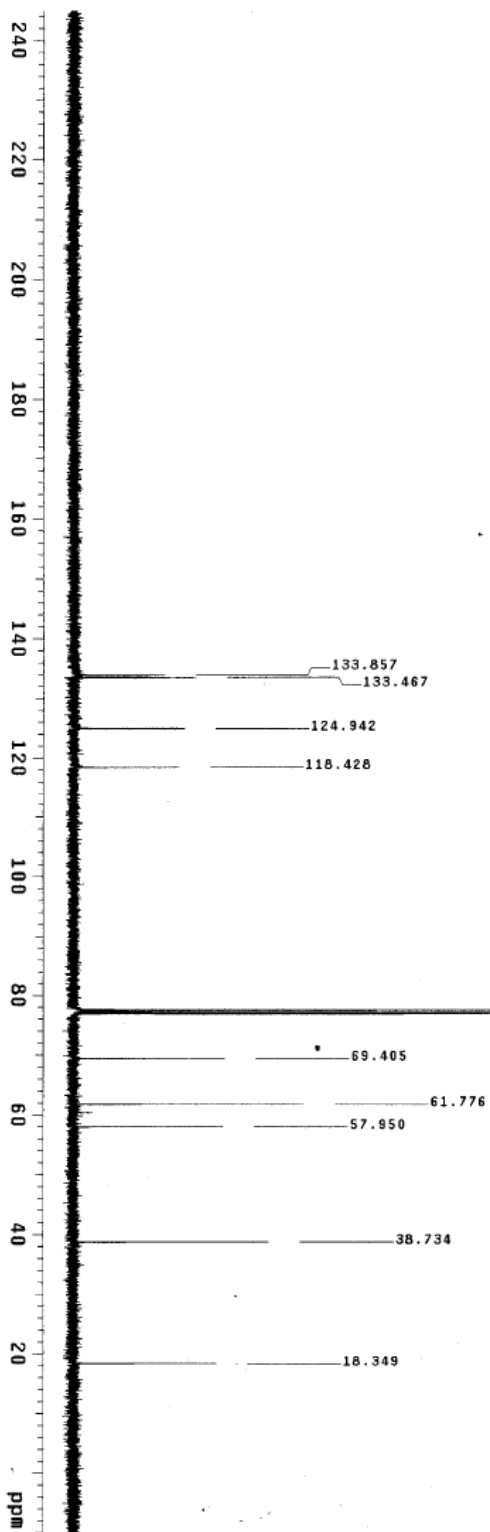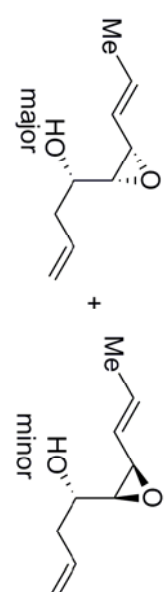

```

P2-3-2008-BPP
expt 12pu1

SAMPLE
date Apr 18 2009 dfreq DEC. 4 VT 499.774
solvent CDCl3 dn H1
file ACQUISITION exp dn H1
sfrq 499.774 dm dof 30
tn H1 dm nm 0
at 5.008 dmf c 200
nd 70058 dsen
sw 7005.9 dres 1.0
fb 4000 homo
bs 4
tdwr 57 dfrq2 DEC2
pv 4.6 dn2 0
sl 0 dpvr2 1
tof 497.0 dot2 0
nt 54 dm2 n
ct 54 dm2 c
atock n dmf2 200
gain not used dseq2
flans not used dres2
f1 n homo2 1.0
f2 n
f3 n PROCESSING
f4 n
f5 n
f6 n
f7 n
f8 n
f9 n
f10 n
f11 n
f12 n
f13 n
f14 n
f15 n
f16 n
f17 n
f18 n
f19 n
f20 n
f21 n
f22 n
f23 n
f24 n
f25 n
f26 n
f27 n
f28 n
f29 n
f30 n
f31 n
f32 n
f33 n
f34 n
f35 n
f36 n
f37 n
f38 n
f39 n
f40 n
f41 n
f42 n
f43 n
f44 n
f45 n
f46 n
f47 n
f48 n
f49 n
f50 n
f51 n
f52 n
f53 n
f54 n
f55 n
f56 n
f57 n
f58 n
f59 n
f60 n
f61 n
f62 n
f63 n
f64 n
f65 n
f66 n
f67 n
f68 n
f69 n
f70 n
f71 n
f72 n
f73 n
f74 n
f75 n
f76 n
f77 n
f78 n
f79 n
f80 n
f81 n
f82 n
f83 n
f84 n
f85 n
f86 n
f87 n
f88 n
f89 n
f90 n
f91 n
f92 n
f93 n
f94 n
f95 n
f96 n
f97 n
f98 n
f99 n
f100 n
f101 n
f102 n
f103 n
f104 n
f105 n
f106 n
f107 n
f108 n
f109 n
f110 n
f111 n
f112 n
f113 n
f114 n
f115 n
f116 n
f117 n
f118 n
f119 n
f120 n
f121 n
f122 n
f123 n
f124 n
f125 n
f126 n
f127 n
f128 n
f129 n
f130 n
f131 n
f132 n
f133 n
f134 n
f135 n
f136 n
f137 n
f138 n
f139 n
f140 n
f141 n
f142 n
f143 n
f144 n
f145 n
f146 n
f147 n
f148 n
f149 n
f150 n
f151 n
f152 n
f153 n
f154 n
f155 n
f156 n
f157 n
f158 n
f159 n
f160 n
f161 n
f162 n
f163 n
f164 n
f165 n
f166 n
f167 n
f168 n
f169 n
f170 n
f171 n
f172 n
f173 n
f174 n
f175 n
f176 n
f177 n
f178 n
f179 n
f180 n
f181 n
f182 n
f183 n
f184 n
f185 n
f186 n
f187 n
f188 n
f189 n
f190 n
f191 n
f192 n
f193 n
f194 n
f195 n
f196 n
f197 n
f198 n
f199 n
f200 n
f201 n
f202 n
f203 n
f204 n
f205 n
f206 n
f207 n
f208 n
f209 n
f210 n
f211 n
f212 n
f213 n
f214 n
f215 n
f216 n
f217 n
f218 n
f219 n
f220 n
f221 n
f222 n
f223 n
f224 n
f225 n
f226 n
f227 n
f228 n
f229 n
f230 n
f231 n
f232 n
f233 n
f234 n
f235 n
f236 n
f237 n
f238 n
f239 n
f240 n
f241 n
f242 n
f243 n
f244 n
f245 n
f246 n
f247 n
f248 n
f249 n
f250 n
f251 n
f252 n
f253 n
f254 n
f255 n
f256 n
f257 n
f258 n
f259 n
f260 n
f261 n
f262 n
f263 n
f264 n
f265 n
f266 n
f267 n
f268 n
f269 n
f270 n
f271 n
f272 n
f273 n
f274 n
f275 n
f276 n
f277 n
f278 n
f279 n
f280 n
f281 n
f282 n
f283 n
f284 n
f285 n
f286 n
f287 n
f288 n
f289 n
f290 n
f291 n
f292 n
f293 n
f294 n
f295 n
f296 n
f297 n
f298 n
f299 n
f300 n
f301 n
f302 n
f303 n
f304 n
f305 n
f306 n
f307 n
f308 n
f309 n
f310 n
f311 n
f312 n
f313 n
f314 n
f315 n
f316 n
f317 n
f318 n
f319 n
f320 n
f321 n
f322 n
f323 n
f324 n
f325 n
f326 n
f327 n
f328 n
f329 n
f330 n
f331 n
f332 n
f333 n
f334 n
f335 n
f336 n
f337 n
f338 n
f339 n
f340 n
f341 n
f342 n
f343 n
f344 n
f345 n
f346 n
f347 n
f348 n
f349 n
f350 n
f351 n
f352 n
f353 n
f354 n
f355 n
f356 n
f357 n
f358 n
f359 n
f360 n
f361 n
f362 n
f363 n
f364 n
f365 n
f366 n
f367 n
f368 n
f369 n
f370 n
f371 n
f372 n
f373 n
f374 n
f375 n
f376 n
f377 n
f378 n
f379 n
f380 n
f381 n
f382 n
f383 n
f384 n
f385 n
f386 n
f387 n
f388 n
f389 n
f390 n
f391 n
f392 n
f393 n
f394 n
f395 n
f396 n
f397 n
f398 n
f399 n
f400 n
f401 n
f402 n
f403 n
f404 n
f405 n
f406 n
f407 n
f408 n
f409 n
f410 n
f411 n
f412 n
f413 n
f414 n
f415 n
f416 n
f417 n
f418 n
f419 n
f420 n
f421 n
f422 n
f423 n
f424 n
f425 n
f426 n
f427 n
f428 n
f429 n
f430 n
f431 n
f432 n
f433 n
f434 n
f435 n
f436 n
f437 n
f438 n
f439 n
f440 n
f441 n
f442 n
f443 n
f444 n
f445 n
f446 n
f447 n
f448 n
f449 n
f450 n
f451 n
f452 n
f453 n
f454 n
f455 n
f456 n
f457 n
f458 n
f459 n
f460 n
f461 n
f462 n
f463 n
f464 n
f465 n
f466 n
f467 n
f468 n
f469 n
f470 n
f471 n
f472 n
f473 n
f474 n
f475 n
f476 n
f477 n
f478 n
f479 n
f480 n
f481 n
f482 n
f483 n
f484 n
f485 n
f486 n
f487 n
f488 n
f489 n
f490 n
f491 n
f492 n
f493 n
f494 n
f495 n
f496 n
f497 n
f498 n
f499 n
f500 n
f501 n
f502 n
f503 n
f504 n
f505 n
f506 n
f507 n
f508 n
f509 n
f510 n
f511 n
f512 n
f513 n
f514 n
f515 n
f516 n
f517 n
f518 n
f519 n
f520 n
f521 n
f522 n
f523 n
f524 n
f525 n
f526 n
f527 n
f528 n
f529 n
f530 n
f531 n
f532 n
f533 n
f534 n
f535 n
f536 n
f537 n
f538 n
f539 n
f540 n
f541 n
f542 n
f543 n
f544 n
f545 n
f546 n
f547 n
f548 n
f549 n
f550 n
f551 n
f552 n
f553 n
f554 n
f555 n
f556 n
f557 n
f558 n
f559 n
f560 n
f561 n
f562 n
f563 n
f564 n
f565 n
f566 n
f567 n
f568 n
f569 n
f570 n
f571 n
f572 n
f573 n
f574 n
f575 n
f576 n
f577 n
f578 n
f579 n
f580 n
f581 n
f582 n
f583 n
f584 n
f585 n
f586 n
f587 n
f588 n
f589 n
f590 n
f591 n
f592 n
f593 n
f594 n
f595 n
f596 n
f597 n
f598 n
f599 n
f600 n
f601 n
f602 n
f603 n
f604 n
f605 n
f606 n
f607 n
f608 n
f609 n
f610 n
f611 n
f612 n
f613 n
f614 n
f615 n
f616 n
f617 n
f618 n
f619 n
f620 n
f621 n
f622 n
f623 n
f624 n
f625 n
f626 n
f627 n
f628 n
f629 n
f630 n
f631 n
f632 n
f633 n
f634 n
f635 n
f636 n
f637 n
f638 n
f639 n
f640 n
f641 n
f642 n
f643 n
f644 n
f645 n
f646 n
f647 n
f648 n
f649 n
f650 n
f651 n
f652 n
f653 n
f654 n
f655 n
f656 n
f657 n
f658 n
f659 n
f660 n
f661 n
f662 n
f663 n
f664 n
f665 n
f666 n
f667 n
f668 n
f669 n
f670 n
f671 n
f672 n
f673 n
f674 n
f675 n
f676 n
f677 n
f678 n
f679 n
f680 n
f681 n
f682 n
f683 n
f684 n
f685 n
f686 n
f687 n
f688 n
f689 n
f690 n
f691 n
f692 n
f693 n
f694 n
f695 n
f696 n
f697 n
f698 n
f699 n
f700 n
f701 n
f702 n
f703 n
f704 n
f705 n
f706 n
f707 n
f708 n
f709 n
f710 n
f711 n
f712 n
f713 n
f714 n
f715 n
f716 n
f717 n
f718 n
f719 n
f720 n
f721 n
f722 n
f723 n
f724 n
f725 n
f726 n
f727 n
f728 n
f729 n
f730 n
f731 n
f732 n
f733 n
f734 n
f735 n
f736 n
f737 n
f738 n
f739 n
f740 n
f741 n
f742 n
f743 n
f744 n
f745 n
f746 n
f747 n
f748 n
f749 n
f750 n
f751 n
f752 n
f753 n
f754 n
f755 n
f756 n
f757 n
f758 n
f759 n
f760 n
f761 n
f762 n
f763 n
f764 n
f765 n
f766 n
f767 n
f768 n
f769 n
f770 n
f771 n
f772 n
f773 n
f774 n
f775 n
f776 n
f777 n
f778 n
f779 n
f780 n
f781 n
f782 n
f783 n
f784 n
f785 n
f786 n
f787 n
f788 n
f789 n
f790 n
f791 n
f792 n
f793 n
f794 n
f795 n
f796 n
f797 n
f798 n
f799 n
f800 n
f801 n
f802 n
f803 n
f804 n
f805 n
f806 n
f807 n
f808 n
f809 n
f810 n
f811 n
f812 n
f813 n
f814 n
f815 n
f816 n
f817 n
f818 n
f819 n
f820 n
f821 n
f822 n
f823 n
f824 n
f825 n
f826 n
f827 n
f828 n
f829 n
f830 n
f831 n
f832 n
f833 n
f834 n
f835 n
f836 n
f837 n
f838 n
f839 n
f840 n
f841 n
f842 n
f843 n
f844 n
f845 n
f846 n
f847 n
f848 n
f849 n
f850 n
f851 n
f852 n
f853 n
f854 n
f855 n
f856 n
f857 n
f858 n
f859 n
f860 n
f861 n
f862 n
f863 n
f864 n
f865 n
f866 n
f867 n
f868 n
f869 n
f870 n
f871 n
f872 n
f873 n
f874 n
f875 n
f876 n
f877 n
f878 n
f879 n
f880 n
f881 n
f882 n
f883 n
f884 n
f885 n
f886 n
f887 n
f888 n
f889 n
f890 n
f891 n
f892 n
f893 n
f894 n
f895 n
f896 n
f897 n
f898 n
f899 n
f900 n
f901 n
f902 n
f903 n
f904 n
f905 n
f906 n
f907 n
f908 n
f909 n
f910 n
f911 n
f912 n
f913 n
f914 n
f915 n
f916 n
f917 n
f918 n
f919 n
f920 n
f921 n
f922 n
f923 n
f924 n
f925 n
f926 n
f927 n
f928 n
f929 n
f930 n
f931 n
f932 n
f933 n
f934 n
f935 n
f936 n
f937 n
f938 n
f939 n
f940 n
f941 n
f942 n
f943 n
f944 n
f945 n
f946 n
f947 n
f948 n
f949 n
f950 n
f951 n
f952 n
f953 n
f954 n
f955 n
f956 n
f957 n
f958 n
f959 n
f960 n
f961 n
f962 n
f963 n
f964 n
f965 n
f966 n
f967 n
f968 n
f969 n
f970 n
f971 n
f972 n
f973 n
f974 n
f975 n
f976 n
f977 n
f978 n
f979 n
f980 n
f981 n
f982 n
f983 n
f984 n
f985 n
f986 n
f987 n
f988 n
f989 n
f990 n
f991 n
f992 n
f993 n
f994 n
f995 n
f996 n
f997 n
f998 n
f999 n
f1000 n

```

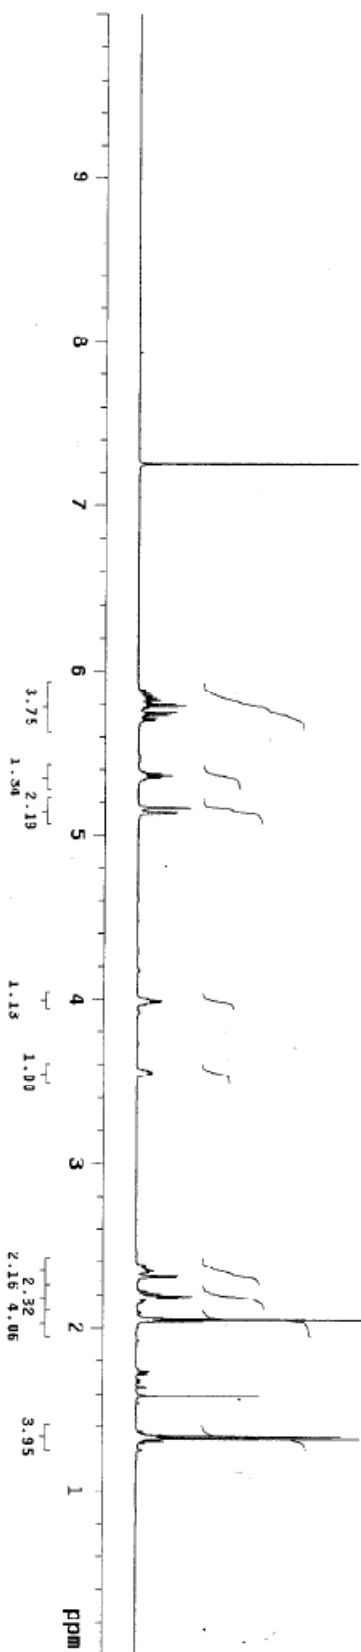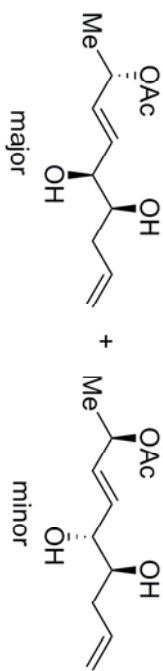

PZ-3-2008-PP-C13  
 expd szpul

SAMPLE DEC. & VT  
 date Apr 18 2009 dfrq 499.774  
 solvent CDCl3 d1 42  
 F1 ACQUISITION exp dpwr 0  
 strq 125.680 dm yyy w  
 tn C13 dmm 7200  
 at 3.000 dmf  
 np 200168 dseq 1.0  
 sw 33361.1 dres  
 fb 18000 homo  
 bs 55 dfrq2 DEC2 0  
 tpwr 7.0 dnc  
 pv 2.00 dpr2 1  
 dlf 8.00 dpr2  
 tof 5400 dms  
 nt 2348 dms2  
 alock not used  
 gain not used dres2 1.0  
 n homo2 n  
 in n wfile PROCESSING  
 dp y n proc not used  
 hs n math math  
 DISPLAY -3821.8 wft  
 sp wp 33360.9  
 vs sc 281 wgrd  
 v 250 wkd  
 hzmm 133.44  
 fs 500.00  
 rfi 3922.0  
 rfp 0  
 th 10  
 ns 100.000  
 nm cdc ph

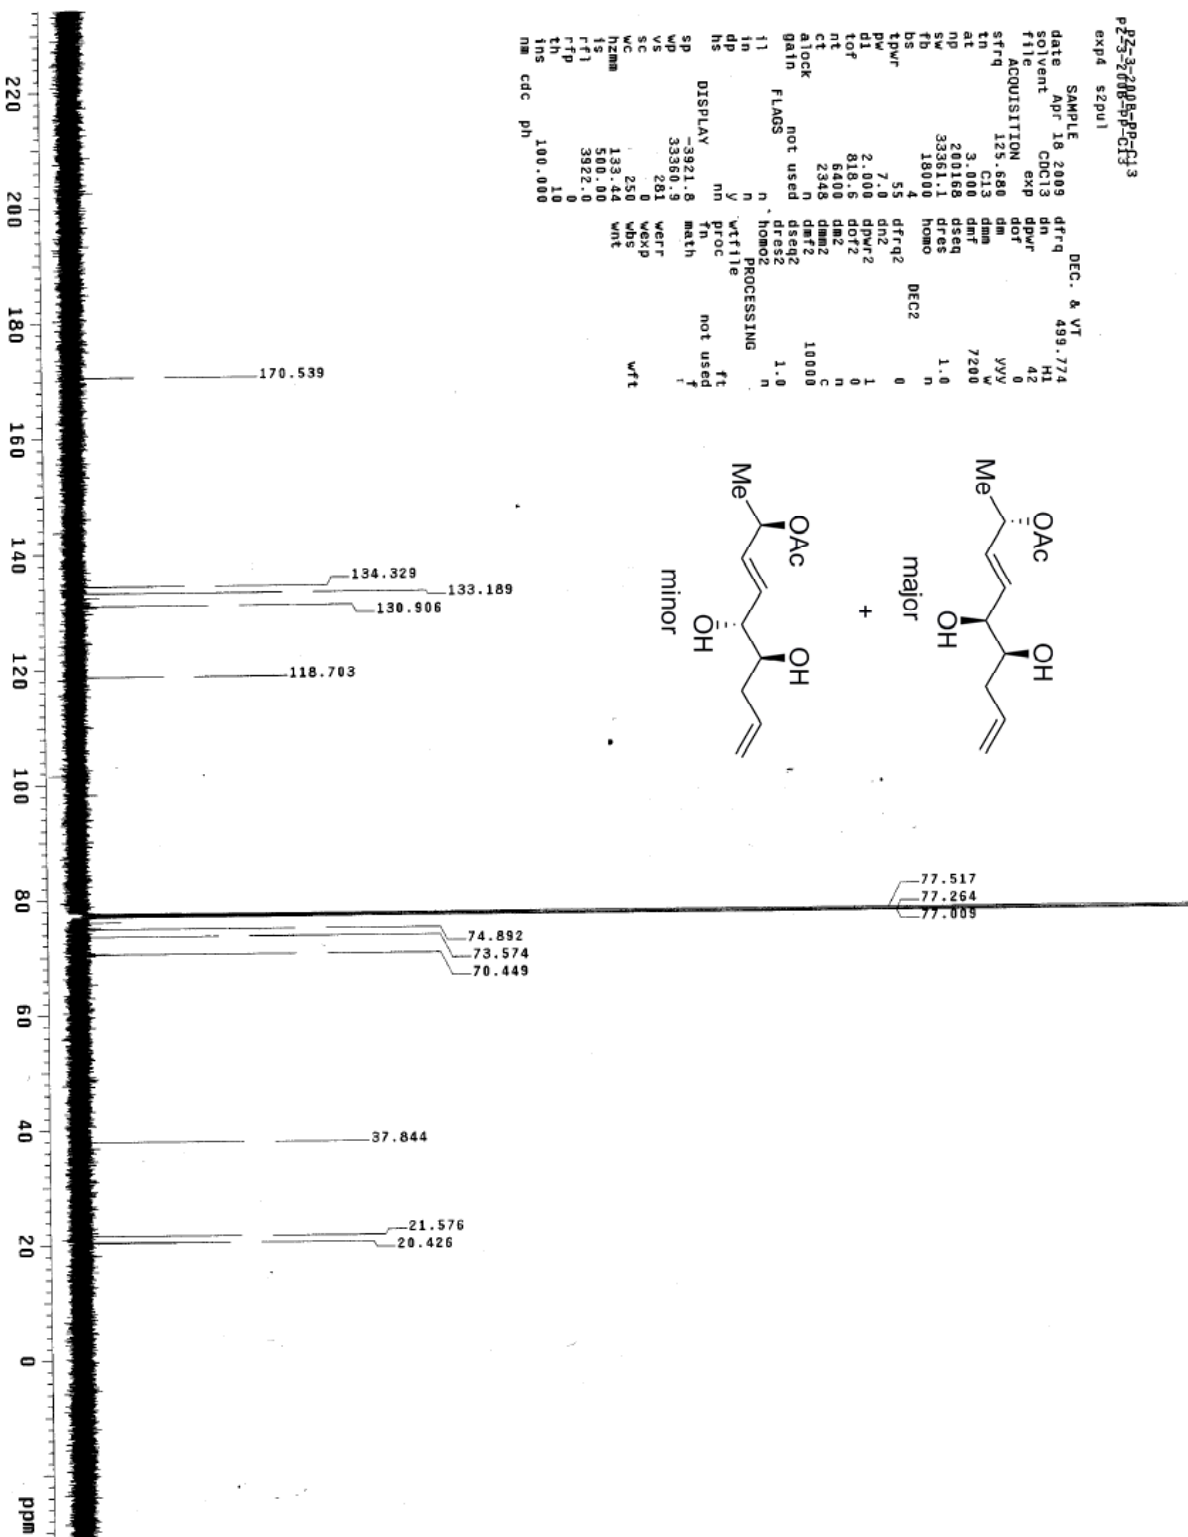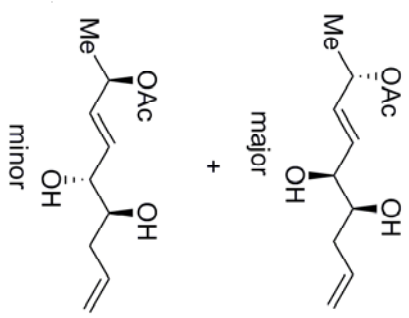

p273-3-21-14-PP  
 exp4 s2pu1

|         |             |            |           |          |
|---------|-------------|------------|-----------|----------|
| date    | Apr 18 2009 | df-rq      | DEC. & VT | 499.774  |
| solvent | CDCl3       | dn         | H1        | 30       |
| file    | ACQUISITION | exp        | dpwr      | 0        |
| sfreq   | 499.774     | dm         | dof       | 0        |
| tn      | H1          | dmm        | nnn       | 200      |
| at      | 5.000       | dmf        | c         | 200      |
| np      | 70058       | dseq       | res       | 1.0      |
| sw      | 7065.9      | dres       | homo      | n        |
| fb      | 4000        | homo       | DECZ      | 0        |
| bs      | 4           | dfreq2     | dn2       | 57       |
| tpwr    | 57          | dpwr2      | dot2      | 0        |
| pw      | 4.6         | dm2        | dmf2      | 64       |
| dl      | 0           | dm2        | dmf2      | 48       |
| tot     | 497.0       | dm2        | dmf2      | 48       |
| nt      | 64          | dm2        | dmf2      | 48       |
| ct      | 48          | dm2        | dmf2      | 48       |
| atlock  | n           | dseq2      | dres2     | 1.0      |
| gain    | not used    | homo2      | homo2     | n        |
| flags   | not used    | homo2      | homo2     | n        |
| fl      | n           | PROCESsing | ft        | not used |
| tn      | n           | wf file    | fn        | math     |
| dp      | an          | proc       | ft        | not used |
| hs      | an          | math       | wf        | wt       |
| sp      | DISPLAY     | math       | wf        | wt       |
| wp      | -0.1        | werr       | wf        | wt       |
| vs      | 4997.6      | wexp       | wf        | wt       |
| sc      | 106         | wbs        | wf        | wt       |
| wc      | 0           | wnt        | wf        | wt       |
| h2nm    | 19.99       |            |           |          |
| rs      | 737.06      |            |           |          |
| rtf1    | 4147.8      |            |           |          |
| rtf2    | 3628.3      |            |           |          |
| tn      | 7           |            |           |          |
| ins     | 1.000       |            |           |          |
| nm      |             |            |           |          |

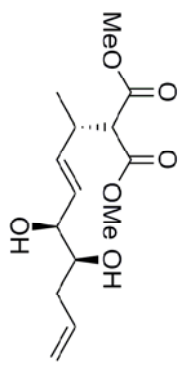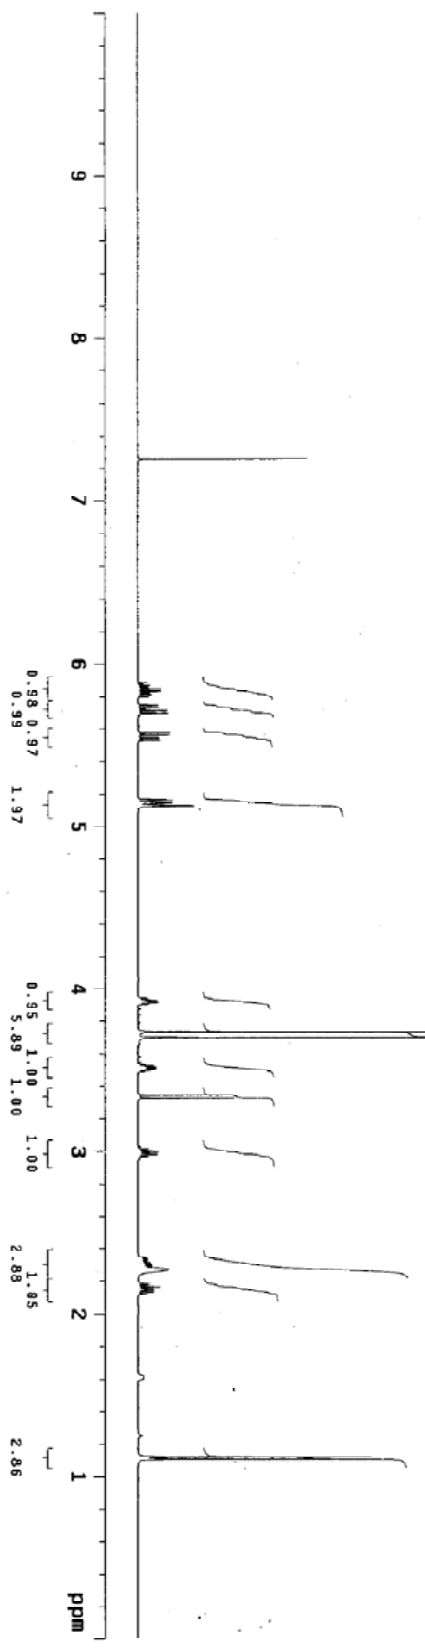

PZ-3-210-PP-C13  
 exp4 szpu1

SAMPLE DEC. & VT  
 date Apr 18 2009 dfrq 499.774  
 solvent CDCl3 dn H1  
 file CDC13 exp dpwr 42  
 ACQUISITION exp dof 0  
 sfrq 125.580 om vvy  
 tn 0.13 dmf W  
 ac 3.0 dmf 7200  
 su 200160 dresq  
 fb 33961.1 dres 1.0  
 bs 18000 homo 1.0  
 4  
 tpwr 55 dfrq2 DEC2  
 pw 7.0 dn2 0  
 di 2.000 dpwr2 1  
 tof 818.6 dof2 0  
 nt 16000 dm2 n  
 ct 2132 dmm2 c  
 alock n dmf2 10000  
 gain not used dres2  
 flags not used dres2 1.0  
 11 n homo2  
 in n wctfile PROCESSING  
 dn y n  
 ds n n  
 DISPLAY 3927.1 ft  
 sp mn proc not used f  
 wf 33960 math  
 wf 959 werr  
 wf 0 wexp  
 wf 250 wbs  
 wf 133.44 wnt  
 hzmm 500.00  
 ts 13632.6  
 rft1 9705.3  
 rft 14  
 th 14  
 ins 100.000  
 nm cdc ph

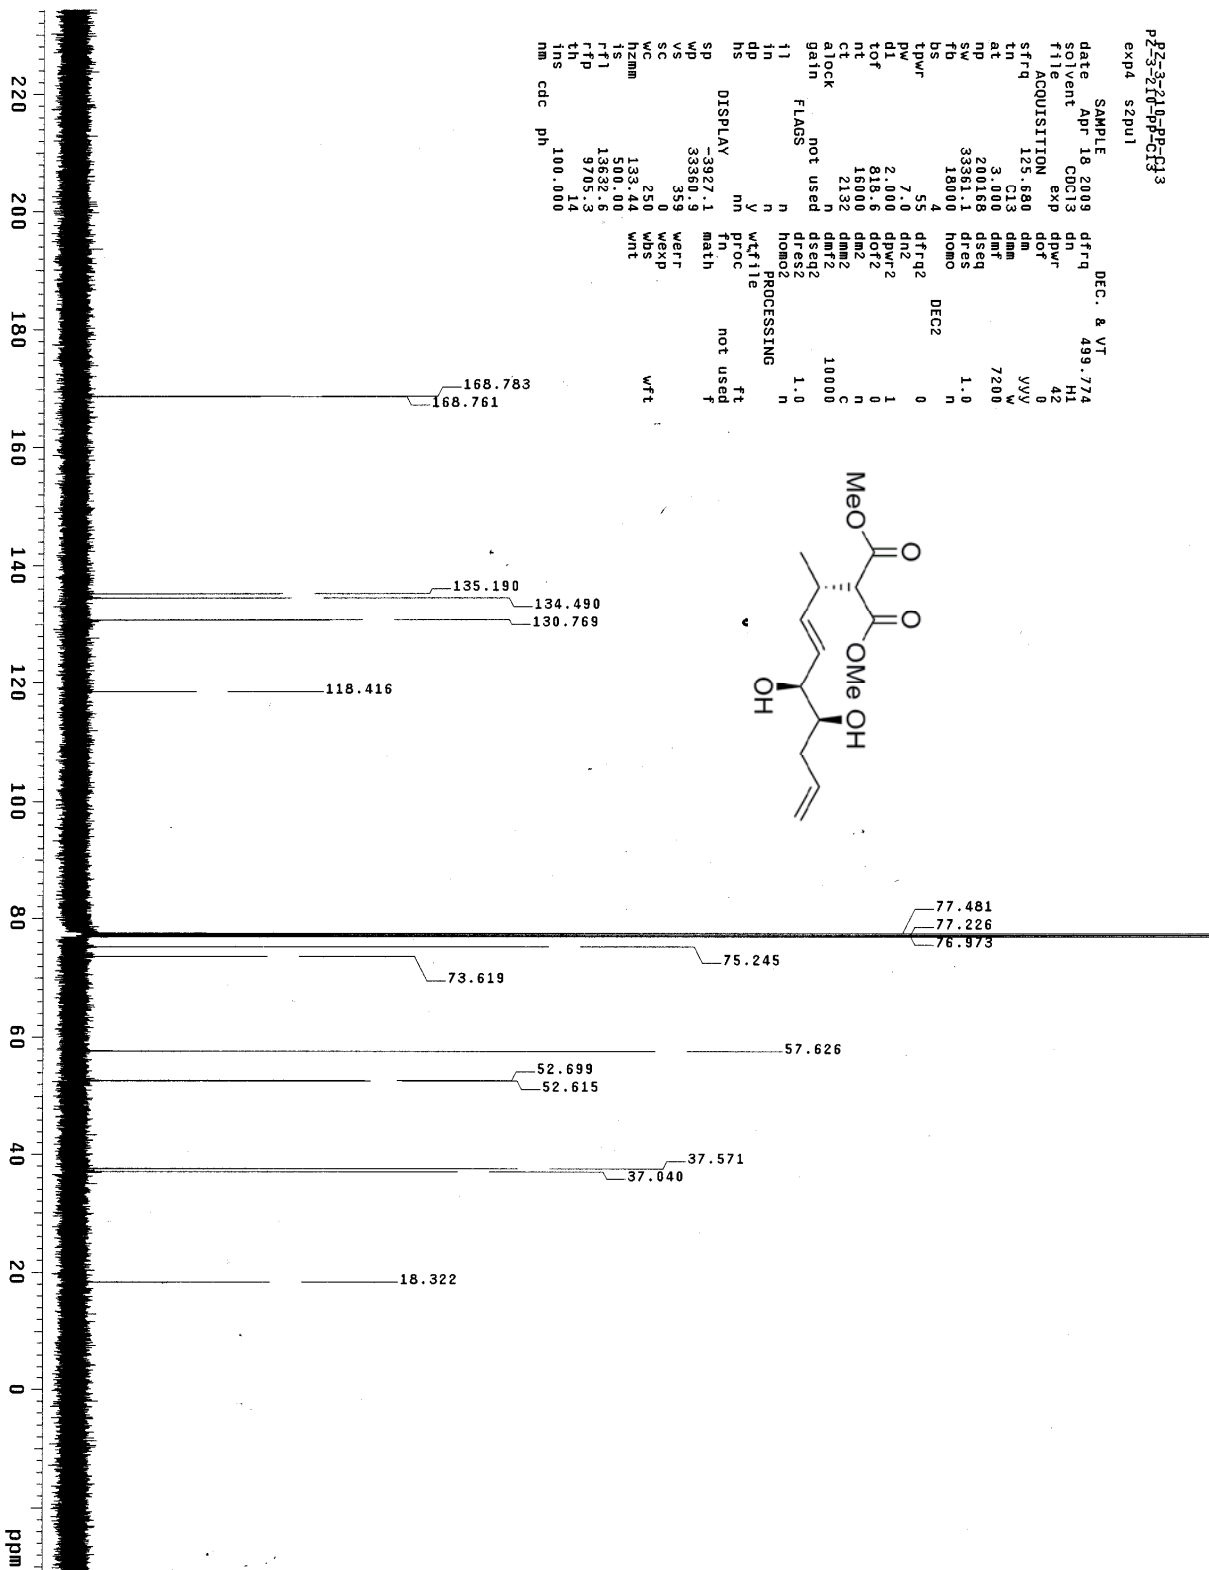



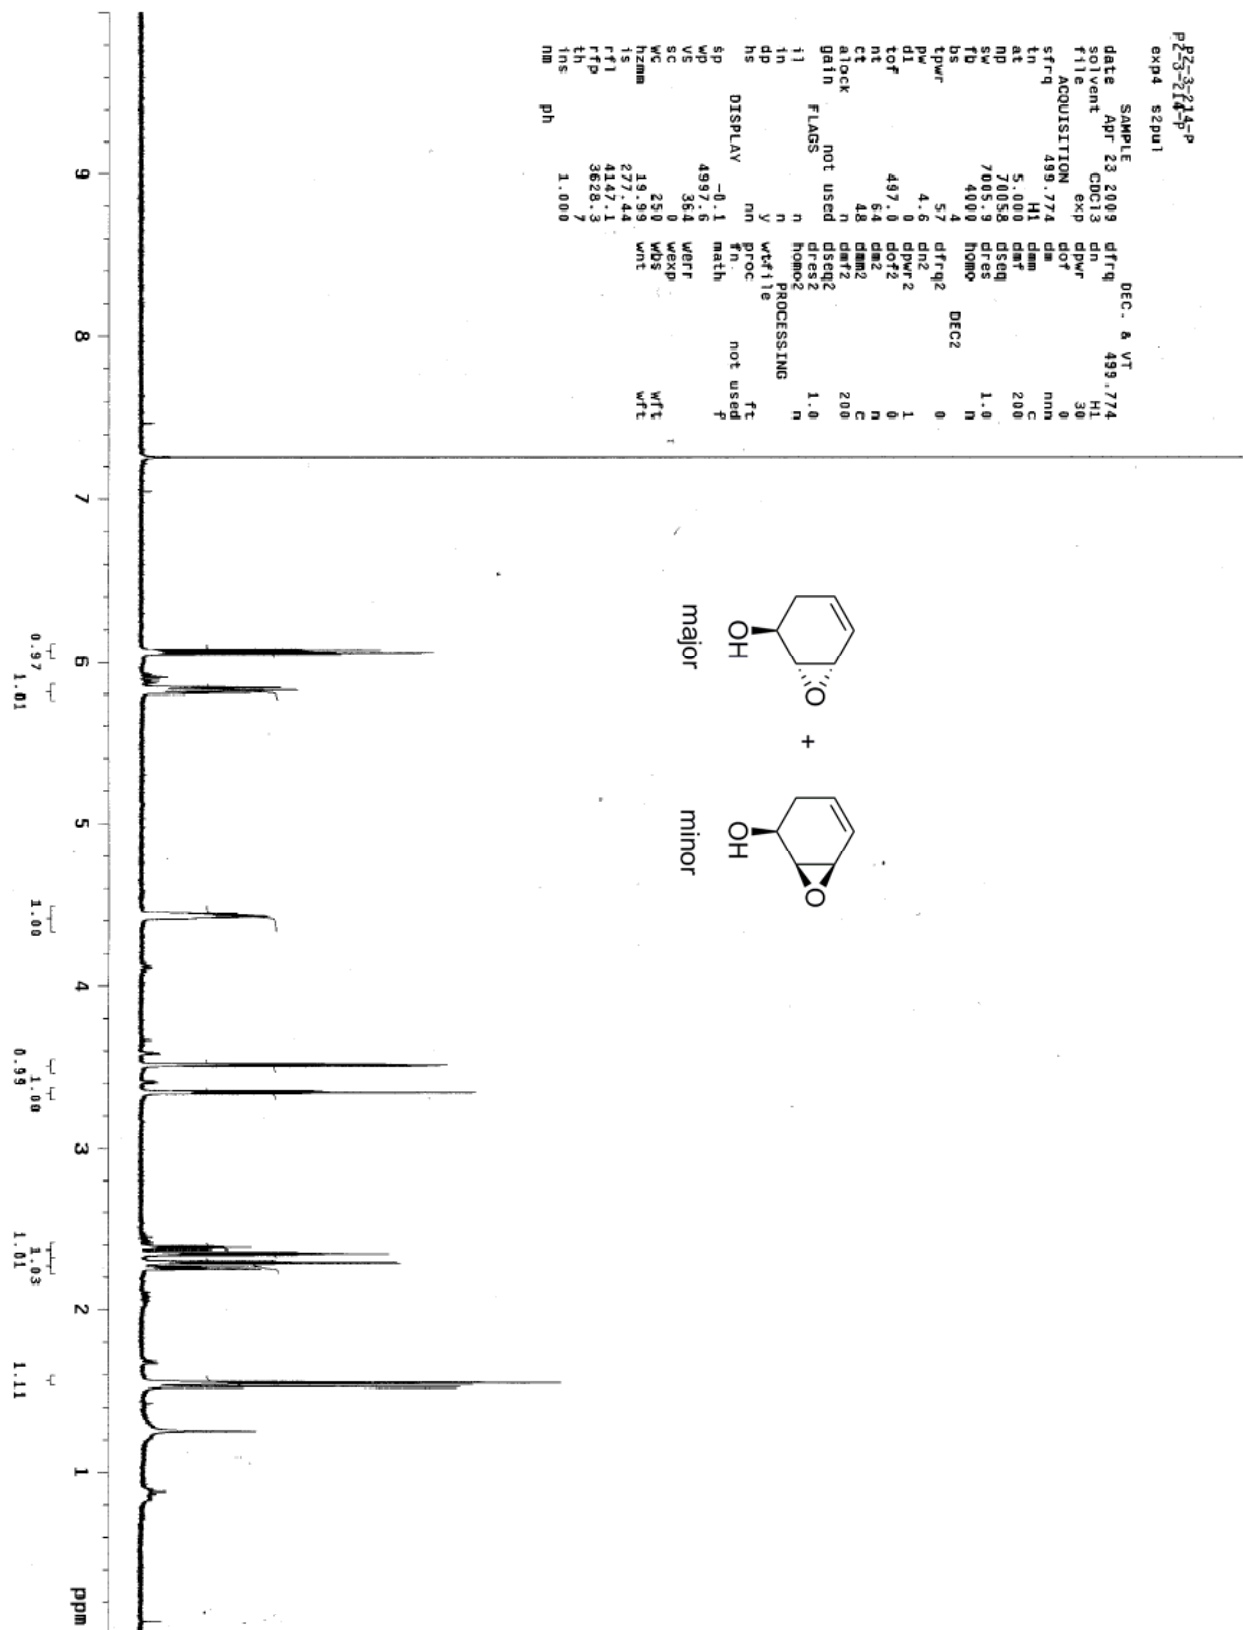

P23-3714-PC13  
 exp4 s2pui

SAMPLE DEC. & VI  
 date Apr 23 2009 dtrq 459.774  
 solvent CDCl3 dn H1  
 file exp dpwr 42  
 ACQUISITION dot 0  
 srrq 125.680 dm yyy  
 tn C13 dm W  
 at 3.000 dnt 7200  
 np 200105 dscq 1.0  
 sw 33581.1 ftes  
 hd 18004 homo  
 powr 55 dtrq2 DEC2 0  
 dv 7.0 dn2  
 dl 2.000 dpwr2 1  
 tof 816.6 dot2 0  
 nt 16000 cam2 n  
 ct 1544 cam2 C  
 atlock n cam2 10000  
 gain not used dscq2 1.0  
 11 n homo2 1.0  
 1n n  
 1p y  
 1b PROCESsing 2.00  
 hs n  
 DISPLAY nn wfile ft  
 sp 3925.5 T proc not used f  
 vp 33581.9 math  
 sc 445 0  
 wc 0 wrr  
 hzmm 133.44 wxp  
 ts 500.00 wds  
 rfp 13631.1 wtt  
 th 9705.3  
 17  
 100.060  
 nm cdc ph

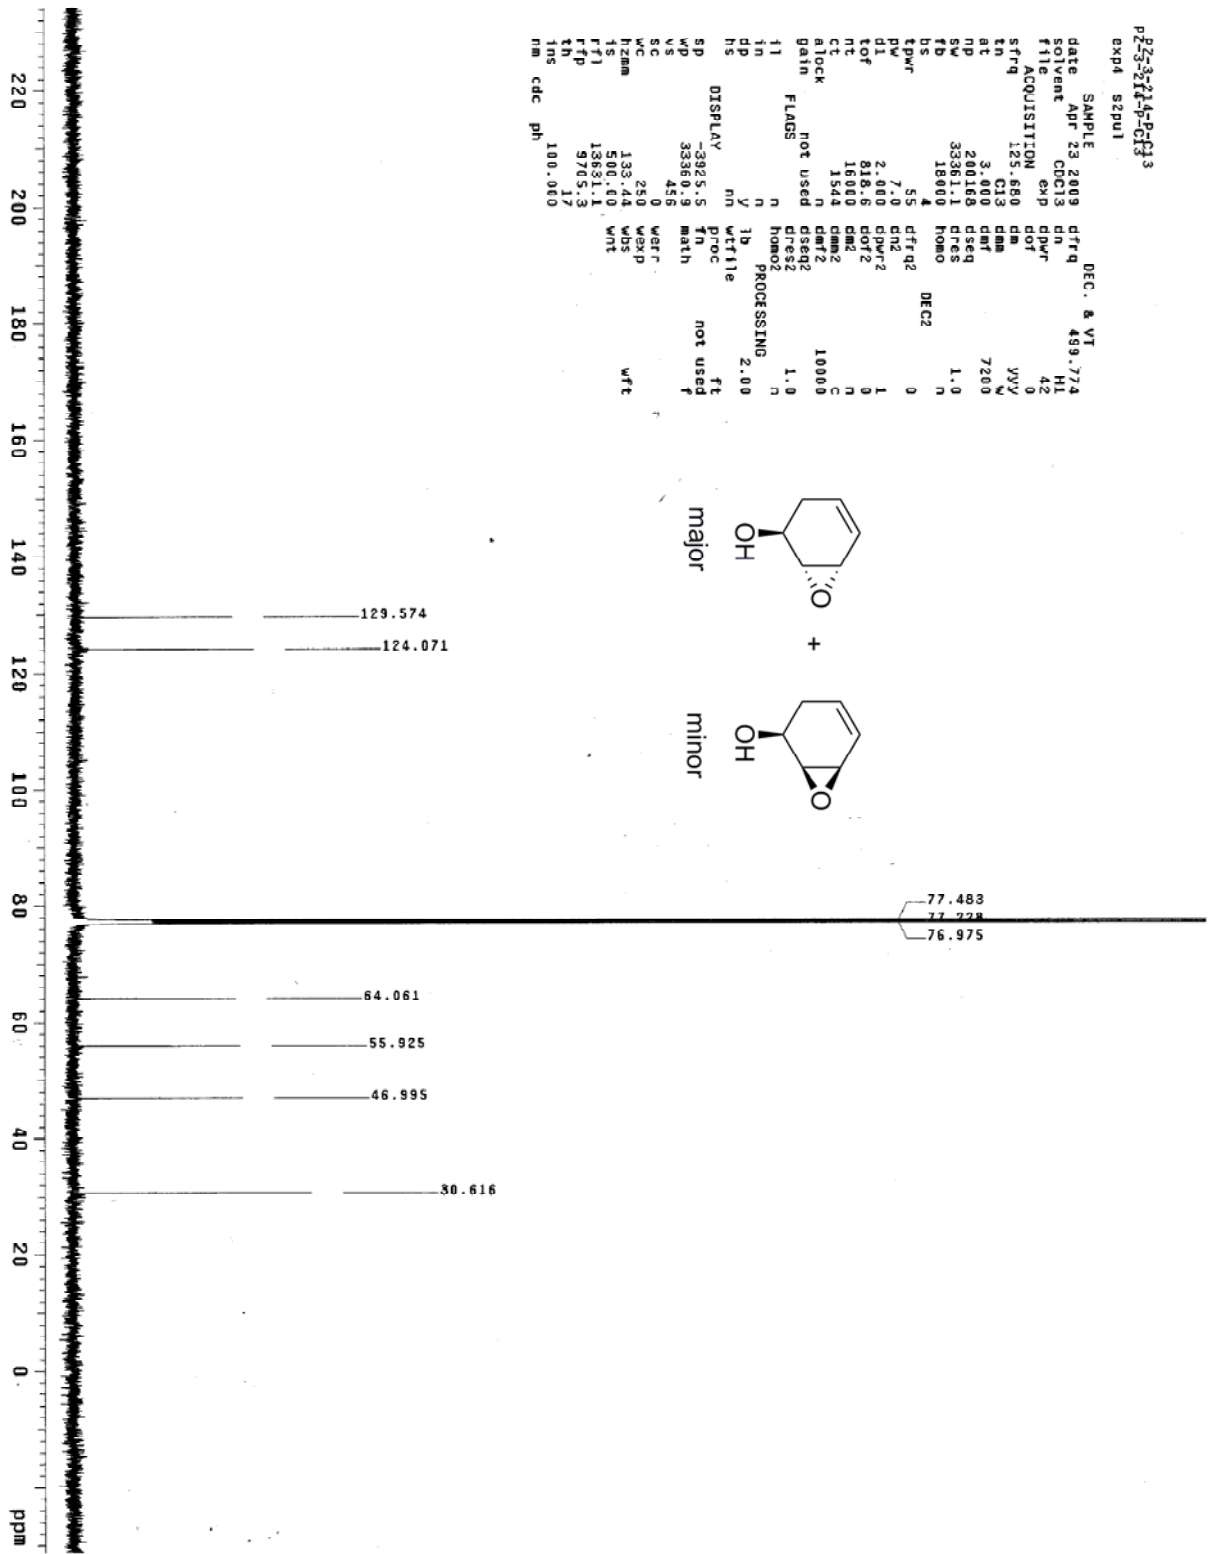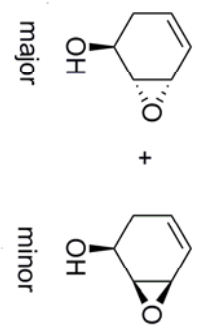

Supplement: NIHMS138813-supplement-1_si_001.pdf [file NIHMS138813-supplement-1_si_001.pdf]
